# Supplementary material for: Environmental Interactions and Epistasis Are Revealed in the Proteomic Responses to Complex Stimuli
Source: PLoS One. 2015 Aug 6;10(8):e0134099. doi: 10.1371/journal.pone.0134099 (PMC4527715; doi:10.1371/journal.pone.0134099)
Supplement: S10 Table — (XLSX) [file pone.0134099.s014.xlsx]

## Sheet: EpistasisProteinsGeneMANIA-Repo
GeneMANIA Results
Plugin Version	3.3.4 (20140731-1725)
Data Version	2014-08-12
Report Generated	Tue May 12 17:10:03 CDT 2015
Gene	Score	Description
RPL18A (YOL120C)		Protein component of the large (60S) ribosomal subunit, identical to Rpl18Bp and has similarity to rat L18 ribosomal protein; intron of RPL18A pre-mRNA forms stem-loop structures that are a target for Rnt1p cleavage leading to degradation [Source:SGD;Acc:S000005480]
RPS16A (YMR143W)		Protein component of the small (40S) ribosomal subunit; identical to Rps16Bp and has similarity to E. coli S9 and rat S16 ribosomal proteins [Source:SGD;Acc:S000004751]
RPL20A (YMR242C)		Protein component of the large (60S) ribosomal subunit, nearly identical to Rpl20Bp and has similarity to rat L18a ribosomal protein [Source:SGD;Acc:S000004855]
IMD1 (YAR073W)		Nonfunctional protein with homology to IMP dehydrogenase; probable pseudogene, located close to the telomere; is not expressed at detectable levels; YAR073W and YAR075W comprise a continuous reading frame in some strains of S. cerevisiae [Source:SGD;Acc:S000000095]
RPS18A (YDR450W)		Protein component of the small (40S) ribosomal subunit; nearly identical to Rps18Bp and has similarity to E. coli S13 and rat S18 ribosomal proteins [Source:SGD;Acc:S000002858]
RPL12B (YDR418W)		Protein component of the large (60S) ribosomal subunit, nearly identical to Rpl12Ap; rpl12a rpl12b double mutant exhibits slow growth and slow translation; has similarity to E. coli L11 and rat L12 ribosomal proteins [Source:SGD;Acc:S000002826]
RPS24B (YIL069C)		Protein component of the small (40S) ribosomal subunit; identical to Rps24Ap and has similarity to rat S24 ribosomal protein [Source:SGD;Acc:S000001331]
RPL19A (YBR084C-A)		Protein component of the large (60S) ribosomal subunit, nearly identical to Rpl19Bp and has similarity to rat L19 ribosomal protein; rpl19a and rpl19b single null mutations result in slow growth, while the double null mutation is lethal [Source:SGD;Acc:S000002156]
RPL20B (YOR312C)		Protein component of the large (60S) ribosomal subunit, nearly identical to Rpl20Ap and has similarity to rat L18a ribosomal protein [Source:SGD;Acc:S000005839]
RPS18B (YML026C)		Protein component of the small (40S) ribosomal subunit; nearly identical to Rps18Ap and has similarity to E. coli S13 and rat S18 ribosomal proteins [Source:SGD;Acc:S000004488]
RPS16B (YDL083C)		Protein component of the small (40S) ribosomal subunit; identical to Rps16Ap and has similarity to E. coli S9 and rat S16 ribosomal proteins [Source:SGD;Acc:S000002241]
RPS23B (YPR132W)		Ribosomal protein 28 (rp28) of the small (40S) ribosomal subunit, required for translational accuracy; nearly identical to Rps23Ap and similar to E. coli S12 and rat S23 ribosomal proteins; deletion of both RPS23A and RPS23B is lethal [Source:SGD;Acc:S000006336]
RPS4A (YJR145C)		Protein component of the small (40S) ribosomal subunit; mutation affects 20S pre-rRNA processing; identical to Rps4Bp and has similarity to rat S4 ribosomal protein [Source:SGD;Acc:S000003906]
RPS11A (YDR025W)		Protein component of the small (40S) ribosomal subunit; identical to Rps11Bp and has similarity to E. coli S17 and rat S11 ribosomal proteins [Source:SGD;Acc:S000002432]
RPL35A (YDL191W)		Protein component of the large (60S) ribosomal subunit, identical to Rpl35Bp and has similarity to rat L35 ribosomal protein [Source:SGD;Acc:S000002350]
RPS24A (YER074W)		Protein component of the small (40S) ribosomal subunit; identical to Rps24Bp and has similarity to rat S24 ribosomal protein [Source:SGD;Acc:S000000876]
RPL18B (YNL301C)		Protein component of the large (60S) ribosomal subunit, identical to Rpl18Ap and has similarity to rat L18 ribosomal protein [Source:SGD;Acc:S000005245]
RPS6B (YBR181C)		Protein component of the small (40S) ribosomal subunit; identical to Rps6Ap and has similarity to rat S6 ribosomal protein [Source:SGD;Acc:S000000385]
RPS11B (YBR048W)		Protein component of the small (40S) ribosomal subunit; identical to Rps11Ap and has similarity to E. coli S17 and rat S11 ribosomal proteins [Source:SGD;Acc:S000000252]
RPS4B (YHR203C)		Protein component of the small (40S) ribosomal subunit; identical to Rps4Ap and has similarity to rat S4 ribosomal protein [Source:SGD;Acc:S000001246]
RPL12A (YEL054C)		Protein component of the large (60S) ribosomal subunit, nearly identical to Rpl12Bp; rpl12a rpl12b double mutant exhibits slow growth and slow translation; has similarity to E. coli L11 and rat L12 ribosomal proteins [Source:SGD;Acc:S000000780]
RPL35B (YDL136W)		Protein component of the large (60S) ribosomal subunit, identical to Rpl35Ap and has similarity to rat L35 ribosomal protein [Source:SGD;Acc:S000002295]
RPL23A (YBL087C)		Protein component of the large (60S) ribosomal subunit, identical to Rpl23Bp and has similarity to E. coli L14 and rat L23 ribosomal proteins [Source:SGD;Acc:S000000183]
RPL19B (YBL027W)		Protein component of the large (60S) ribosomal subunit, nearly identical to Rpl19Ap and has similarity to rat L19 ribosomal protein; rpl19a and rpl19b single null mutations result in slow growth, while the double null mutation is lethal [Source:SGD;Acc:S000000123]
RPL23B (YER117W)		Protein component of the large (60S) ribosomal subunit, identical to Rpl23Ap and has similarity to E. coli L14 and rat L23 ribosomal proteins [Source:SGD;Acc:S000000919]
RPS6A (YPL090C)		Protein component of the small (40S) ribosomal subunit; identical to Rps6Bp and has similarity to rat S6 ribosomal protein [Source:SGD;Acc:S000006011]
RPS23A (YGR118W)		Ribosomal protein 28 (rp28) of the small (40S) ribosomal subunit, required for translational accuracy; nearly identical to Rps23Bp and similar to E. coli S12 and rat S23 ribosomal proteins; deletion of both RPS23A and RPS23B is lethal [Source:SGD;Acc:S000003350]
RPL1B (YGL135W)		N-terminally acetylated protein component of the large (60S) ribosomal subunit, nearly identical to Rpl1Ap and has similarity to E. coli L1 and rat L10a ribosomal proteins; rpl1a rpl1b double null mutation is lethal [Source:SGD;Acc:S000003103]
RPL1A (YPL220W)		N-terminally acetylated protein component of the large (60S) ribosomal subunit, nearly identical to Rpl1Bp and has similarity to E. coli L1 and rat L10a ribosomal proteins; rpl1a rpl1b double null mutation is lethal [Source:SGD;Acc:S000006141]
RPL7B (YPL198W)		Protein component of the large (60S) ribosomal subunit, nearly identical to Rpl7Ap and has similarity to E. coli L30 and rat L7 ribosomal proteins; contains a conserved C-terminal Nucleic acid Binding Domain (NDB2) [Source:SGD;Acc:S000006119]
RPL31A (YDL075W)		Protein component of the large (60S) ribosomal subunit, nearly identical to Rpl31Bp and has similarity to rat L31 ribosomal protein; associates with the karyopherin Sxm1p; loss of both Rpl31p and Rpl39p confers lethality [Source:SGD;Acc:S000002233]
YNR034W-A		Putative protein of unknown function; expression is regulated by Msn2p/Msn4p [Source:SGD;Acc:S000007525]
RPS19A (YOL121C)		Protein component of the small (40S) ribosomal subunit, required for assembly and maturation of pre-40 S particles; mutations in human RPS19 are associated with Diamond Blackfan anemia; nearly identical to Rps19Bp [Source:SGD;Acc:S000005481]
RPL34A (YER056C-A)		Protein component of the large (60S) ribosomal subunit, nearly identical to Rpl34Bp and has similarity to rat L34 ribosomal protein [Source:SGD;Acc:S000002135]
RPL21A (YBR191W)		Protein component of the large (60S) ribosomal subunit, nearly identical to Rpl21Bp and has similarity to rat L21 ribosomal protein [Source:SGD;Acc:S000000395]
RPL33A (YPL143W)		N-terminally acetylated ribosomal protein L37 of the large (60S) ribosomal subunit, nearly identical to Rpl33Bp and has similarity to rat L35a; rpl33a null mutant exhibits slow growth while rpl33a rpl33b double null mutant is inviable [Source:SGD;Acc:S000006064]
RPS19B (YNL302C)		Protein component of the small (40S) ribosomal subunit, required for assembly and maturation of pre-40 S particles; mutations in human RPS19 are associated with Diamond Blackfan anemia; nearly identical to Rps19Ap [Source:SGD;Acc:S000005246]
RPS7A (YOR096W)		Protein component of the small (40S) ribosomal subunit, nearly identical to Rps7Bp; interacts with Kti11p; deletion causes hypersensitivity to zymocin; has similarity to rat S7 and Xenopus S8 ribosomal proteins [Source:SGD;Acc:S000005622]
RPS17A (YML024W)		Ribosomal protein 51 (rp51) of the small (40s) subunit; nearly identical to Rps17Bp and has similarity to rat S17 ribosomal protein [Source:SGD;Acc:S000004486]
RPS17B (YDR447C)		Ribosomal protein 51 (rp51) of the small (40s) subunit; nearly identical to Rps17Ap and has similarity to rat S17 ribosomal protein [Source:SGD;Acc:S000002855]
RPS10A (YOR293W)		Protein component of the small (40S) ribosomal subunit; nearly identical to Rps10Bp and has similarity to rat ribosomal protein S10 [Source:SGD;Acc:S000005819]
RPL32 (YBL092W)		Protein component of the large (60S) ribosomal subunit, has similarity to rat L32 ribosomal protein; overexpression disrupts telomeric silencing [Source:SGD;Acc:S000000188]
RPL25 (YOL127W)		Primary rRNA-binding ribosomal protein component of the large (60S) ribosomal subunit, has similarity to E. coli L23 and rat L23a ribosomal proteins; binds to 25S rRNA via a conserved C-terminal motif [Source:SGD;Acc:S000005487]
RPL14B (YHL001W)		Protein component of the large (60S) ribosomal subunit, nearly identical to Rpl14Ap and has similarity to rat L14 ribosomal protein [Source:SGD;Acc:S000000993]
RPL16B (YNL069C)		N-terminally acetylated protein component of the large (60S) ribosomal subunit, binds to 5.8 S rRNA; has similarity to Rpl16Ap, E. coli L13 and rat L13a ribosomal proteins; transcriptionally regulated by Rap1p [Source:SGD;Acc:S000005013]
RPS12 (YOR369C)		Protein component of the small (40S) ribosomal subunit; has similarity to rat ribosomal protein S12 [Source:SGD;Acc:S000005896]
RPL17A (YKL180W)		Protein component of the large (60S) ribosomal subunit, nearly identical to Rpl17Bp and has similarity to E. coli L22 and rat L17 ribosomal proteins; copurifies with the Dam1 complex (aka DASH complex) [Source:SGD;Acc:S000001663]
RPS5 (YJR123W)		Protein component of the small (40S) ribosomal subunit, the least basic of the non-acidic ribosomal proteins; phosphorylated in vivo; essential for viability; has similarity to E. coli S7 and rat S5 ribosomal proteins [Source:SGD;Acc:S000003884]
RPS13 (YDR064W)		Protein component of the small (40S) ribosomal subunit; has similarity to E. coli S15 and rat S13 ribosomal proteins [Source:SGD;Acc:S000002471]
RPL30 (YGL030W)		Protein component of the large (60S) ribosomal subunit, has similarity to rat L30 ribosomal protein; involved in pre-rRNA processing in the nucleolus; autoregulates splicing of its transcript [Source:SGD;Acc:S000002998]
RPL27A (YHR010W)		Protein component of the large (60S) ribosomal subunit, nearly identical to Rpl27Bp and has similarity to rat L27 ribosomal protein [Source:SGD;Acc:S000001052]
RPL6A (YML073C)		N-terminally acetylated protein component of the large (60S) ribosomal subunit, has similarity to Rpl6Bp and to rat L6 ribosomal protein; binds to 5.8S rRNA [Source:SGD;Acc:S000004538]
RPL11A (YPR102C)		Protein of the large 60S ribosomal subunit, nearly identical to Rpl11Bp but expressed at twice the level; involved in ribosomal assembly; depletion causes degradation of 60S proteins and RNA; similar to E. coli L5 and rat L11 [Source:SGD;Acc:S000006306]
RPS20 (YHL015W)		Protein component of the small (40S) ribosomal subunit; overproduction suppresses mutations affecting RNA polymerase III-dependent transcription; has similarity to E. coli S10 and rat S20 ribosomal proteins [Source:SGD;Acc:S000001007]
RPL28 (YGL103W)		Ribosomal protein of the large (60S) ribosomal subunit, has similarity to E. coli L15 and rat L27a ribosomal proteins; may have peptidyl transferase activity; can mutate to cycloheximide resistance [Source:SGD;Acc:S000003071]
RPS15 (YOL040C)		Protein component of the small (40S) ribosomal subunit; has similarity to E. coli S19 and rat S15 ribosomal proteins [Source:SGD;Acc:S000005400]
RPP1B (YDL130W)		Ribosomal protein P1 beta, component of the ribosomal stalk, which is involved in interaction of translational elongation factors with ribosome; accumulation is regulated by phosphorylation and interaction with the P2 stalk component [Source:SGD;Acc:S000002288]
RPL26B (YGR034W)		Protein component of the large (60S) ribosomal subunit, nearly identical to Rpl26Ap and has similarity to E. coli L24 and rat L26 ribosomal proteins; binds to 5.8S rRNA [Source:SGD;Acc:S000003266]
RPS9B (YBR189W)		Protein component of the small (40S) ribosomal subunit; nearly identical to Rps9Ap and has similarity to E. coli S4 and rat S9 ribosomal proteins [Source:SGD;Acc:S000000393]
RPS10B (YMR230W)		Protein component of the small (40S) ribosomal subunit; nearly identical to Rps10Ap and has similarity to rat ribosomal protein S10 [Source:SGD;Acc:S000004843]
RPS21B (YJL136C)		Protein component of the small (40S) ribosomal subunit; nearly identical to Rps21Ap and has similarity to rat S21 ribosomal protein [Source:SGD;Acc:S000003672]
RPS2 (YGL123W)		Protein component of the small (40S) subunit, essential for control of translational accuracy; phosphorylation by C-terminal domain kinase I (CTDK-I) enhances translational accuracy; methylated on one or more arginine residues by Hmt1p [Source:SGD;Acc:S000003091]
RPL7A (YGL076C)		Protein component of the large (60S) ribosomal subunit, nearly identical to Rpl7Bp and has similarity to E. coli L30 and rat L7 ribosomal proteins; contains a conserved C-terminal Nucleic acid Binding Domain (NDB2) [Source:SGD;Acc:S000003044]
RPS25B (YLR333C)		Protein component of the small (40S) ribosomal subunit; nearly identical to Rps25Ap and has similarity to rat S25 ribosomal protein [Source:SGD;Acc:S000004325]
RPS1A (YLR441C)		Ribosomal protein 10 (rp10) of the small (40S) subunit; nearly identical to Rps1Bp and has similarity to rat S3a ribosomal protein [Source:SGD;Acc:S000004433]
RPS3 (YNL178W)		Protein component of the small (40S) ribosomal subunit, has apurinic/apyrimidinic (AP) endonuclease activity; essential for viability; has similarity to E. coli S3 and rat S3 ribosomal proteins [Source:SGD;Acc:S000005122]
RPL14A (YKL006W)		N-terminally acetylated protein component of the large (60S) ribosomal subunit, nearly identical to Rpl14Bp and has similarity to rat L14 ribosomal protein; rpl14a csh5 double null mutant exhibits synthetic slow growth [Source:SGD;Acc:S000001489]
RPL31B (YLR406C)		Protein component of the large (60S) ribosomal subunit, nearly identical to Rpl31Ap and has similarity to rat L31 ribosomal protein; associates with the karyopherin Sxm1p; loss of both Rpl31p and Rpl39p confers lethality [Source:SGD;Acc:S000004398]
RPP2B (YDR382W)		Ribosomal protein P2 beta, a component of the ribosomal stalk, which is involved in the interaction between translational elongation factors and the ribosome; regulates the accumulation of P1 (Rpp1Ap and Rpp1Bp) in the cytoplasm [Source:SGD;Acc:S000002790]
RPL34B (YIL052C)		Protein component of the large (60S) ribosomal subunit, nearly identical to Rpl34Ap and has similarity to rat L34 ribosomal protein [Source:SGD;Acc:S000001314]
RPL3 (YOR063W)		Protein component of the large (60S) ribosomal subunit, has similarity to E. coli L3 and rat L3 ribosomal proteins; involved in the replication and maintenance of killer double stranded RNA virus [Source:SGD;Acc:S000005589]
RPS29A (YLR388W)		Protein component of the small (40S) ribosomal subunit; nearly identical to Rps29Bp and has similarity to rat S29 and E. coli S14 ribosomal proteins [Source:SGD;Acc:S000004380]
RPL38 (YLR325C)		Protein component of the large (60S) ribosomal subunit, has similarity to rat L38 ribosomal protein [Source:SGD;Acc:S000004317]
RPS21A (YKR057W)		Protein component of the small (40S) ribosomal subunit; nearly identical to Rps21Bp and has similarity to rat S21 ribosomal protein [Source:SGD;Acc:S000001765]
RPL24B (YGR148C)		Ribosomal protein L30 of the large (60S) ribosomal subunit, nearly identical to Rpl24Ap and has similarity to rat L24 ribosomal protein; not essential for translation but may be required for normal translation rate [Source:SGD;Acc:S000003380]
ASC1 (YMR116C)		G-protein beta subunit and guanine nucleotide dissociation inhibitor for Gpa2p; ortholog of RACK1 that inhibits translation; core component of the small (40S) ribosomal subunit; represses Gcn4p in the absence of amino acid starvation [Source:SGD;Acc:S000004722]
RPS22A (YJL190C)		Protein component of the small (40S) ribosomal subunit; nearly identical to Rps22Bp and has similarity to E. coli S8 and rat S15a ribosomal proteins [Source:SGD;Acc:S000003726]
RPL24A (YGL031C)		Ribosomal protein L30 of the large (60S) ribosomal subunit, nearly identical to Rpl24Bp and has similarity to rat L24 ribosomal protein; not essential for translation but may be required for normal translation rate [Source:SGD;Acc:S000002999]
RPL8A (YHL033C)		Ribosomal protein L4 of the large (60S) ribosomal subunit, nearly identical to Rpl8Bp and has similarity to rat L7a ribosomal protein; mutation results in decreased amounts of free 60S subunits [Source:SGD;Acc:S000001025]
RPP2A (YOL039W)		Ribosomal protein P2 alpha, a component of the ribosomal stalk, which is involved in the interaction between translational elongation factors and the ribosome; regulates the accumulation of P1 (Rpp1Ap and Rpp1Bp) in the cytoplasm [Source:SGD;Acc:S000005399]
RPS1B (YML063W)		Ribosomal protein 10 (rp10) of the small (40S) subunit; nearly identical to Rps1Ap and has similarity to rat S3a ribosomal protein [Source:SGD;Acc:S000004528]
EFB1 (YAL003W)		Translation elongation factor 1 beta; stimulates nucleotide exchange to regenerate EF-1 alpha-GTP for the next elongation cycle; part of the EF-1 complex, which facilitates binding of aminoacyl-tRNA to the ribosomal A site [Source:SGD;Acc:S000000003]
RPS25A (YGR027C)		Protein component of the small (40S) ribosomal subunit; nearly identical to Rps25Bp and has similarity to rat S25 ribosomal protein [Source:SGD;Acc:S000003259]
RPL17B (YJL177W)		Protein component of the large (60S) ribosomal subunit, nearly identical to Rpl17Ap and has similarity to E. coli L22 and rat L17 ribosomal proteins [Source:SGD;Acc:S000003713]
RPL8B (YLL045C)		Ribosomal protein L4 of the large (60S) ribosomal subunit, nearly identical to Rpl8Ap and has similarity to rat L7a ribosomal protein; mutation results in decreased amounts of free 60S subunits [Source:SGD;Acc:S000003968]
RPL22B (YFL034C-A)		Protein component of the large (60S) ribosomal subunit, has similarity to Rpl22Ap and to rat L22 ribosomal protein [Source:SGD;Acc:S000006436]
RPL10 (YLR075W)		Protein component of the large (60S) ribosomal subunit, responsible for joining the 40S and 60S subunits; regulates translation initiation; has similarity to rat L10 ribosomal protein and to members of the QM gene family [Source:SGD;Acc:S000004065]
RPL11B (YGR085C)		Protein component of the large (60S) ribosomal subunit, nearly identical to Rpl11Ap; involved in ribosomal assembly; depletion causes degradation of proteins and RNA of the 60S subunit; has similarity to E. coli L5 and rat L11 [Source:SGD;Acc:S000003317]
RPL26A (YLR344W)		Protein component of the large (60S) ribosomal subunit, nearly identical to Rpl26Bp and has similarity to E. coli L24 and rat L26 ribosomal proteins; binds to 5.8S rRNA [Source:SGD;Acc:S000004336]
RPL21B (YPL079W)		Protein component of the large (60S) ribosomal subunit, nearly identical to Rpl21Ap and has similarity to rat L21 ribosomal protein [Source:SGD;Acc:S000006000]
RPS7B (YNL096C)		Protein component of the small (40S) ribosomal subunit, nearly identical to Rps7Ap; interacts with Kti11p; deletion causes hypersensitivity to zymocin; has similarity to rat S7 and Xenopus S8 ribosomal proteins [Source:SGD;Acc:S000005040]
RPL33B (YOR234C)		Ribosomal protein L37 of the large (60S) ribosomal subunit, nearly identical to Rpl33Ap and has similarity to rat L35a; rpl33b null mutant exhibits normal growth while rpl33a rpl33b double null mutant is inviable [Source:SGD;Acc:S000005760]
RPL22A (YLR061W)		Protein component of the large (60S) ribosomal subunit, has similarity to Rpl22Bp and to rat L22 ribosomal protein [Source:SGD;Acc:S000004051]
RPL9B (YNL067W)		Protein component of the large (60S) ribosomal subunit, nearly identical to Rpl9Ap and has similarity to E. coli L6 and rat L9 ribosomal proteins [Source:SGD;Acc:S000005011]
RPL27B (YDR471W)		Protein component of the large (60S) ribosomal subunit, nearly identical to Rpl27Ap and has similarity to rat L27 ribosomal protein [Source:SGD;Acc:S000002879]
RPS22B (YLR367W)		Protein component of the small (40S) ribosomal subunit; nearly identical to Rps22Ap and has similarity to E. coli S8 and rat S15a ribosomal proteins [Source:SGD;Acc:S000004359]
RPL9A (YGL147C)		Protein component of the large (60S) ribosomal subunit, nearly identical to Rpl9Bp and has similarity to E. coli L6 and rat L9 ribosomal proteins [Source:SGD;Acc:S000003115]
RPL4B (YDR012W)		Protein component of the large (60S) ribosomal subunit, nearly identical to Rpl4Ap and has similarity to E. coli L4 and rat L4 ribosomal proteins [Source:SGD;Acc:S000002419]
RPL6B (YLR448W)		Protein component of the large (60S) ribosomal subunit, has similarity to Rpl6Ap and to rat L6 ribosomal protein; binds to 5.8S rRNA [Source:SGD;Acc:S000004440]
RPL16A (YIL133C)		N-terminally acetylated protein component of the large (60S) ribosomal subunit, binds to 5.8 S rRNA; has similarity to Rpl16Bp, E. coli L13 and rat L13a ribosomal proteins; transcriptionally regulated by Rap1p [Source:SGD;Acc:S000001395]
FUR1 (YHR128W)		Uracil phosphoribosyltransferase, synthesizes UMP from uracil; involved in the pyrimidine salvage pathway [Source:SGD;Acc:S000001170]
ADE13 (YLR359W)		Adenylosuccinate lyase, catalyzes two steps in the 'de novo' purine nucleotide biosynthetic pathway; expression is repressed by adenine and activated by Bas1p and Pho2p; mutations in human ortholog ADSL cause adenylosuccinase deficiency [Source:SGD;Acc:S000004351]
SSB2 (YNL209W)		Cytoplasmic ATPase that is a ribosome-associated molecular chaperone, functions with J-protein partner Zuo1p; may be involved in the folding of newly-synthesized polypeptide chains; member of the HSP70 family; homolog of SSB1 [Source:SGD;Acc:S000005153]
TMA19 (YKL056C)		Protein that associates with ribosomes; homolog of translationally controlled tumor protein; green fluorescent protein (GFP)-fusion protein localizes to the cytoplasm and relocates to the mitochondrial outer surface upon oxidative stress [Source:SGD;Acc:S000001539]
STM1 (YLR150W)		Protein required for optimal translation under nutrient stress; perturbs association of Yef3p with ribosomes; involved in TOR signaling; binds G4 quadruplex and purine motif triplex nucleic acid; helps maintain telomere structure [Source:SGD;Acc:S000004140]
RPL4A (YBR031W)		N-terminally acetylated protein component of the large (60S) ribosomal subunit, nearly identical to Rpl4Bp and has similarity to E. coli L4 and rat L4 ribosomal proteins [Source:SGD;Acc:S000000235]
RPS9A (YPL081W)		Protein component of the small (40S) ribosomal subunit; nearly identical to Rps9Bp and has similarity to E. coli S4 and rat S9 ribosomal proteins [Source:SGD;Acc:S000006002]
EGD1 (YPL037C)		Subunit beta1 of the nascent polypeptide-associated complex (NAC) involved in protein targeting, associated with cytoplasmic ribosomes; enhances DNA binding of the Gal4p activator; homolog of human BTF3b [Source:SGD;Acc:S000005958]
GPM1 (YKL152C)		Tetrameric phosphoglycerate mutase, mediates the conversion of 3-phosphoglycerate to 2-phosphoglycerate during glycolysis and the reverse reaction during gluconeogenesis [Source:SGD;Acc:S000001635]
ATP16 (YDL004W)		Delta subunit of the central stalk of mitochondrial F1F0 ATP synthase, which is a large, evolutionarily conserved enzyme complex required for ATP synthesis; phosphorylated [Source:SGD;Acc:S000002162]
ADE17 (YMR120C)		Enzyme of 'de novo' purine biosynthesis containing both 5-aminoimidazole-4-carboxamide ribonucleotide transformylase and inosine monophosphate cyclohydrolase activities, isozyme of Ade16p; ade16 ade17 mutants require adenine and histidine [Source:SGD;Acc:S000004727]
ADE12 (YNL220W)		Adenylosuccinate synthase, catalyzes the first step in synthesis of adenosine monophosphate from inosine 5'monophosphate during purine nucleotide biosynthesis; exhibits binding to single-stranded autonomously replicating (ARS) core sequence [Source:SGD;Acc:S000005164]
ATP3 (YBR039W)		Gamma subunit of the F1 sector of mitochondrial F1F0 ATP synthase, which is a large, evolutionarily conserved enzyme complex required for ATP synthesis [Source:SGD;Acc:S000000243]
EGD2 (YHR193C)		Alpha subunit of the heteromeric nascent polypeptide-associated complex (NAC) involved in protein sorting and translocation, associated with cytoplasmic ribosomes [Source:SGD;Acc:S000001236]
PFK2 (YMR205C)		Beta subunit of heterooctameric phosphofructokinase involved in glycolysis, indispensable for anaerobic growth, activated by fructose-2,6-bisphosphate and AMP, mutation inhibits glucose induction of cell cycle-related genes [Source:SGD;Acc:S000004818]
DYS1 (YHR068W)		Deoxyhypusine synthase, catalyzes formation of deoxyhypusine, the first step in hypusine biosynthesis; triggers posttranslational hypusination of translation elongation factor eIF-5A and regulates its intracellular levels; tetrameric [Source:SGD;Acc:S000001110]
HMF1 (YER057C)		Member of the p14.5 protein family with similarity to Mmf1p, functionally complements Mmf1p function when targeted to mitochondria; heat shock inducible; high-dosage growth inhibitor; forms a homotrimer in vitro [Source:SGD;Acc:S000000859]
RIB4 (YOL143C)		Lumazine synthase (6,7-dimethyl-8-ribityllumazine synthase, also known as DMRL synthase); catalyzes synthesis of immediate precursor to riboflavin [Source:SGD;Acc:S000005503]
ADE1 (YAR015W)		N-succinyl-5-aminoimidazole-4-carboxamide ribotide (SAICAR) synthetase, required for 'de novo' purine nucleotide biosynthesis; red pigment accumulates in mutant cells deprived of adenine [Source:SGD;Acc:S000000070]
SES1 (YDR023W)		Cytosolic seryl-tRNA synthetase, class II aminoacyl-tRNA synthetase that aminoacylates tRNA(Ser), displays tRNA-dependent amino acid recognition which enhances discrimination of the serine substrate, interacts with peroxin Pex21p [Source:SGD;Acc:S000002430]
IMD2 (YHR216W)		Inosine monophosphate dehydrogenase, catalyzes the rate-limiting step in GTP biosynthesis, expression is induced by mycophenolic acid resulting in resistance to the drug, expression is repressed by nutrient limitatio [Source:SGD;Acc:S000001259]
ADH1 (YOL086C)		Alcohol dehydrogenase, fermentative isozyme active as homo- or heterotetramers; required for the reduction of acetaldehyde to ethanol, the last step in the glycolytic pathway [Source:SGD;Acc:S000005446]
GLN1 (YPR035W)		Glutamine synthetase (GS), synthesizes glutamine from glutamate and ammonia; with Glt1p, forms the secondary pathway for glutamate biosynthesis from ammonia; expression regulated by nitrogen source and by amino acid limitation [Source:SGD;Acc:S000006239]
ZEO1 (YOL109W)		Peripheral membrane protein of the plasma membrane that interacts with Mid2p; regulates the cell integrity pathway mediated by Pkc1p and Slt2p; the authentic protein is detected in a phosphorylated state in highly purified mitochondria [Source:SGD;Acc:S000005469]
HXK2 (YGL253W)		Hexokinase isoenzyme 2 that catalyzes phosphorylation of glucose in the cytosol; predominant hexokinase during growth on glucose; functions in the nucleus to repress expression of HXK1 and GLK1 and to induce expression of its own gene [Source:SGD;Acc:S000003222]
APE2 (YKL157W)		Aminopeptidase yscII; may have a role in obtaining leucine from dipeptide substrates; sequence coordinates have changed since RT-PCR analysis showed that the adjacent ORF YKL158W comprises the 5' exon of APE2/YKL157W [Source:SGD;Acc:S000001640]
IMD4 (YML056C)		Inosine monophosphate dehydrogenase, catalyzes the first step of GMP biosynthesis, member of a four-gene family in S. cerevisiae, constitutively expressed [Source:SGD;Acc:S000004520]
COF1 (YLL050C)		Cofilin, promotes actin filament depolarization in a pH-dependent manner; binds both actin monomers and filaments and severs filaments; thought to be regulated by phosphorylation at SER4; ubiquitous and essential in eukaryotes [Source:SGD;Acc:S000003973]
ATP1 (YBL099W)		Alpha subunit of the F1 sector of mitochondrial F1F0 ATP synthase, which is a large, evolutionarily conserved enzyme complex required for ATP synthesis; phosphorylated [Source:SGD;Acc:S000000195]
PAB1 (YER165W)		Poly(A) binding protein, part of the 3'-end RNA-processing complex, mediates interactions between the 5' cap structure and the 3' mRNA poly(A) tail, involved in control of poly(A) tail length, interacts with translation factor eIF-4G [Source:SGD;Acc:S000000967]
MMF1 (YIL051C)		Mitochondrial protein required for transamination of isoleucine but not of valine or leucine; may regulate specificity of branched-chain transaminases Bat1p and Bat2p; interacts genetically with mitochondrial ribosomal protein genes [Source:SGD;Acc:S000001313]
KRS1 (YDR037W)		Lysyl-tRNA synthetase [Source:SGD;Acc:S000002444]
COR1 (YBL045C)		Core subunit of the ubiquinol-cytochrome c reductase complex (bc1 complex), which is a component of the mitochondrial inner membrane electron transport chain [Source:SGD;Acc:S000000141]
DED81 (YHR019C)		Cytosolic asparaginyl-tRNA synthetase, required for protein synthesis, catalyzes the specific attachment of asparagine to its cognate tRNA [Source:SGD;Acc:S000001061]
GSP1 (YLR293C)		Ran GTPase, GTP binding protein (mammalian Ranp homolog) involved in the maintenance of nuclear organization, RNA processing and transport; regulated by Srm1p, Rna1p, Yrb1p, Yrb2p, Yrp4p, Yrb30p, Cse1p and Kap95p; yeast Gsp2p homolog [Source:SGD;Acc:S000004284]
FRS2 (YFL022C)		Alpha subunit of cytoplasmic phenylalanyl-tRNA synthetase, forms a tetramer with Frs1p to form active enzyme; evolutionarily distant from mitochondrial phenylalanyl-tRNA synthetase based on protein sequence, but substrate binding is similar [Source:SGD;Acc:S000001872]
TIF3 (YPR163C)		Translation initiation factor eIF-4B, has RNA annealing activity; contains an RNA recognition motif and binds to single-stranded RNA [Source:SGD;Acc:S000006367]
GDH1 (YOR375C)		NADP(+)-dependent glutamate dehydrogenase, synthesizes glutamate from ammonia and alpha-ketoglutarate; rate of alpha-ketoglutarate utilization differs from Gdh3p; expression regulated by nitrogen and carbon sources [Source:SGD;Acc:S000005902]
SSB1 (YDL229W)		Cytoplasmic ATPase that is a ribosome-associated molecular chaperone, functions with J-protein partner Zuo1p; may be involved in folding of newly-made polypeptide chains; member of the HSP70 family; interacts with phosphatase subunit Reg1p [Source:SGD;Acc:S000002388]
TPM1 (YNL079C)		Major isoform of tropomyosin; binds to and stabilizes actin cables and filaments, which direct polarized cell growth and the distribution of several organelles; acetylated by the NatB complex and acetylated form binds actin most efficiently [Source:SGD;Acc:S000005023]
SEC53 (YFL045C)		Phosphomannomutase, involved in synthesis of GDP-mannose and dolichol-phosphate-mannose; required for folding and glycosylation of secretory proteins in the ER lumen [Source:SGD;Acc:S000001849]
ADE5,7 (YGL234W)		Bifunctional enzyme of the 'de novo' purine nucleotide biosynthetic pathway, contains aminoimidazole ribotide synthetase and glycinamide ribotide synthetase activities [Source:SGD;Acc:S000003203]
BFR1 (YOR198C)		Component of mRNP complexes associated with polyribosomes; implicated in secretion and nuclear segregation; multicopy suppressor of BFA (Brefeldin A) sensitivity [Source:SGD;Acc:S000005724]
HSP150 (YJL159W)		O-mannosylated heat shock protein that is secreted and covalently attached to the cell wall via beta-1,3-glucan and disulfide bridges; required for cell wall stability; induced by heat shock, oxidative stress, and nitrogen limitation [Source:SGD;Acc:S000003695]
KRE2 (YDR483W)		Alpha1,2-mannosyltransferase of the Golgi involved in protein mannosylation [Source:SGD;Acc:S000002891]
YHR020W		Protein of unknown function that may interact with ribosomes, based on co-purification experiments; has similarity to proline-tRNA ligase; YHR020W is an essential gene [Source:SGD;Acc:S000001062]
NOP1 (YDL014W)		Nucleolar protein, component of the small subunit processome complex, which is required for processing of pre-18S rRNA; has similarity to mammalian fibrillarin [Source:SGD;Acc:S000002172]
KGD1 (YIL125W)		Component of the mitochondrial alpha-ketoglutarate dehydrogenase complex, which catalyzes a key step in the tricarboxylic acid (TCA) cycle, the oxidative decarboxylation of alpha-ketoglutarate to form succinyl-CoA [Source:SGD;Acc:S000001387]
PGI1 (YBR196C)		Glycolytic enzyme phosphoglucose isomerase, catalyzes the interconversion of glucose-6-phosphate and fructose-6-phosphate; required for cell cycle progression and completion of the gluconeogenic events of sporulation [Source:SGD;Acc:S000000400]
VMA1 (YDL185W)		Subunit A of the eight-subunit V1 peripheral membrane domain of the vacuolar H+-ATPase; protein precursor undergoes self-catalyzed splicing to yield the extein Tfp1p and the intein Vde (PI-SceI), which is a site-specific endonuclease [Source:SGD;Acc:S000002344]
RHR2 (YIL053W)		Constitutively expressed isoform of DL-glycerol-3-phosphatase; involved in glycerol biosynthesis, induced in response to both anaerobic and, along with the Hor2p/Gpp2p isoform, osmotic stress [Source:SGD;Acc:S000001315]
YRB1 (YDR002W)		Ran GTPase binding protein; involved in nuclear protein import and RNA export, ubiquitin-mediated protein degradation during the cell cycle; shuttles between the nucleus and cytoplasm; is essential; homolog of human RanBP1 [Source:SGD;Acc:S000002409]
CDC60 (YPL160W)		Cytosolic leucyl tRNA synthetase, ligates leucine to the appropriate tRNA [Source:SGD;Acc:S000006081]
HSP10 (YOR020C)		Mitochondrial matrix co-chaperonin that inhibits the ATPase activity of Hsp60p, a mitochondrial chaperonin; involved in protein folding and sorting in the mitochondria; 10 kD heat shock protein with similarity to E. coli groES [Source:SGD;Acc:S000005546]
SHM2 (YLR058C)		Cytosolic serine hydroxymethyltransferase, converts serine to glycine plus 5,10 methylenetetrahydrofolate; major isoform involved in generating precursors for purine, pyrimidine, amino acid, and lipid biosynthesis [Source:SGD;Acc:S000004048]
TDH1 (YJL052W)		Glyceraldehyde-3-phosphate dehydrogenase, isozyme 1, involved in glycolysis and gluconeogenesis; tetramer that catalyzes the reaction of glyceraldehyde-3-phosphate to 1,3 bis-phosphoglycerate; detected in the cytoplasm and cell wall [Source:SGD;Acc:S000003588]
SAH1 (YER043C)		S-adenosyl-L-homocysteine hydrolase, catabolizes S-adenosyl-L-homocysteine which is formed after donation of the activated methyl group of S-adenosyl-L-methionine (AdoMet) to an acceptor [Source:SGD;Acc:S000000845]
THR4 (YCR053W)		Threonine synthase, conserved protein that catalyzes formation of threonine from O-phosphohomoserine; expression is regulated by the GCN4-mediated general amino acid control pathway [Source:SGD;Acc:S000000649]
CYS4 (YGR155W)		Cystathionine beta-synthase, catalyzes synthesis of cystathionine from serine and homocysteine, the first committed step in cysteine biosynthesis; responsible for hydrogen sulfide generation; mutations in human ortholog cause homocystinuria [Source:SGD;Acc:S000003387]
SEC31 (YDL195W)		Component of the Sec13p-Sec31p complex of the COPII vesicle coat, required for vesicle formation in ER to Golgi transport; mutant has increased aneuploidy tolerance [Source:SGD;Acc:S000002354]
GLT1 (YDL171C)		NAD(+)-dependent glutamate synthase (GOGAT), synthesizes glutamate from glutamine and alpha-ketoglutarate; with Gln1p, forms the secondary pathway for glutamate biosynthesis from ammonia; expression regulated by nitrogen source [Source:SGD;Acc:S000002330]
TSA1 (YML028W)		Thioredoxin peroxidase, acts as both a ribosome-associated and free cytoplasmic antioxidant; self-associates to form a high-molecular weight chaperone complex under oxidative stress; deletion results in mutator phenotype [Source:SGD;Acc:S000004490]
SHM1 (YBR263W)		Mitochondrial serine hydroxymethyltransferase, converts serine to glycine plus 5,10 methylenetetrahydrofolate; involved in generating precursors for purine, pyrimidine, amino acid, and lipid biosynthesis; reverse reaction generates serine [Source:SGD;Acc:S000000467]
ERG10 (YPL028W)		Acetyl-CoA C-acetyltransferase (acetoacetyl-CoA thiolase), cytosolic enzyme that transfers an acetyl group from one acetyl-CoA molecule to another, forming acetoacetyl-CoA; involved in the first step in mevalonate biosynthesis [Source:SGD;Acc:S000005949]
ATP2 (YJR121W)		Beta subunit of the F1 sector of mitochondrial F1F0 ATP synthase, which is a large, evolutionarily conserved enzyme complex required for ATP synthesis; phosphorylated [Source:SGD;Acc:S000003882]
VMA4 (YOR332W)		Subunit E of the eight-subunit V1 peripheral membrane domain of the vacuolar H+-ATPase (V-ATPase), an electrogenic proton pump found throughout the endomembrane system; required for the V1 domain to assemble onto the vacuolar membrane [Source:SGD;Acc:S000005859]
IPP1 (YBR011C)		Cytoplasmic inorganic pyrophosphatase (PPase), homodimer that catalyzes the rapid exchange of oxygens from Pi with water, highly expressed and essential for viability, active-site residues show identity to those from E. coli PPase [Source:SGD;Acc:S000000215]
FRS1 (YLR060W)		Beta subunit of cytoplasmic phenylalanyl-tRNA synthetase, forms a tetramer with Frs2p to generate active enzyme; able to hydrolyze mis-aminoacylated tRNA-Phe, which could contribute to translational quality control [Source:SGD;Acc:S000004050]
THS1 (YIL078W)		Threonyl-tRNA synthetase, essential cytoplasmic protein [Source:SGD;Acc:S000001340]
VMA2 (YBR127C)		Subunit B of the eight-subunit V1 peripheral membrane domain of the vacuolar H+-ATPase (V-ATPase), an electrogenic proton pump found throughout the endomembrane system; contains nucleotide binding sites; also detected in the cytoplasm [Source:SGD;Acc:S000000331]
MET6 (YER091C)		Cobalamin-independent methionine synthase, involved in methionine biosynthesis and regeneration; requires a minimum of two glutamates on the methyltetrahydrofolate substrate, similar to bacterial metE homologs [Source:SGD;Acc:S000000893]
CPR3 (YML078W)		Mitochondrial peptidyl-prolyl cis-trans isomerase (cyclophilin), catalyzes the cis-trans isomerization of peptide bonds N-terminal to proline residues; involved in protein refolding after import into mitochondria [Source:SGD;Acc:S000004543]
ABF2 (YMR072W)		Mitochondrial DNA-binding protein involved in mitochondrial DNA replication and recombination, member of HMG1 DNA-binding protein family; activity may be regulated by protein kinase A phosphorylation [Source:SGD;Acc:S000004676]
QCR2 (YPR191W)		Subunit 2 of the ubiquinol cytochrome-c reductase complex, which is a component of the mitochondrial inner membrane electron transport chain; phosphorylated; transcription is regulated by Hap1p, Hap2p/Hap3p, and heme [Source:SGD;Acc:S000006395]
ILV2 (YMR108W)		Acetolactate synthase, catalyses the first common step in isoleucine and valine biosynthesis and is the target of several classes of inhibitors, localizes to the mitochondria; expression of the gene is under general amino acid control [Source:SGD;Acc:S000004714]
LPD1 (YFL018C)		Dihydrolipoamide dehydrogenase, the lipoamide dehydrogenase component (E3) of the pyruvate dehydrogenase and 2-oxoglutarate dehydrogenase multi-enzyme complexes [Source:SGD;Acc:S000001876]
ATP5 (YDR298C)		Subunit 5 of the stator stalk of mitochondrial F1F0 ATP synthase, which is an evolutionarily conserved enzyme complex required for ATP synthesis; homologous to bovine subunit OSCP (oligomycin sensitivity-conferring protein); phosphorylated [Source:SGD;Acc:S000002706]
PIR1 (YKL164C)		O-glycosylated protein required for cell wall stability; attached to the cell wall via beta-1,3-glucan; mediates mitochondrial translocation of Apn1p; expression regulated by the cell integrity pathway and by Swi5p during the cell cycle [Source:SGD;Acc:S000001647]
PDB1 (YBR221C)		E1 beta subunit of the pyruvate dehydrogenase (PDH) complex, which is an evolutionarily-conserved multi-protein complex found in mitochondria [Source:SGD;Acc:S000000425]
NHP6A (YPR052C)		High-mobility group (HMG) protein that binds to and remodels nucleosomes; involved in recruiting FACT and other chromatin remodelling complexes to the chromosomes; functionally redundant with Nhp6Bp; homologous to mammalian HMGB1 and HMGB2 [Source:SGD;Acc:S000006256]
HXK1 (YFR053C)		Hexokinase isoenzyme 1, a cytosolic protein that catalyzes phosphorylation of glucose during glucose metabolism; expression is highest during growth on non-glucose carbon sources; glucose-induced repression involves the hexokinase Hxk2p [Source:SGD;Acc:S000001949]
ADE6 (YGR061C)		Formylglycinamidine-ribonucleotide (FGAM)-synthetase, catalyzes a step in the 'de novo' purine nucleotide biosynthetic pathway [Source:SGD;Acc:S000003293]
PFK1 (YGR240C)		Alpha subunit of heterooctameric phosphofructokinase involved in glycolysis, indispensable for anaerobic growth, activated by fructose-2,6-bisphosphate and AMP, mutation inhibits glucose induction of cell cycle-related genes [Source:SGD;Acc:S000003472]
URA2 (YJL130C)		Bifunctional carbamoylphosphate synthetase (CPSase)-aspartate transcarbamylase (ATCase), catalyzes the first two enzymatic steps in the de novo biosynthesis of pyrimidines; both activities are subject to feedback inhibition by UTP [Source:SGD;Acc:S000003666]
YMR027W		Putative protein of unknown function; green fluorescent protein (GFP)-fusion protein localizes to the nucleus and cytoplasm; YMR027W is not an essential gene [Source:SGD;Acc:S000004629]
CIT1 (YNR001C)		Citrate synthase, catalyzes the condensation of acetyl coenzyme A and oxaloacetate to form citrate; the rate-limiting enzyme of the TCA cycle; nuclear encoded mitochondrial protein [Source:SGD;Acc:S000005284]
HOR2 (YER062C)		One of two redundant DL-glycerol-3-phosphatases (RHR2/GPP1 encodes the other) involved in glycerol biosynthesis; induced in response to hyperosmotic stress and oxidative stress, and during the diauxic transition [Source:SGD;Acc:S000000864]
ARO8 (YGL202W)		Aromatic aminotransferase I, expression is regulated by general control of amino acid biosynthesis [Source:SGD;Acc:S000003170]
ARO1 (YDR127W)		Pentafunctional arom protein, catalyzes steps 2 through 6 in the biosynthesis of chorismate, which is a precursor to aromatic amino acids [Source:SGD;Acc:S000002534]
ARC1 (YGL105W)		Protein that binds tRNA and methionyl- and glutamyl-tRNA synthetases (Mes1p and Gus1p), delivering tRNA to them, stimulating catalysis, and ensuring their localization to the cytoplasm; also binds quadruplex nucleic acids [Source:SGD;Acc:S000003073]
SSA4 (YER103W)		Heat shock protein that is highly induced upon stress; plays a role in SRP-dependent cotranslational protein-membrane targeting and translocation; member of the HSP70 family; cytoplasmic protein that concentrates in nuclei upon starvation [Source:SGD;Acc:S000000905]
ADE3 (YGR204W)		Cytoplasmic trifunctional enzyme C1-tetrahydrofolate synthase, involved in single carbon metabolism and required for biosynthesis of purines, thymidylate, methionine, and histidine; null mutation causes auxotrophy for adenine and histidine [Source:SGD;Acc:S000003436]
FUM1 (YPL262W)		Fumarase, converts fumaric acid to L-malic acid in the TCA cycle; cytosolic and mitochondrial distribution determined by the N-terminal targeting sequence, protein conformation, and status of glyoxylate shunt; phosphorylated in mitochondria [Source:SGD;Acc:S000006183]
CYS3 (YAL012W)		Cystathionine gamma-lyase, catalyzes one of the two reactions involved in the transsulfuration pathway that yields cysteine from homocysteine with the intermediary formation of cystathionine [Source:SGD;Acc:S000000010]
SOD2 (YHR008C)		Mitochondrial manganese superoxide dismutase, protects cells against oxygen toxicity; phosphorylated [Source:SGD;Acc:S000001050]
PDI1 (YCL043C)		Protein disulfide isomerase; multifunctional protein resident in the endoplasmic reticulum lumen, essential for the formation of disulfide bonds in secretory and cell-surface proteins, unscrambles non-native disulfide bonds; forms a complex with Mnl /.../t has exomannosidase activity, processing unfolded protein-bound Man8GlcNAc2 oligosaccharides to Man7GlcNAc2 which promotes degradation in the u…
UBA1 (YKL210W)		Ubiquitin activating enzyme (E1), involved in ubiquitin-mediated protein degradation and essential for viability [Source:SGD;Acc:S000001693]
RTC3 (YHR087W)		Protein of unknown function involved in RNA metabolism; has structural similarity to SBDS, the human protein mutated in Shwachman-Diamond Syndrome (the yeast SBDS ortholog = SDO1); null mutation suppresses cdc13-1 temperature sensitivity [Source:SGD;Acc:S000001129]
PRE1 (YER012W)		Beta 4 subunit of the 20S proteasome; localizes to the nucleus throughout the cell cycle [Source:SGD;Acc:S000000814]
LSC1 (YOR142W)		Alpha subunit of succinyl-CoA ligase, which is a mitochondrial enzyme of the TCA cycle that catalyzes the nucleotide-dependent conversion of succinyl-CoA to succinate; phosphorylated [Source:SGD;Acc:S000005668]
CAM1 (YPL048W)		Nuclear protein required for transcription of MXR1; binds the MXR1 promoter in the presence of other nuclear factors; binds calcium and phospholipids; has similarity to translational cofactor EF-1 gamma [Source:SGD;Acc:S000005969]
AAP1 (YHR047C)		Arginine/alanine aminopeptidase, overproduction stimulates glycogen accumulation [Source:SGD;Acc:S000001089]
KGD2 (YDR148C)		Dihydrolipoyl transsuccinylase, component of the mitochondrial alpha-ketoglutarate dehydrogenase complex, which catalyzes the oxidative decarboxylation of alpha-ketoglutarate to succinyl-CoA in the TCA cycle; phosphorylated [Source:SGD;Acc:S000002555]
IDP1 (YDL066W)		Mitochondrial NADP-specific isocitrate dehydrogenase, catalyzes the oxidation of isocitrate to alpha-ketoglutarate; not required for mitochondrial respiration and may function to divert alpha-ketoglutarate to biosynthetic processes [Source:SGD;Acc:S000002224]
PUB1 (YNL016W)		Poly (A)+ RNA-binding protein, abundant mRNP-component protein that binds mRNA and is required for stability of many mRNAs; component of glucose deprivation induced stress granules, involved in P-body-dependent granule assembly [Source:SGD;Acc:S000004961]
ABP1 (YCR088W)		Actin-binding protein of the cortical actin cytoskeleton, important for activation of the Arp2/3 complex that plays a key role actin in cytoskeleton organization [Source:SGD;Acc:S000000684]
SSC1 (YJR045C)		Hsp70 family ATPase, constituent of the import motor component of the Translocase of the Inner Mitochondrial membrane (TIM23 complex); involved in protein translocation and folding; subunit of SceI endonuclease [Source:SGD;Acc:S000003806]
TUF1 (YOR187W)		Mitochondrial translation elongation factor Tu; comprises both GTPase and guanine nucleotide exchange factor activities, while these activities are found in separate proteins in S. pombe and humans [Source:SGD;Acc:S000005713]
BDH1 (YAL060W)		NAD-dependent (R,R)-butanediol dehydrogenase, catalyzes oxidation of (R,R)-2,3-butanediol to (3R)-acetoin, oxidation of meso-butanediol to (3S)-acetoin, and reduction of acetoin; enhances use of 2,3-butanediol as an aerobic carbon source [Source:SGD;Acc:S000000056]
ASN1 (YPR145W)		Asparagine synthetase, isozyme of Asn2p; catalyzes the synthesis of L-asparagine from L-aspartate in the asparagine biosynthetic pathway [Source:SGD;Acc:S000006349]
HCR1 (YLR192C)		Dual function protein involved in translation initiation as a substoichiometric component (eIF3j) of translation initiation factor 3 (eIF3) and required for processing of 20S pre-rRNA; binds to eIF3 subunits Rpg1p and Prt1p and 18S rRNA [Source:SGD;Acc:S000004182]
GPH1 (YPR160W)		Non-essential glycogen phosphorylase required for the mobilization of glycogen, activity is regulated by cyclic AMP-mediated phosphorylation, expression is regulated by stress-response elements and by the HOG MAP kinase pathway [Source:SGD;Acc:S000006364]
TIF5 (YPR041W)		Translation initiation factor eIF5; functions both as a GTPase-activating protein to mediate hydrolysis of ribosome-bound GTP and as a GDP dissociation inhibitor to prevent recycling of eIF2 [Source:SGD;Acc:S000006245]
MDH1 (YKL085W)		Mitochondrial malate dehydrogenase, catalyzes interconversion of malate and oxaloacetate; involved in the tricarboxylic acid (TCA) cycle; phosphorylated [Source:SGD;Acc:S000001568]
UGP1 (YKL035W)		UDP-glucose pyrophosphorylase (UGPase), catalyses the reversible formation of UDP-Glc from glucose 1-phosphate and UTP, involved in a wide variety of metabolic pathways, expression modulated by Pho85p through Pho4p [Source:SGD;Acc:S000001518]
HSP60 (YLR259C)		Tetradecameric mitochondrial chaperonin required for ATP-dependent folding of precursor polypeptides and complex assembly; prevents aggregation and mediates protein refolding after heat shock; role in mtDNA transmission; phosphorylated [Source:SGD;Acc:S000004249]
LAT1 (YNL071W)		Dihydrolipoamide acetyltransferase component (E2) of pyruvate dehydrogenase complex, which catalyzes the oxidative decarboxylation of pyruvate to acetyl-CoA [Source:SGD;Acc:S000005015]
RPG1 (YBR079C)		eIF3a subunit of the core complex of translation initiation factor 3 (eIF3), essential for translation; part of a Prt1p-Rpg1p-Nip1p subcomplex that stimulates binding of mRNA and tRNA(i)Met to ribosomes; involved in translation reinitiation [Source:SGD;Acc:S000000283]
IDH2 (YOR136W)		Subunit of mitochondrial NAD(+)-dependent isocitrate dehydrogenase, which catalyzes the oxidation of isocitrate to alpha-ketoglutarate in the TCA cycle; phosphorylated [Source:SGD;Acc:S000005662]
YDJ1 (YNL064C)		Type I HSP40 co-chaperone involved in regulation of the HSP90 and HSP70 functions; involved in protein translocation across membranes; member of the DnaJ family [Source:SGD;Acc:S000005008]
SSA2 (YLL024C)		ATP binding protein involved in protein folding and vacuolar import of proteins; member of heat shock protein 70 (HSP70) family; associated with the chaperonin-containing T-complex; present in the cytoplasm, vacuolar membrane and cell wall; 98% iden /.../with Ssa1p, but subtle differences between the two proteins provide functional specificity with respect to propagation of yeast [URE3] prions an…
SIS1 (YNL007C)		Type II HSP40 co-chaperone that interacts with the HSP70 protein Ssa1p; not functionally redundant with Ydj1p due to due to substrate specificity; shares similarity with bacterial DnaJ proteins [Source:SGD;Acc:S000004952]
EMI2 (YDR516C)		Non-essential protein of unknown function required for transcriptional induction of the early meiotic-specific transcription factor IME1; required for sporulation; expression is regulated by glucose-repression transcription factors Mig1/2p [Source:SGD;Acc:S000002924]
GSP2 (YOR185C)		GTP binding protein (mammalian Ranp homolog) involved in the maintenance of nuclear organization, RNA processing and transport; interacts with Kap121p, Kap123p and Pdr6p (karyophilin betas); Gsp1p homolog that is not required for viability [Source:SGD;Acc:S000005711]
PYK2 (YOR347C)		Pyruvate kinase that appears to be modulated by phosphorylation; PYK2 transcription is repressed by glucose, and Pyk2p may be active under low glycolytic flux [Source:SGD;Acc:S000005874]
GRX1 (YCL035C)		Hydroperoxide and superoxide-radical responsive heat-stable glutathione-dependent disulfide oxidoreductase with active site cysteine pair; protects cells from oxidative damage [Source:SGD;Acc:S000000540]
NUP2 (YLR335W)		Nucleoporin involved in nucleocytoplasmic transport, binds to either the nucleoplasmic or cytoplasmic faces of the nuclear pore complex depending on Ran-GTP levels; also has a role in chromatin organization [Source:SGD;Acc:S000004327]
MNP1 (YGL068W)		Protein associated with the mitochondrial nucleoid; putative mitochondrial ribosomal protein with similarity to E. coli L7/L12 ribosomal protein; required for normal respiratory growth [Source:SGD;Acc:S000003036]
YNK1 (YKL067W)		Nucleoside diphosphate kinase, catalyzes the transfer of gamma phosphates from nucleoside triphosphates, usually ATP, to nucleoside diphosphates by a mechanism that involves formation of an autophosphorylated enzyme intermediate [Source:SGD;Acc:S000001550]
SSE1 (YPL106C)		ATPase that is a component of the heat shock protein Hsp90 chaperone complex; binds unfolded proteins; member of the heat shock protein 70 (HSP70) family; localized to the cytoplasm [Source:SGD;Acc:S000006027]
YPR1 (YDR368W)		NADPH-dependent aldo-keto reductase, reduces multiple substrates including 2-methylbutyraldehyde and D,L-glyceraldehyde, expression is induced by osmotic and oxidative stress; functionally redundant with other aldo-keto reductases [Source:SGD;Acc:S000002776]
PAA1 (YDR071C)		Polyamine acetyltransferase; acetylates polyamines (e.g. putrescine, spermidine, spermine) and also aralkylamines (e.g. tryptamine, phenylethylamine); may be involved in transcription and/or DNA replication [Source:SGD;Acc:S000002478]
RLI1 (YDR091C)		Essential iron-sulfur protein required for ribosome biogenesis and translation initiation and termination; facilitates binding of a multifactor complex (MFC) of initiation factors to the small ribosomal subunit; predicted ABC family ATPase [Source:SGD;Acc:S000002498]
ARO7 (YPR060C)		Chorismate mutase, catalyzes the conversion of chorismate to prephenate to initiate the tyrosine/phenylalanine-specific branch of aromatic amino acid biosynthesis [Source:SGD;Acc:S000006264]
LAP4 (YKL103C)		Vacuolar aminopeptidase yscI; zinc metalloproteinase that belongs to the peptidase family M18; often used as a marker protein in studies of autophagy and cytosol to vacuole targeting (CVT) pathway [Source:SGD;Acc:S000001586]
GRX2 (YDR513W)		Cytoplasmic glutaredoxin, thioltransferase, glutathione-dependent disulfide oxidoreductase involved in maintaining redox state of target proteins, also exhibits glutathione peroxidase activity, expression induced in response to stress [Source:SGD;Acc:S000002921]
GLC3 (YEL011W)		Glycogen branching enzyme, involved in glycogen accumulation; green fluorescent protein (GFP)-fusion protein localizes to the cytoplasm in a punctate pattern [Source:SGD;Acc:S000000737]
TMA17 (YDL110C)		Protein of unknown function that associates with ribosomes; heterozygous deletion demonstrated increases in chromosome instability in a rad9 deletion background; protein abundance is decreased upon intracellular iron depletion [Source:SGD;Acc:S000002268]
PGM2 (YMR105C)		Phosphoglucomutase, catalyzes the conversion from glucose-1-phosphate to glucose-6-phosphate, which is a key step in hexose metabolism; functions as the acceptor for a Glc-phosphotransferase [Source:SGD;Acc:S000004711]
SSE2 (YBR169C)		Member of the heat shock protein 70 (HSP70) family; may be involved in protein folding; localized to the cytoplasm; highly homologous to the heat shock protein Sse1p [Source:SGD;Acc:S000000373]
RPL13B	15.91	Protein component of the large (60S) ribosomal subunit, nearly identical to Rpl13Ap; not essential for viability; has similarity to rat L13 ribosomal protein [Source:SGD;Acc:S000004750]
RPS31	15.8	Fusion protein that is cleaved to yield a ribosomal protein of the small (40S) subunit and ubiquitin; ubiquitin may facilitate assembly of the ribosomal protein into ribosomes; interacts genetically with translation factor eIF2B [Source:SGD;Acc:S000004157]
RPS0A	15.65	Protein component of the small (40S) ribosomal subunit, nearly identical to Rps0Bp; required for maturation of 18S rRNA along with Rps0Bp; deletion of either RPS0 gene reduces growth rate, deletion of both genes is lethal [Source:SGD;Acc:S000003446]
RPP1A	15.48	Ribosomal stalk protein P1 alpha, involved in the interaction between translational elongation factors and the ribosome; accumulation of P1 in the cytoplasm is regulated by phosphorylation and interaction with the P2 stalk component [Source:SGD;Acc:S000002239]
RPS28A	15.27	Protein component of the small (40S) ribosomal subunit; nearly identical to Rps28Bp and has similarity to rat S28 ribosomal protein [Source:SGD;Acc:S000005693]
RPS26B	15.18	Protein component of the small (40S) ribosomal subunit; nearly identical to Rps26Ap and has similarity to rat S26 ribosomal protein [Source:SGD;Acc:S000000933]
RPL15A	15.08	Protein component of the large (60S) ribosomal subunit, nearly identical to Rpl15Bp and has similarity to rat L15 ribosomal protein; binds to 5.8 S rRNA [Source:SGD;Acc:S000004019]
RPS0B	15	Protein component of the small (40S) ribosomal subunit, nearly identical to Rps0Ap; required for maturation of 18S rRNA along with Rps0Ap; deletion of either RPS0 gene reduces growth rate, deletion of both genes is lethal [Source:SGD;Acc:S000004038]
RPL13A	14.99	Protein component of the large (60S) ribosomal subunit, nearly identical to Rpl13Bp; not essential for viability; has similarity to rat L13 ribosomal protein [Source:SGD;Acc:S000002240]
RPL37A	14.93	Protein component of the large (60S) ribosomal subunit, has similarity to Rpl37Bp and to rat L37 ribosomal protein [Source:SGD;Acc:S000004175]
RPS14A	14.67	Ribosomal protein 59 of the small subunit, required for ribosome assembly and 20S pre-rRNA processing; mutations confer cryptopleurine resistance; nearly identical to Rps14Bp and similar to E. coli S11 and rat S14 ribosomal proteins [Source:SGD;Acc:S000000627]
RPL5	14.4	Protein component of the large (60S) ribosomal subunit with similarity to E. coli L18 and rat L5 ribosomal proteins; binds 5S rRNA and is required for 60S subunit assembly [Source:SGD;Acc:S000006052]
RPS29B	14.1	Protein component of the small (40S) ribosomal subunit; nearly identical to Rps29Ap and has similarity to rat S29 and E. coli S14 ribosomal proteins [Source:SGD;Acc:S000002219]
RPL37B	14.02	Protein component of the large (60S) ribosomal subunit, has similarity to Rpl37Ap and to rat L37 ribosomal protein [Source:SGD;Acc:S000002908]
RPS27B	13.7	Protein component of the small (40S) ribosomal subunit; nearly identical to Rps27Ap and has similarity to rat S27 ribosomal protein [Source:SGD;Acc:S000001063]
RPL39	12.96	Protein component of the large (60S) ribosomal subunit, has similarity to rat L39 ribosomal protein; required for ribosome biogenesis; loss of both Rpl31p and Rpl39p confers lethality; also exhibits genetic interactions with SIS1 and PAB1 [Source:SGD;Acc:S000003725]
RPS26A	12.3	Protein component of the small (40S) ribosomal subunit; nearly identical to Rps26Bp and has similarity to rat S26 ribosomal protein [Source:SGD;Acc:S000003157]
RPL36A	12.02	N-terminally acetylated protein component of the large (60S) ribosomal subunit, nearly identical to Rpl36Bp and has similarity to rat L36 ribosomal protein; binds to 5.8 S rRNA [Source:SGD;Acc:S000004807]
RPP0	11.9	Conserved ribosomal protein P0 of the ribosomal stalk, which is involved in interaction between translational elongation factors and the ribosome; similar to rat P0, human P0, and E. coli L10e; phosphorylated on serine 302 [Source:SGD;Acc:S000004332]
RPS28B	11.48	Protein component of the small (40S) ribosomal subunit; nearly identical to Rps28Ap and has similarity to rat S28 ribosomal protein [Source:SGD;Acc:S000004254]
Network Group	Network	Weight	Title	Authors	Year	Publication	PMID	URL	Processing Method	Interactions	Source	Source URL	Tags
Co-expression		80.53
	Spellman-Futcher-1998	7.68	Comprehensive identification of cell cycle-regulated genes of the yeast Saccharomyces cerevisiae by microarray hybridization.	Spellman, Sherlock, Zhang, Iyer, Anders, Eisen, Brown, Botstein, Futcher	1998	Mol Biol Cell	9843569	http://www.ncbi.nlm.nih.gov/pubmed/9843569	Pearson correlation	168858	SUPPLEMENTARY_MATERIAL		Cell Proliferation
	Gasch-Brown-2001	7.36	Genomic expression responses to DNA-damaging agents and the regulatory role of the yeast ATR homolog Mec1p.	Gasch, Huang, Metzner, Botstein, Elledge, Brown	2001	Mol Biol Cell	11598186	http://www.ncbi.nlm.nih.gov/pubmed/11598186	Pearson correlation	191093	SUPPLEMENTARY_MATERIAL		Signal Transduction
	Gasch-Brown-2000	7.31	Genomic expression programs in the response of yeast cells to environmental changes.	Gasch, Spellman, Kao, Carmel-Harel, Eisen, Storz, Botstein, Brown	2000	Mol Biol Cell	11102521	http://www.ncbi.nlm.nih.gov/pubmed/11102521	Pearson correlation	229946	SUPPLEMENTARY_MATERIAL		Transcription Factors
	Roberts-Friend-2000	6.88	Signaling and circuitry of multiple MAPK pathways revealed by a matrix of global gene expression profiles.	Roberts, Nelson, Marton, Stoughton, Meyer, Bennett, He, Dai, Walker, Hughes, Tyers, Boone, Friend	2000	Science	10657304	http://www.ncbi.nlm.nih.gov/pubmed/10657304	Pearson correlation	184639	SUPPLEMENTARY_MATERIAL		Cell Proliferation,Transcription Factors,Signal Transduction,Cancer
	Hughes-Friend-2000	5.44	Functional discovery via a compendium of expression profiles.	Hughes, Marton, Jones, Roberts, Stoughton, Armour, Bennett, Coffey, Dai, He, Kidd, King, Meyer, Slade, Lum, Stepaniants, Shoemaker, Gachotte, Chakraburtty, Simon, Bard, Friend	2000	Cell	10929718	http://www.ncbi.nlm.nih.gov/pubmed/10929718	Pearson correlation	202410	SUPPLEMENTARY_MATERIAL
	Knijnenburg-Wessels-2009	5.39	Combinatorial effects of environmental parameters on transcriptional regulation in Saccharomyces cerevisiae: a quantitative analysis of a compendium of chemostat-based transcriptome data.	Knijnenburg, Daran, van den Broek, Daran-Lapujade, de Winde, Pronk, Reinders, Wessels	2009	BMC Genomics	19173729	http://www.ncbi.nlm.nih.gov/pubmed/19173729	Pearson correlation	215514	GEO	http://www.ncbi.nlm.nih.gov/projects/geo/query/acc.cgi?acc=GSE11452
	Mitchell-Pilpel-2009	5	Adaptive prediction of environmental changes by microorganisms.	Mitchell, Romano, Groisman, Yona, Dekel, Kupiec, Dahan, Pilpel	2009	Nature	19536156	http://www.ncbi.nlm.nih.gov/pubmed/19536156	Pearson correlation	193100	GEO	http://www.ncbi.nlm.nih.gov/projects/geo/query/acc.cgi?acc=GSE15936	Time Series
	Yvert-Kruglyak-2003	4.88	Trans-acting regulatory variation in Saccharomyces cerevisiae and the role of transcription factors.	Yvert, Brem, Whittle, Akey, Foss, Smith, Mackelprang, Kruglyak	2003	Nat Genet	12897782	http://www.ncbi.nlm.nih.gov/pubmed/12897782	Pearson correlation	205453	SUPPLEMENTARY_MATERIAL		Transcription Factors
	Shalem-Pilpel-2008 A	4.42	Transient transcriptional responses to stress are generated by opposing effects of mRNA production and degradation.	Shalem, Dahan, Levo, Martinez, Furman, Segal, Pilpel	2008	Mol Syst Biol	18854817	http://www.ncbi.nlm.nih.gov/pubmed/18854817	Pearson correlation	185909	GEO	http://www.ncbi.nlm.nih.gov/projects/geo/query/acc.cgi?acc=GSE12220
	Hochwagen-Amon-2005	4.28	Novel response to microtubule perturbation in meiosis.	Hochwagen, Wrobel, Cartron, Demougin, Niederhauser-Wiederkehr, Boselli, Primig, Amon	2005	Mol Cell Biol	15899877	http://www.ncbi.nlm.nih.gov/pubmed/15899877	Pearson correlation	175282	GEO	http://www.ncbi.nlm.nih.gov/projects/geo/query/acc.cgi?acc=GSE1693	Cell Proliferation
	Yona-Dahan-2012	4.25	Chromosomal duplication is a transient evolutionary solution to stress.	Yona, Manor, Herbst, Romano, Mitchell, Kupiec, Pilpel, Dahan	2012	Proc Natl Acad Sci U S A	23197825	http://www.ncbi.nlm.nih.gov/pubmed/23197825	Pearson correlation	192970	GEO	http://www.ncbi.nlm.nih.gov/projects/geo/query/acc.cgi?acc=GSE40817	Cancer
	Shalem-Pilpel-2011	4.22	Transcriptome kinetics is governed by a genome-wide coupling of mRNA production and degradation: a role for RNA Pol II.	Shalem, Groisman, Choder, Dahan, Pilpel	2011	PLoS Genet	21931566	http://www.ncbi.nlm.nih.gov/pubmed/21931566	Pearson correlation	197813	GEO	http://www.ncbi.nlm.nih.gov/projects/geo/query/acc.cgi?acc=GSE26829
	Rintala-Ruohonen-2011	3.77	Transcriptional responses of Saccharomyces cerevisiae to shift from respiratory and respirofermentative to fully fermentative metabolism.	Rintala, Jouhten, Toivari, Wiebe, Maaheimo, Penttilä, Ruohonen	2011	OMICS	21348598	http://www.ncbi.nlm.nih.gov/pubmed/21348598	Pearson correlation	199449	GEO	http://www.ncbi.nlm.nih.gov/projects/geo/query/acc.cgi?acc=GSE22832
	Zhang-Nielsen-2011	2.84	Mapping the interaction of Snf1 with TORC1 in Saccharomyces cerevisiae.	Zhang, Vaga, Chumnanpuen, Kumar, Vemuri, Aebersold, Nielsen	2011	Mol Syst Biol	22068328	http://www.ncbi.nlm.nih.gov/pubmed/22068328	Pearson correlation	198688	GEO	http://www.ncbi.nlm.nih.gov/projects/geo/query/acc.cgi?acc=GSE24421	Transcription Factors
	Orlando-Haase-2008	2.35	Global control of cell-cycle transcription by coupled CDK and network oscillators.	Orlando, Lin, Bernard, Wang, Socolar, Iversen, Hartemink, Haase	2008	Nature	18463633	http://www.ncbi.nlm.nih.gov/pubmed/18463633	Pearson correlation	192045	GEO	http://www.ncbi.nlm.nih.gov/projects/geo/query/acc.cgi?acc=GSE8799	Cell Proliferation,Time Series,Biological Clocks
	Morillo-Huesca-Prado-2010	2.07	The SWR1 histone replacement complex causes genetic instability and genome-wide transcription misregulation in the absence of H2A.Z.	Morillo-Huesca, Clemente-Ruiz, Andújar, Prado	2010	PLoS One	20711347	http://www.ncbi.nlm.nih.gov/pubmed/20711347	Pearson correlation	187066	GEO	http://www.ncbi.nlm.nih.gov/projects/geo/query/acc.cgi?acc=GSE21571
	Aceituno-Agosin-2012	0.88	Oxygen response of the wine yeast Saccharomyces cerevisiae EC1118 grown under carbon-sufficient, nitrogen-limited enological conditions.	Aceituno, Orellana, Torres, Mendoza, Slater, Melo, Agosin	2012	Appl Environ Microbiol	23001663	http://www.ncbi.nlm.nih.gov/pubmed/23001663	Pearson correlation	169845	GEO	http://www.ncbi.nlm.nih.gov/projects/geo/query/acc.cgi?acc=GSE34964
	Brauer-Botstein-2008	0.56	Coordination of growth rate, cell cycle, stress response, and metabolic activity in yeast.	Brauer, Huttenhower, Airoldi, Rosenstein, Matese, Gresham, Boer, Troyanskaya, Botstein	2008	Mol Biol Cell	17959824	http://www.ncbi.nlm.nih.gov/pubmed/17959824	Pearson correlation	184210	GEO	http://www.ncbi.nlm.nih.gov/projects/geo/query/acc.cgi?acc=GSE8825	Cell Proliferation
	Hong-Nielsen-2011	0.52	Unravelling evolutionary strategies of yeast for improving galactose utilization through integrated systems level analysis.	Hong, Vongsangnak, Vemuri, Nielsen	2011	Proc Natl Acad Sci U S A	21715660	http://www.ncbi.nlm.nih.gov/pubmed/21715660	Pearson correlation	157385	GEO	http://www.ncbi.nlm.nih.gov/projects/geo/query/acc.cgi?acc=GSE27185
	Li-Smith-2010	0.43	Thiamine biosynthesis in Saccharomyces cerevisiae is regulated by the NAD+-dependent histone deacetylase Hst1.	Li, Petteys, McClure, Valsakumar, Bekiranov, Frank, Smith	2010	Mol Cell Biol	20439498	http://www.ncbi.nlm.nih.gov/pubmed/20439498	Pearson correlation	171967	GEO	http://www.ncbi.nlm.nih.gov/projects/geo/query/acc.cgi?acc=GSE18488
Genetic interactions		4.28
	Costanzo-Boone-2010-profile-similarity	2.1	The genetic landscape of a cell.	Costanzo, Baryshnikova, Bellay, Kim, Spear, Sevier, Ding, Koh, Toufighi, Mostafavi, Prinz, St Onge, VanderSluis, Makhnevych, Vizeacoumar, Alizadeh, Bahr, Brost, Chen, Cokol, Deshpande, Li, Lin, Liang, Marback, Paw, San Luis, Shuteriqi, Tong, van Dyk, Wallace, Whitney, Weirauch, Zhong, Zhu, Houry, Brudno, Ragibizadeh, Papp, Pál, Roth, Giaever, Nislow, Troyanskaya, Bussey, Bader, Gingras, Morris, K…	2010	Science	20093466	http://www.ncbi.nlm.nih.gov/pubmed/20093466		257575	SUPPLEMENTARY_MATERIAL
	Costanzo-Boone-2010-positive-interactions-full	0.45	The genetic landscape of a cell.	Costanzo, Baryshnikova, Bellay, Kim, Spear, Sevier, Ding, Koh, Toufighi, Mostafavi, Prinz, St Onge, VanderSluis, Makhnevych, Vizeacoumar, Alizadeh, Bahr, Brost, Chen, Cokol, Deshpande, Li, Lin, Liang, Marback, Paw, San Luis, Shuteriqi, Tong, van Dyk, Wallace, Whitney, Weirauch, Zhong, Zhu, Houry, Brudno, Ragibizadeh, Papp, Pál, Roth, Giaever, Nislow, Troyanskaya, Bussey, Bader, Gingras, Morris, K…	2010	Science	20093466	http://www.ncbi.nlm.nih.gov/pubmed/20093466		312829	SUPPLEMENTARY_MATERIAL
	Costanzo-Boone-2010-positive-interactions-intermediate	0.24	The genetic landscape of a cell.	Costanzo, Baryshnikova, Bellay, Kim, Spear, Sevier, Ding, Koh, Toufighi, Mostafavi, Prinz, St Onge, VanderSluis, Makhnevych, Vizeacoumar, Alizadeh, Bahr, Brost, Chen, Cokol, Deshpande, Li, Lin, Liang, Marback, Paw, San Luis, Shuteriqi, Tong, van Dyk, Wallace, Whitney, Weirauch, Zhong, Zhu, Houry, Brudno, Ragibizadeh, Papp, Pál, Roth, Giaever, Nislow, Troyanskaya, Bussey, Bader, Gingras, Morris, K…	2010	Science	20093466	http://www.ncbi.nlm.nih.gov/pubmed/20093466		57182	SUPPLEMENTARY_MATERIAL
	Hoppins-Nunnari-2011 A	0.24	A mitochondrial-focused genetic interaction map reveals a scaffold-like complex required for inner membrane organization in mitochondria.	Hoppins, Collins, Cassidy-Stone, Hummel, Devay, Lackner, Westermann, Schuldiner, Weissman, Nunnari	2011	J Cell Biol	21987634	http://www.ncbi.nlm.nih.gov/pubmed/21987634	Direct interaction	7470	BIOGRID	http://thebiogrid.org/
	Szappanos-Papp-2011 A	0.21	An integrated approach to characterize genetic interaction networks in yeast metabolism.	Szappanos, Kovács, Szamecz, Honti, Costanzo, Baryshnikova, Gelius-Dietrich, Lercher, Jelasity, Myers, Andrews, Boone, Oliver, Pál, Papp	2011	Nat Genet	21623372	http://www.ncbi.nlm.nih.gov/pubmed/21623372	Direct interaction	3297	BIOGRID	http://thebiogrid.org/
	Surma-Ernst-2013 A	0.18	A lipid E-MAP identifies Ubx2 as a critical regulator of lipid saturation and lipid bilayer stress.	Surma, Klose, Peng, Shales, Mrejen, Stefanko, Braberg, Gordon, Vorkel, Ejsing, Farese, Simons, Krogan, Ernst	2013	Mol Cell	23891562	http://www.ncbi.nlm.nih.gov/pubmed/23891562	Direct interaction	5716	BIOGRID	http://thebiogrid.org/	Cultured Cells,Metabolism
	BIOGRID-SMALL-SCALE-STUDIES	0.16							Direct interaction	22661	BIOGRID	http://thebiogrid.org/
	Wilmes-Krogan-2008 A	0.14	A genetic interaction map of RNA-processing factors reveals links between Sem1/Dss1-containing complexes and mRNA export and splicing.	Wilmes, Bergkessel, Bandyopadhyay, Shales, Braberg, Cagney, Collins, Whitworth, Kress, Weissman, Ideker, Guthrie, Krogan	2008	Mol Cell	19061648	http://www.ncbi.nlm.nih.gov/pubmed/19061648	Direct interaction	3803	BIOGRID	http://thebiogrid.org/
	Wilmes-Krogan-2008 B	0.14	A genetic interaction map of RNA-processing factors reveals links between Sem1/Dss1-containing complexes and mRNA export and splicing.	Wilmes, Bergkessel, Bandyopadhyay, Shales, Braberg, Cagney, Collins, Whitworth, Kress, Weissman, Ideker, Guthrie, Krogan	2008	Mol Cell	19061648	http://www.ncbi.nlm.nih.gov/pubmed/19061648	Direct interaction	2655	BIOGRID	http://thebiogrid.org/
	Davierwala-Hughes-2005 A	0.1	The synthetic genetic interaction spectrum of essential genes.	Davierwala, Haynes, Li, Brost, Robinson, Yu, Mnaimneh, Ding, Zhu, Chen, Cheng, Brown, Boone, Andrews, Hughes	2005	Nat Genet	16155567	http://www.ncbi.nlm.nih.gov/pubmed/16155567	Direct interaction	289	BIOGRID	http://thebiogrid.org/
	Pan-Boeke-2006 A	0.1	A DNA integrity network in the yeast Saccharomyces cerevisiae.	Pan, Ye, Yuan, Wang, Bader, Boeke	2006	Cell	16487579	http://www.ncbi.nlm.nih.gov/pubmed/16487579	Direct interaction	3662	BIOGRID	http://thebiogrid.org/	Signal Transduction
	Szappanos-Papp-2011 B	0.06	An integrated approach to characterize genetic interaction networks in yeast metabolism.	Szappanos, Kovács, Szamecz, Honti, Costanzo, Baryshnikova, Gelius-Dietrich, Lercher, Jelasity, Myers, Andrews, Boone, Oliver, Pál, Papp	2011	Nat Genet	21623372	http://www.ncbi.nlm.nih.gov/pubmed/21623372	Direct interaction	1954	BIOGRID	http://thebiogrid.org/
	Costanzo-Boone-2010 B	0.06	The genetic landscape of a cell.	Costanzo, Baryshnikova, Bellay, Kim, Spear, Sevier, Ding, Koh, Toufighi, Mostafavi, Prinz, St Onge, VanderSluis, Makhnevych, Vizeacoumar, Alizadeh, Bahr, Brost, Chen, Cokol, Deshpande, Li, Lin, Liang, Marback, Paw, San Luis, Shuteriqi, Tong, van Dyk, Wallace, Whitney, Weirauch, Zhong, Zhu, Houry, Brudno, Ragibizadeh, Papp, Pál, Roth, Giaever, Nislow, Troyanskaya, Bussey, Bader, Gingras, Morris, K…	2010	Science	20093466	http://www.ncbi.nlm.nih.gov/pubmed/20093466	Direct interaction	5646	BIOGRID	http://thebiogrid.org/
	Davierwala-Hughes-2005 B	0.05	The synthetic genetic interaction spectrum of essential genes.	Davierwala, Haynes, Li, Brost, Robinson, Yu, Mnaimneh, Ding, Zhu, Chen, Cheng, Brown, Boone, Andrews, Hughes	2005	Nat Genet	16155567	http://www.ncbi.nlm.nih.gov/pubmed/16155567	Direct interaction	278	BIOGRID	http://thebiogrid.org/
	Surma-Ernst-2013 B	0.01	A lipid E-MAP identifies Ubx2 as a critical regulator of lipid saturation and lipid bilayer stress.	Surma, Klose, Peng, Shales, Mrejen, Stefanko, Braberg, Gordon, Vorkel, Ejsing, Farese, Simons, Krogan, Ernst	2013	Mol Cell	23891562	http://www.ncbi.nlm.nih.gov/pubmed/23891562	Direct interaction	810	BIOGRID	http://thebiogrid.org/	Cultured Cells,Metabolism
	Pan-Boeke-2006 B	0.01	A DNA integrity network in the yeast Saccharomyces cerevisiae.	Pan, Ye, Yuan, Wang, Bader, Boeke	2006	Cell	16487579	http://www.ncbi.nlm.nih.gov/pubmed/16487579	Direct interaction	962	BIOGRID	http://thebiogrid.org/	Signal Transduction
	Costanzo-Boone-2010 A	0.01	The genetic landscape of a cell.	Costanzo, Baryshnikova, Bellay, Kim, Spear, Sevier, Ding, Koh, Toufighi, Mostafavi, Prinz, St Onge, VanderSluis, Makhnevych, Vizeacoumar, Alizadeh, Bahr, Brost, Chen, Cokol, Deshpande, Li, Lin, Liang, Marback, Paw, San Luis, Shuteriqi, Tong, van Dyk, Wallace, Whitney, Weirauch, Zhong, Zhu, Houry, Brudno, Ragibizadeh, Papp, Pál, Roth, Giaever, Nislow, Troyanskaya, Bussey, Bader, Gingras, Morris, K…	2010	Science	20093466	http://www.ncbi.nlm.nih.gov/pubmed/20093466	Direct interaction	52122	BIOGRID	http://thebiogrid.org/
	Fiedler-Krogan-2009 A	0.01	Functional organization of the S. cerevisiae phosphorylation network.	Fiedler, Braberg, Mehta, Chechik, Cagney, Mukherjee, Silva, Shales, Collins, van Wageningen, Kemmeren, Holstege, Weissman, Keogh, Koller, Shokat, Krogan	2009	Cell	19269370	http://www.ncbi.nlm.nih.gov/pubmed/19269370	Direct interaction	2642	BIOGRID	http://thebiogrid.org/	Signal Transduction
Other		4.18
	Hillenmeyer-Giaever-2008 A	2.44	The chemical genomic portrait of yeast: uncovering a phenotype for all genes.	Hillenmeyer, Fung, Wildenhain, Pierce, Hoon, Lee, Proctor, St Onge, Tyers, Koller, Altman, Davis, Nislow, Giaever	2008	Science	18420932	http://www.ncbi.nlm.nih.gov/pubmed/18420932	Pearson correlation	201531	COLLABORATOR		Signal Transduction
	Hillenmeyer-Giaever-2008 B	1.74	The chemical genomic portrait of yeast: uncovering a phenotype for all genes.	Hillenmeyer, Fung, Wildenhain, Pierce, Hoon, Lee, Proctor, St Onge, Tyers, Koller, Altman, Davis, Nislow, Giaever	2008	Science	18420932	http://www.ncbi.nlm.nih.gov/pubmed/18420932	Pearson correlation	148490	COLLABORATOR		Signal Transduction
Physical interactions		3.96
	Babiano-de la Cruz-2013	0.98	Yeast ribosomal protein L7 and its homologue Rlp7 are simultaneously present at distinct sites on pre-60S ribosomal particles.	Babiano, Badis, Saveanu, Namane, Doyen, Díaz-Quintana, Jacquier, Fromont-Racine, de la Cruz	2013	Nucleic Acids Res	23945946	http://www.ncbi.nlm.nih.gov/pubmed/23945946	Direct interaction	263	IREF	http://irefindex.uio.no/wiki/iRefIndex
	Lee-Marcotte-2007 Protein complexes	0.72	An improved, bias-reduced probabilistic functional gene network of baker's yeast, Saccharomyces cerevisiae.	Lee, Li, Marcotte	2007	PLoS One	17912365	http://www.ncbi.nlm.nih.gov/pubmed/17912365		31902	SUPPLEMENTARY_MATERIAL
	Gong-Houry-2009	0.57	An atlas of chaperone-protein interactions in Saccharomyces cerevisiae: implications to protein folding pathways in the cell.	Gong, Kakihara, Krogan, Greenblatt, Emili, Zhang, Houry	2009	Mol Syst Biol	19536198	http://www.ncbi.nlm.nih.gov/pubmed/19536198	Direct interaction	21190	IREF	http://irefindex.uio.no/wiki/iRefIndex	Signal Transduction
	Babu-Greenblatt-2012 C	0.41	Interaction landscape of membrane-protein complexes in Saccharomyces cerevisiae.	Babu, Vlasblom, Pu, Guo, Graham, Bean, Burston, Vizeacoumar, Snider, Phanse, Fong, Tam, Davey, Hnatshak, Bajaj, Chandran, Punna, Christopolous, Wong, Yu, Zhong, Li, Stagljar, Conibear, Wodak, Emili, Greenblatt	2012	Nature	22940862	http://www.ncbi.nlm.nih.gov/pubmed/22940862		11617	None
	Allen-Rexach-2001	0.36	Proteomic analysis of nucleoporin interacting proteins.	Allen, Huang, Burlingame, Rexach	2001	J Biol Chem	11387327	http://www.ncbi.nlm.nih.gov/pubmed/11387327	Direct interaction	113	IREF	http://irefindex.uio.no/wiki/iRefIndex
	Collins-Krogan-2007	0.32	Toward a comprehensive atlas of the physical interactome of Saccharomyces cerevisiae.	Collins, Kemmeren, Zhao, Greenblatt, Spencer, Holstege, Weissman, Krogan	2007	Mol Cell Proteomics	17200106	http://www.ncbi.nlm.nih.gov/pubmed/17200106	Direct interaction	9064	BIOGRID	http://thebiogrid.org/
	IREF-BIOGRID	0.26							Direct interaction	68580	IREF	http://irefindex.uio.no/wiki/iRefIndex
	Zhao-Houry-2005	0.19	Navigating the chaperone network: an integrative map of physical and genetic interactions mediated by the hsp90 chaperone.	Zhao, Davey, Hsu, Kaplanek, Tong, Parsons, Krogan, Cagney, Mai, Greenblatt, Boone, Emili, Houry	2005	Cell	15766533	http://www.ncbi.nlm.nih.gov/pubmed/15766533	Direct interaction	552	IREF	http://irefindex.uio.no/wiki/iRefIndex	Transcription Factors
	Ito-Sakaki-2000	0.09	Toward a protein-protein interaction map of the budding yeast: A comprehensive system to examine two-hybrid interactions in all possible combinations between the yeast proteins.	Ito, Tashiro, Muta, Ozawa, Chiba, Nishizawa, Yamamoto, Kuhara, Sakaki	2000	Proc Natl Acad Sci U S A	10655498	http://www.ncbi.nlm.nih.gov/pubmed/10655498	Direct interaction	110	IREF	http://irefindex.uio.no/wiki/iRefIndex
	Gavin-Superti-Furga-2006	0.07	Proteome survey reveals modularity of the yeast cell machinery.	Gavin, Aloy, Grandi, Krause, Boesche, Marzioch, Rau, Jensen, Bastuck, Dümpelfeld, Edelmann, Heurtier, Hoffman, Hoefert, Klein, Hudak, Michon, Schelder, Schirle, Remor, Rudi, Hooper, Bauer, Bouwmeester, Casari, Drewes, Neubauer, Rick, Kuster, Bork, Russell, Superti-Furga	2006	Nature	16429126	http://www.ncbi.nlm.nih.gov/pubmed/16429126	Direct interaction	6531	BIOGRID	http://thebiogrid.org/
Co-localization		3.93
	Huh-O'Shea-2003	3.93	Global analysis of protein localization in budding yeast.	Huh, Falvo, Gerke, Carroll, Howson, Weissman, O'Shea	2003	Nature	14562095	http://www.ncbi.nlm.nih.gov/pubmed/14562095		904057	SUPPLEMENTARY_MATERIAL
Predicted		2.71
	Stuart-Kim-2003	1.89	A gene-coexpression network for global discovery of conserved genetic modules.	Stuart, Segal, Koller, Kim	2003	Science	12934013	http://www.ncbi.nlm.nih.gov/pubmed/12934013		16787	SUPPLEMENTARY_MATERIAL		Cell Proliferation,Cultured Cells,Signal Transduction,Cancer
	Lee-Marcotte-2007 Gene neighbourhoods	0.73	An improved, bias-reduced probabilistic functional gene network of baker's yeast, Saccharomyces cerevisiae.	Lee, Li, Marcotte	2007	PLoS One	17912365	http://www.ncbi.nlm.nih.gov/pubmed/17912365		4961	SUPPLEMENTARY_MATERIAL
	I2D-MINT-Worm2Yeast	0.03	MINT: a Molecular INTeraction database.	Zanzoni, Montecchi-Palazzi, Quondam, Ausiello, Helmer-Citterich, Cesareni	2002	FEBS Lett	11911893	http://www.ncbi.nlm.nih.gov/pubmed/11911893	Direct interaction	218	I2D	http://ophid.utoronto.ca/
	I2D-BioGRID-Human2Yeast	0.03	BioGRID: a general repository for interaction datasets.	Stark, Breitkreutz, Reguly, Boucher, Breitkreutz, Tyers	2006	Nucleic Acids Res	16381927	http://www.ncbi.nlm.nih.gov/pubmed/16381927	Direct interaction	1488	I2D	http://ophid.utoronto.ca/
	I2D-Rual-Vidal-2004-core-Human2Yeast	0.02	Towards a proteome-scale map of the human protein-protein interaction network.	Rual, Venkatesan, Hao, Hirozane-Kishikawa, Dricot, Li, Berriz, Gibbons, Dreze, Ayivi-Guedehoussou, Klitgord, Simon, Boxem, Milstein, Rosenberg, Goldberg, Zhang, Wong, Franklin, Li, Albala, Lim, Fraughton, Llamosas, Cevik, Bex, Lamesch, Sikorski, Vandenhaute, Zoghbi, Smolyar, Bosak, Sequerra, Doucette-Stamm, Cusick, Hill, Roth, Vidal	2005	Nature	16189514	http://www.ncbi.nlm.nih.gov/pubmed/16189514	Direct interaction	50	I2D	http://ophid.utoronto.ca/
	I2D-Giot-Rothbert-2003-Low-Fly2Yeast	0.01	A protein interaction map of Drosophila melanogaster.	Giot, Bader, Brouwer, Chaudhuri, Kuang, Li, Hao, Ooi, Godwin, Vitols, Vijayadamodar, Pochart, Machineni, Welsh, Kong, Zerhusen, Malcolm, Varrone, Collis, Minto, Burgess, McDaniel, Stimpson, Spriggs, Williams, Neurath, Ioime, Agee, Voss, Furtak, Renzulli, Aanensen, Carrolla, Bickelhaupt, Lazovatsky, DaSilva, Zhong, Stanyon, Finley, White, Braverman, Jarvie, Gold, Leach, Knight, Shimkets, McKenna, …	2003	Science	14605208	http://www.ncbi.nlm.nih.gov/pubmed/14605208	Direct interaction	221	I2D	http://ophid.utoronto.ca/	Cell Proliferation,Signal Transduction,Nervous System,Immune System
Shared protein domains		0.4
	PFAM	0.24							Pearson correlation	31272	PFAM	http://pfam.sanger.ac.uk/
	INTERPRO	0.16							Pearson correlation	46815	INTERPRO	http://www.ebi.ac.uk/interpro/
Gene 1	Gene 2	Weight	Type	Source
RPL13A	RPL13B	0.00980714	Co-expression	Aceituno-Agosin-2012
RPL13A	RPL15A	0.00946041	Co-expression	Aceituno-Agosin-2012
RPL13A	RPS0B	0.0108941	Co-expression	Aceituno-Agosin-2012
RPL13A	RPS28A	0.00886164	Co-expression	Aceituno-Agosin-2012
RPL13A	YBL092W	0.0101179	Co-expression	Aceituno-Agosin-2012
RPL13A	YBR189W	0.0102731	Co-expression	Aceituno-Agosin-2012
RPL13A	YBR191W	0.0124591	Co-expression	Aceituno-Agosin-2012
RPL13A	YDL075W	0.00978209	Co-expression	Aceituno-Agosin-2012
RPL13A	YDR471W	0.00975795	Co-expression	Aceituno-Agosin-2012
RPL13A	YFL034C-A	0.0098306	Co-expression	Aceituno-Agosin-2012
RPL13A	YGL147C	0.00997313	Co-expression	Aceituno-Agosin-2012
RPL13A	YGR027C	0.00888329	Co-expression	Aceituno-Agosin-2012
RPL13A	YGR034W	0.0110985	Co-expression	Aceituno-Agosin-2012
RPL13A	YGR085C	0.0119902	Co-expression	Aceituno-Agosin-2012
RPL13A	YHL001W	0.0114706	Co-expression	Aceituno-Agosin-2012
RPL13A	YHR010W	0.00902973	Co-expression	Aceituno-Agosin-2012
RPL13A	YHR128W	0.0100355	Co-expression	Aceituno-Agosin-2012
RPL13A	YIL052C	0.0106692	Co-expression	Aceituno-Agosin-2012
RPL13A	YJL190C	0.00997917	Co-expression	Aceituno-Agosin-2012
RPL13A	YKL006W	0.0106194	Co-expression	Aceituno-Agosin-2012
RPL13A	YLR061W	0.0106834	Co-expression	Aceituno-Agosin-2012
RPL13A	YLR344W	0.00935994	Co-expression	Aceituno-Agosin-2012
RPL13A	YLR441C	0.00863341	Co-expression	Aceituno-Agosin-2012
RPL13A	YML063W	0.00829594	Co-expression	Aceituno-Agosin-2012
RPL13A	YML073C	0.0106759	Co-expression	Aceituno-Agosin-2012
RPL13A	YMR230W	0.0112998	Co-expression	Aceituno-Agosin-2012
RPL13A	YNL069C	0.0126059	Co-expression	Aceituno-Agosin-2012
RPL13A	YNL096C	0.0112642	Co-expression	Aceituno-Agosin-2012
RPL13A	YNL302C	0.01182	Co-expression	Aceituno-Agosin-2012
RPL13A	YOL121C	0.0101445	Co-expression	Aceituno-Agosin-2012
RPL13A	YOL127W	0.00833266	Co-expression	Aceituno-Agosin-2012
RPL13A	YOR234C	0.009467	Co-expression	Aceituno-Agosin-2012
RPL13A	YOR293W	0.010684	Co-expression	Aceituno-Agosin-2012
RPL13A	YPL079W	0.0100038	Co-expression	Aceituno-Agosin-2012
RPL13A	YPR041W	0.0114086	Co-expression	Aceituno-Agosin-2012
RPL13A	YPR102C	0.0100304	Co-expression	Aceituno-Agosin-2012
RPL13B	YBL092W	0.0120766	Co-expression	Aceituno-Agosin-2012
RPL13B	YBR189W	0.0162309	Co-expression	Aceituno-Agosin-2012
RPL13B	YBR191W	0.0169703	Co-expression	Aceituno-Agosin-2012
RPL13B	YDL075W	0.0132859	Co-expression	Aceituno-Agosin-2012
RPL13B	YDR064W	0.011872	Co-expression	Aceituno-Agosin-2012
RPL13B	YDR382W	0.0145352	Co-expression	Aceituno-Agosin-2012
RPL13B	YDR471W	0.0129246	Co-expression	Aceituno-Agosin-2012
RPL13B	YER056C-A	0.0132212	Co-expression	Aceituno-Agosin-2012
RPL13B	YGL031C	0.0172152	Co-expression	Aceituno-Agosin-2012
RPL13B	YGL076C	0.0131455	Co-expression	Aceituno-Agosin-2012
RPL13B	YGR148C	0.015373	Co-expression	Aceituno-Agosin-2012
RPL13B	YHL001W	0.017382	Co-expression	Aceituno-Agosin-2012
RPL13B	YHL015W	0.0131904	Co-expression	Aceituno-Agosin-2012
RPL13B	YIL052C	0.0132804	Co-expression	Aceituno-Agosin-2012
RPL13B	YJL177W	0.0138026	Co-expression	Aceituno-Agosin-2012
RPL13B	YLR061W	0.0160145	Co-expression	Aceituno-Agosin-2012
RPL13B	YLR075W	0.0121588	Co-expression	Aceituno-Agosin-2012
RPL13B	YLR367W	0.0132047	Co-expression	Aceituno-Agosin-2012
RPL13B	YLR406C	0.0145569	Co-expression	Aceituno-Agosin-2012
RPL13B	YLR441C	0.0105535	Co-expression	Aceituno-Agosin-2012
RPL13B	YML063W	0.00966407	Co-expression	Aceituno-Agosin-2012
RPL13B	YML073C	0.0144299	Co-expression	Aceituno-Agosin-2012
RPL13B	YNL069C	0.0163488	Co-expression	Aceituno-Agosin-2012
RPL13B	YOL121C	0.0133036	Co-expression	Aceituno-Agosin-2012
RPL13B	YOR096W	0.011557	Co-expression	Aceituno-Agosin-2012
RPL13B	YPL079W	0.0146427	Co-expression	Aceituno-Agosin-2012
RPL15A	RPP1A	0.0146117	Co-expression	Aceituno-Agosin-2012
RPL15A	RPS28A	0.0109266	Co-expression	Aceituno-Agosin-2012
RPL15A	RPS31	0.0132547	Co-expression	Aceituno-Agosin-2012
RPL15A	YBL092W	0.0112838	Co-expression	Aceituno-Agosin-2012
RPL15A	YBR191W	0.0129923	Co-expression	Aceituno-Agosin-2012
RPL15A	YDR471W	0.0106231	Co-expression	Aceituno-Agosin-2012
RPL15A	YGL103W	0.0152782	Co-expression	Aceituno-Agosin-2012
RPL15A	YGL123W	0.012911	Co-expression	Aceituno-Agosin-2012
RPL15A	YGL147C	0.0129637	Co-expression	Aceituno-Agosin-2012
RPL15A	YGR027C	0.0106709	Co-expression	Aceituno-Agosin-2012
RPL15A	YGR034W	0.012412	Co-expression	Aceituno-Agosin-2012
RPL15A	YGR085C	0.0138046	Co-expression	Aceituno-Agosin-2012
RPL15A	YHL001W	0.013258	Co-expression	Aceituno-Agosin-2012
RPL15A	YHL015W	0.0115469	Co-expression	Aceituno-Agosin-2012
RPL15A	YHR010W	0.0111603	Co-expression	Aceituno-Agosin-2012
RPL15A	YJL190C	0.0131408	Co-expression	Aceituno-Agosin-2012
RPL15A	YKL006W	0.0135874	Co-expression	Aceituno-Agosin-2012
RPL15A	YLR075W	0.0114	Co-expression	Aceituno-Agosin-2012
RPL15A	YLR325C	0.0135415	Co-expression	Aceituno-Agosin-2012
RPL15A	YLR344W	0.0103317	Co-expression	Aceituno-Agosin-2012
RPL15A	YLR441C	0.0107096	Co-expression	Aceituno-Agosin-2012
RPL15A	YML063W	0.00917249	Co-expression	Aceituno-Agosin-2012
RPL15A	YMR230W	0.0139338	Co-expression	Aceituno-Agosin-2012
RPL15A	YNL302C	0.014536	Co-expression	Aceituno-Agosin-2012
RPL15A	YOL121C	0.0128804	Co-expression	Aceituno-Agosin-2012
RPL15A	YOL127W	0.0107902	Co-expression	Aceituno-Agosin-2012
RPL15A	YOR234C	0.0107933	Co-expression	Aceituno-Agosin-2012
RPL15A	YOR293W	0.013238	Co-expression	Aceituno-Agosin-2012
RPL15A	YOR369C	0.0147031	Co-expression	Aceituno-Agosin-2012
RPL15A	YPL079W	0.0114043	Co-expression	Aceituno-Agosin-2012
RPL15A	YPL143W	0.0108903	Co-expression	Aceituno-Agosin-2012
RPL15A	YPR102C	0.0120748	Co-expression	Aceituno-Agosin-2012
RPL36A	RPL13A	0.0112926	Co-expression	Aceituno-Agosin-2012
RPL36A	RPL13B	0.0157569	Co-expression	Aceituno-Agosin-2012
RPL36A	RPL15A	0.0121587	Co-expression	Aceituno-Agosin-2012
RPL36A	RPL37B	0.0189426	Co-expression	Aceituno-Agosin-2012
RPL36A	RPL39	0.0153231	Co-expression	Aceituno-Agosin-2012
RPL36A	RPS14A	0.0161871	Co-expression	Aceituno-Agosin-2012
RPL36A	RPS26A	0.0163593	Co-expression	Aceituno-Agosin-2012
RPL36A	RPS26B	0.0183375	Co-expression	Aceituno-Agosin-2012
RPL36A	RPS28A	0.0110453	Co-expression	Aceituno-Agosin-2012
RPL36A	RPS29B	0.0161503	Co-expression	Aceituno-Agosin-2012
RPL36A	YBL092W	0.0149561	Co-expression	Aceituno-Agosin-2012
RPL36A	YBR189W	0.0166613	Co-expression	Aceituno-Agosin-2012
RPL36A	YBR191W	0.0184679	Co-expression	Aceituno-Agosin-2012
RPL36A	YDL075W	0.0161265	Co-expression	Aceituno-Agosin-2012
RPL36A	YDR471W	0.0145127	Co-expression	Aceituno-Agosin-2012
RPL36A	YFL034C-A	0.0129387	Co-expression	Aceituno-Agosin-2012
RPL36A	YGL031C	0.0180859	Co-expression	Aceituno-Agosin-2012
RPL36A	YGL147C	0.0143932	Co-expression	Aceituno-Agosin-2012
RPL36A	YGR148C	0.0147972	Co-expression	Aceituno-Agosin-2012
RPL36A	YHL001W	0.0188858	Co-expression	Aceituno-Agosin-2012
RPL36A	YHL015W	0.0142035	Co-expression	Aceituno-Agosin-2012
RPL36A	YHR010W	0.0116314	Co-expression	Aceituno-Agosin-2012
RPL36A	YIL052C	0.0157216	Co-expression	Aceituno-Agosin-2012
RPL36A	YJL177W	0.0162881	Co-expression	Aceituno-Agosin-2012
RPL36A	YKL006W	0.0141571	Co-expression	Aceituno-Agosin-2012
RPL36A	YLR061W	0.0158876	Co-expression	Aceituno-Agosin-2012
RPL36A	YLR344W	0.0125291	Co-expression	Aceituno-Agosin-2012
RPL36A	YLR406C	0.0157851	Co-expression	Aceituno-Agosin-2012
RPL36A	YLR441C	0.0119507	Co-expression	Aceituno-Agosin-2012
RPL36A	YML063W	0.0104991	Co-expression	Aceituno-Agosin-2012
RPL36A	YML073C	0.0142979	Co-expression	Aceituno-Agosin-2012
RPL36A	YNL069C	0.0169529	Co-expression	Aceituno-Agosin-2012
RPL36A	YOL121C	0.0151626	Co-expression	Aceituno-Agosin-2012
RPL36A	YOR234C	0.011409	Co-expression	Aceituno-Agosin-2012
RPL36A	YPL079W	0.0151919	Co-expression	Aceituno-Agosin-2012
RPL37A	RPL13B	0.0131685	Co-expression	Aceituno-Agosin-2012
RPL37A	RPS26B	0.014191	Co-expression	Aceituno-Agosin-2012
RPL37A	YBR189W	0.0145153	Co-expression	Aceituno-Agosin-2012
RPL37A	YDR064W	0.0129441	Co-expression	Aceituno-Agosin-2012
RPL37A	YER056C-A	0.0140037	Co-expression	Aceituno-Agosin-2012
RPL37A	YGL076C	0.0125063	Co-expression	Aceituno-Agosin-2012
RPL37A	YGR148C	0.0141472	Co-expression	Aceituno-Agosin-2012
RPL37A	YHL015W	0.0137022	Co-expression	Aceituno-Agosin-2012
RPL37A	YJR123W	0.0142042	Co-expression	Aceituno-Agosin-2012
RPL37A	YLR061W	0.0140256	Co-expression	Aceituno-Agosin-2012
RPL37A	YLR333C	0.0149455	Co-expression	Aceituno-Agosin-2012
RPL37A	YLR367W	0.0140798	Co-expression	Aceituno-Agosin-2012
RPL37A	YLR388W	0.0144917	Co-expression	Aceituno-Agosin-2012
RPL37A	YLR406C	0.0134458	Co-expression	Aceituno-Agosin-2012
RPL37A	YML073C	0.0125703	Co-expression	Aceituno-Agosin-2012
RPL37A	YNL067W	0.0151215	Co-expression	Aceituno-Agosin-2012
RPL37A	YOR096W	0.0125005	Co-expression	Aceituno-Agosin-2012
RPL37A	YPL037C	0.0122187	Co-expression	Aceituno-Agosin-2012
RPL37A	YPL079W	0.0128566	Co-expression	Aceituno-Agosin-2012
RPL37B	RPL13B	0.0145024	Co-expression	Aceituno-Agosin-2012
RPL37B	RPL37A	0.014161	Co-expression	Aceituno-Agosin-2012
RPL37B	RPS14A	0.0150961	Co-expression	Aceituno-Agosin-2012
RPL37B	RPS26B	0.0187012	Co-expression	Aceituno-Agosin-2012
RPL37B	YBL092W	0.0136179	Co-expression	Aceituno-Agosin-2012
RPL37B	YBR189W	0.0168016	Co-expression	Aceituno-Agosin-2012
RPL37B	YBR191W	0.0172391	Co-expression	Aceituno-Agosin-2012
RPL37B	YDL075W	0.0165574	Co-expression	Aceituno-Agosin-2012
RPL37B	YDR064W	0.0129948	Co-expression	Aceituno-Agosin-2012
RPL37B	YDR471W	0.0145276	Co-expression	Aceituno-Agosin-2012
RPL37B	YER056C-A	0.0135997	Co-expression	Aceituno-Agosin-2012
RPL37B	YFL034C-A	0.0142056	Co-expression	Aceituno-Agosin-2012
RPL37B	YGL031C	0.0173274	Co-expression	Aceituno-Agosin-2012
RPL37B	YGL147C	0.0150001	Co-expression	Aceituno-Agosin-2012
RPL37B	YGR148C	0.0150232	Co-expression	Aceituno-Agosin-2012
RPL37B	YHL001W	0.0179501	Co-expression	Aceituno-Agosin-2012
RPL37B	YHL015W	0.0151082	Co-expression	Aceituno-Agosin-2012
RPL37B	YIL052C	0.0148754	Co-expression	Aceituno-Agosin-2012
RPL37B	YJL136C	0.0180922	Co-expression	Aceituno-Agosin-2012
RPL37B	YJL177W	0.016117	Co-expression	Aceituno-Agosin-2012
RPL37B	YKR057W	0.0169018	Co-expression	Aceituno-Agosin-2012
RPL37B	YLR333C	0.017895	Co-expression	Aceituno-Agosin-2012
RPL37B	YLR344W	0.0124739	Co-expression	Aceituno-Agosin-2012
RPL37B	YLR406C	0.0183216	Co-expression	Aceituno-Agosin-2012
RPL37B	YLR441C	0.0121061	Co-expression	Aceituno-Agosin-2012
RPL37B	YML063W	0.0103617	Co-expression	Aceituno-Agosin-2012
RPL37B	YOL121C	0.0166101	Co-expression	Aceituno-Agosin-2012
RPL37B	YOR096W	0.0137742	Co-expression	Aceituno-Agosin-2012
RPL37B	YPL079W	0.0150705	Co-expression	Aceituno-Agosin-2012
RPL39	RPL15A	0.0137959	Co-expression	Aceituno-Agosin-2012
RPL39	RPL37B	0.016404	Co-expression	Aceituno-Agosin-2012
RPL39	RPP1A	0.0153866	Co-expression	Aceituno-Agosin-2012
RPL39	RPS27B	0.0165079	Co-expression	Aceituno-Agosin-2012
RPL39	RPS28A	0.0128349	Co-expression	Aceituno-Agosin-2012
RPL39	RPS31	0.0173677	Co-expression	Aceituno-Agosin-2012
RPL39	YBL092W	0.0136837	Co-expression	Aceituno-Agosin-2012
RPL39	YDL075W	0.0133135	Co-expression	Aceituno-Agosin-2012
RPL39	YDR447C	0.0159678	Co-expression	Aceituno-Agosin-2012
RPL39	YGL103W	0.0165295	Co-expression	Aceituno-Agosin-2012
RPL39	YGL147C	0.0160201	Co-expression	Aceituno-Agosin-2012
RPL39	YGR034W	0.015871	Co-expression	Aceituno-Agosin-2012
RPL39	YGR085C	0.0177937	Co-expression	Aceituno-Agosin-2012
RPL39	YHR010W	0.0139207	Co-expression	Aceituno-Agosin-2012
RPL39	YJL190C	0.015947	Co-expression	Aceituno-Agosin-2012
RPL39	YKL006W	0.0154525	Co-expression	Aceituno-Agosin-2012
RPL39	YLR325C	0.0187017	Co-expression	Aceituno-Agosin-2012
RPL39	YLR344W	0.0130631	Co-expression	Aceituno-Agosin-2012
RPL39	YLR441C	0.0121823	Co-expression	Aceituno-Agosin-2012
RPL39	YML063W	0.010311	Co-expression	Aceituno-Agosin-2012
RPL39	YMR230W	0.0182128	Co-expression	Aceituno-Agosin-2012
RPL39	YNL302C	0.0169367	Co-expression	Aceituno-Agosin-2012
RPL39	YOL121C	0.0148701	Co-expression	Aceituno-Agosin-2012
RPL39	YOL127W	0.011945	Co-expression	Aceituno-Agosin-2012
RPL39	YOR234C	0.0131989	Co-expression	Aceituno-Agosin-2012
RPL39	YOR293W	0.0168703	Co-expression	Aceituno-Agosin-2012
RPL39	YOR369C	0.0177567	Co-expression	Aceituno-Agosin-2012
RPL39	YPL143W	0.012236	Co-expression	Aceituno-Agosin-2012
RPL39	YPR102C	0.015548	Co-expression	Aceituno-Agosin-2012
RPL5	RPS0A	0.0134729	Co-expression	Aceituno-Agosin-2012
RPL5	RPS0B	0.0152202	Co-expression	Aceituno-Agosin-2012
RPL5	YAR015W	0.0144885	Co-expression	Aceituno-Agosin-2012
RPL5	YBR031W	0.0130968	Co-expression	Aceituno-Agosin-2012
RPL5	YIL133C	0.0154721	Co-expression	Aceituno-Agosin-2012
RPL5	YMR120C	0.0164799	Co-expression	Aceituno-Agosin-2012
RPL5	YPL160W	0.0172706	Co-expression	Aceituno-Agosin-2012
RPP0	RPS0A	0.0108186	Co-expression	Aceituno-Agosin-2012
RPP0	YBR031W	0.0107317	Co-expression	Aceituno-Agosin-2012
RPP0	YDL229W	0.00997334	Co-expression	Aceituno-Agosin-2012
RPP0	YIL053W	0.01092	Co-expression	Aceituno-Agosin-2012
RPP0	YKL152C	0.0111251	Co-expression	Aceituno-Agosin-2012
RPP0	YMR108W	0.00976614	Co-expression	Aceituno-Agosin-2012
RPP0	YNL209W	0.0108743	Co-expression	Aceituno-Agosin-2012
RPP0	YOL086C	0.0120961	Co-expression	Aceituno-Agosin-2012
RPP1A	YGL030W	0.0160813	Co-expression	Aceituno-Agosin-2012
RPP1A	YGL103W	0.0186265	Co-expression	Aceituno-Agosin-2012
RPP1A	YGL123W	0.0162477	Co-expression	Aceituno-Agosin-2012
RPP1A	YGR027C	0.0123896	Co-expression	Aceituno-Agosin-2012
RPP1A	YGR034W	0.0133441	Co-expression	Aceituno-Agosin-2012
RPP1A	YHR010W	0.011264	Co-expression	Aceituno-Agosin-2012
RPP1A	YJL190C	0.0144791	Co-expression	Aceituno-Agosin-2012
RPP1A	YKL006W	0.0160003	Co-expression	Aceituno-Agosin-2012
RPP1A	YLR075W	0.0126928	Co-expression	Aceituno-Agosin-2012
RPP1A	YLR344W	0.0112769	Co-expression	Aceituno-Agosin-2012
RPP1A	YLR441C	0.0116074	Co-expression	Aceituno-Agosin-2012
RPP1A	YMR230W	0.0158291	Co-expression	Aceituno-Agosin-2012
RPP1A	YNL302C	0.0158404	Co-expression	Aceituno-Agosin-2012
RPP1A	YOL121C	0.0155502	Co-expression	Aceituno-Agosin-2012
RPP1A	YOL127W	0.0107945	Co-expression	Aceituno-Agosin-2012
RPP1A	YOR293W	0.0148355	Co-expression	Aceituno-Agosin-2012
RPP1A	YOR369C	0.0159406	Co-expression	Aceituno-Agosin-2012
RPP1A	YPL143W	0.0128564	Co-expression	Aceituno-Agosin-2012
RPP1A	YPR041W	0.0161788	Co-expression	Aceituno-Agosin-2012
RPS0A	YAR015W	0.0141682	Co-expression	Aceituno-Agosin-2012
RPS0A	YBR031W	0.0117707	Co-expression	Aceituno-Agosin-2012
RPS0A	YHL033C	0.015331	Co-expression	Aceituno-Agosin-2012
RPS0A	YHR193C	0.0127835	Co-expression	Aceituno-Agosin-2012
RPS0A	YIL053W	0.0118049	Co-expression	Aceituno-Agosin-2012
RPS0A	YIL133C	0.0129697	Co-expression	Aceituno-Agosin-2012
RPS0A	YKL180W	0.0134629	Co-expression	Aceituno-Agosin-2012
RPS0A	YML056C	0.0113245	Co-expression	Aceituno-Agosin-2012
RPS0A	YPR052C	0.0135051	Co-expression	Aceituno-Agosin-2012
RPS0A	YPR163C	0.00948897	Co-expression	Aceituno-Agosin-2012
RPS0B	RPS0A	0.0142122	Co-expression	Aceituno-Agosin-2012
RPS0B	YGL076C	0.0132007	Co-expression	Aceituno-Agosin-2012
RPS0B	YHR128W	0.0149787	Co-expression	Aceituno-Agosin-2012
RPS0B	YHR193C	0.015747	Co-expression	Aceituno-Agosin-2012
RPS0B	YIL053W	0.0128981	Co-expression	Aceituno-Agosin-2012
RPS0B	YIL133C	0.0134978	Co-expression	Aceituno-Agosin-2012
RPS0B	YJL177W	0.0157371	Co-expression	Aceituno-Agosin-2012
RPS0B	YKL180W	0.0176279	Co-expression	Aceituno-Agosin-2012
RPS0B	YNL069C	0.0155438	Co-expression	Aceituno-Agosin-2012
RPS0B	YNL096C	0.0138866	Co-expression	Aceituno-Agosin-2012
RPS0B	YPL081W	0.0163895	Co-expression	Aceituno-Agosin-2012
RPS14A	RPL13A	0.0117345	Co-expression	Aceituno-Agosin-2012
RPS14A	RPL13B	0.0151579	Co-expression	Aceituno-Agosin-2012
RPS14A	RPS26B	0.0146488	Co-expression	Aceituno-Agosin-2012
RPS14A	RPS28A	0.0106784	Co-expression	Aceituno-Agosin-2012
RPS14A	YBL092W	0.0133359	Co-expression	Aceituno-Agosin-2012
RPS14A	YBR189W	0.016259	Co-expression	Aceituno-Agosin-2012
RPS14A	YBR191W	0.0181809	Co-expression	Aceituno-Agosin-2012
RPS14A	YDL075W	0.0139747	Co-expression	Aceituno-Agosin-2012
RPS14A	YDR064W	0.0128167	Co-expression	Aceituno-Agosin-2012
RPS14A	YDR471W	0.0129096	Co-expression	Aceituno-Agosin-2012
RPS14A	YER056C-A	0.0138328	Co-expression	Aceituno-Agosin-2012
RPS14A	YFL034C-A	0.0135295	Co-expression	Aceituno-Agosin-2012
RPS14A	YGL031C	0.0146395	Co-expression	Aceituno-Agosin-2012
RPS14A	YGL076C	0.013393	Co-expression	Aceituno-Agosin-2012
RPS14A	YGL147C	0.0135942	Co-expression	Aceituno-Agosin-2012
RPS14A	YGR027C	0.0115482	Co-expression	Aceituno-Agosin-2012
RPS14A	YGR148C	0.0137505	Co-expression	Aceituno-Agosin-2012
RPS14A	YHL001W	0.0161955	Co-expression	Aceituno-Agosin-2012
RPS14A	YHL015W	0.0133508	Co-expression	Aceituno-Agosin-2012
RPS14A	YHR128W	0.0138184	Co-expression	Aceituno-Agosin-2012
RPS14A	YIL052C	0.0150146	Co-expression	Aceituno-Agosin-2012
RPS14A	YJL177W	0.0141651	Co-expression	Aceituno-Agosin-2012
RPS14A	YKL006W	0.0129147	Co-expression	Aceituno-Agosin-2012
RPS14A	YLR061W	0.0167758	Co-expression	Aceituno-Agosin-2012
RPS14A	YLR344W	0.0112671	Co-expression	Aceituno-Agosin-2012
RPS14A	YLR406C	0.013579	Co-expression	Aceituno-Agosin-2012
RPS14A	YLR441C	0.011011	Co-expression	Aceituno-Agosin-2012
RPS14A	YML024W	0.0150614	Co-expression	Aceituno-Agosin-2012
RPS14A	YML063W	0.0114631	Co-expression	Aceituno-Agosin-2012
RPS14A	YML073C	0.0150829	Co-expression	Aceituno-Agosin-2012
RPS14A	YNL069C	0.0182536	Co-expression	Aceituno-Agosin-2012
RPS14A	YNL096C	0.0129573	Co-expression	Aceituno-Agosin-2012
RPS14A	YNL302C	0.0149035	Co-expression	Aceituno-Agosin-2012
RPS14A	YOL121C	0.0136269	Co-expression	Aceituno-Agosin-2012
RPS14A	YOR096W	0.0125965	Co-expression	Aceituno-Agosin-2012
RPS14A	YOR234C	0.0109973	Co-expression	Aceituno-Agosin-2012
RPS14A	YPL079W	0.0153013	Co-expression	Aceituno-Agosin-2012
RPS26A	RPS0B	0.0151543	Co-expression	Aceituno-Agosin-2012
RPS26A	RPS26B	0.0156223	Co-expression	Aceituno-Agosin-2012
RPS26A	RPS29B	0.0165434	Co-expression	Aceituno-Agosin-2012
RPS26A	YDL014W	0.0098311	Co-expression	Aceituno-Agosin-2012
RPS26A	YDL075W	0.014114	Co-expression	Aceituno-Agosin-2012
RPS26A	YGL031C	0.0150836	Co-expression	Aceituno-Agosin-2012
RPS26A	YHR193C	0.0160957	Co-expression	Aceituno-Agosin-2012
RPS26A	YIL052C	0.015229	Co-expression	Aceituno-Agosin-2012
RPS26A	YJL177W	0.0168401	Co-expression	Aceituno-Agosin-2012
RPS26A	YLR061W	0.0157279	Co-expression	Aceituno-Agosin-2012
RPS26A	YNL069C	0.0155754	Co-expression	Aceituno-Agosin-2012
RPS26A	YPL081W	0.0168438	Co-expression	Aceituno-Agosin-2012
RPS26B	RPL13B	0.0158936	Co-expression	Aceituno-Agosin-2012
RPS26B	YBL092W	0.0122502	Co-expression	Aceituno-Agosin-2012
RPS26B	YBR189W	0.0169713	Co-expression	Aceituno-Agosin-2012
RPS26B	YBR191W	0.0170836	Co-expression	Aceituno-Agosin-2012
RPS26B	YDL075W	0.0156183	Co-expression	Aceituno-Agosin-2012
RPS26B	YDR064W	0.0125126	Co-expression	Aceituno-Agosin-2012
RPS26B	YDR382W	0.0176351	Co-expression	Aceituno-Agosin-2012
RPS26B	YDR471W	0.0138635	Co-expression	Aceituno-Agosin-2012
RPS26B	YER056C-A	0.0130924	Co-expression	Aceituno-Agosin-2012
RPS26B	YGL031C	0.0197866	Co-expression	Aceituno-Agosin-2012
RPS26B	YGL076C	0.0133642	Co-expression	Aceituno-Agosin-2012
RPS26B	YGR148C	0.0174582	Co-expression	Aceituno-Agosin-2012
RPS26B	YHL001W	0.0176641	Co-expression	Aceituno-Agosin-2012
RPS26B	YHL015W	0.0139006	Co-expression	Aceituno-Agosin-2012
RPS26B	YIL052C	0.0146514	Co-expression	Aceituno-Agosin-2012
RPS26B	YJL136C	0.018357	Co-expression	Aceituno-Agosin-2012
RPS26B	YJL177W	0.0171913	Co-expression	Aceituno-Agosin-2012
RPS26B	YKR057W	0.017573	Co-expression	Aceituno-Agosin-2012
RPS26B	YLR061W	0.0166433	Co-expression	Aceituno-Agosin-2012
RPS26B	YLR333C	0.0164228	Co-expression	Aceituno-Agosin-2012
RPS26B	YLR367W	0.014983	Co-expression	Aceituno-Agosin-2012
RPS26B	YLR388W	0.0163117	Co-expression	Aceituno-Agosin-2012
RPS26B	YLR406C	0.0167487	Co-expression	Aceituno-Agosin-2012
RPS26B	YNL069C	0.016206	Co-expression	Aceituno-Agosin-2012
RPS26B	YOL121C	0.0137262	Co-expression	Aceituno-Agosin-2012
RPS26B	YOR096W	0.0123381	Co-expression	Aceituno-Agosin-2012
RPS26B	YPL079W	0.0145204	Co-expression	Aceituno-Agosin-2012
RPS27B	RPL15A	0.0136804	Co-expression	Aceituno-Agosin-2012
RPS27B	RPP1A	0.0172432	Co-expression	Aceituno-Agosin-2012
RPS27B	RPS28A	0.0122888	Co-expression	Aceituno-Agosin-2012
RPS27B	YDR002W	0.013757	Co-expression	Aceituno-Agosin-2012
RPS27B	YGL103W	0.0172184	Co-expression	Aceituno-Agosin-2012
RPS27B	YGR034W	0.0142537	Co-expression	Aceituno-Agosin-2012
RPS27B	YHR010W	0.0124381	Co-expression	Aceituno-Agosin-2012
RPS27B	YJL190C	0.0149853	Co-expression	Aceituno-Agosin-2012
RPS27B	YKL006W	0.0150878	Co-expression	Aceituno-Agosin-2012
RPS27B	YLR325C	0.0171233	Co-expression	Aceituno-Agosin-2012
RPS27B	YLR344W	0.0109423	Co-expression	Aceituno-Agosin-2012
RPS27B	YLR441C	0.0108864	Co-expression	Aceituno-Agosin-2012
RPS27B	YMR230W	0.0181471	Co-expression	Aceituno-Agosin-2012
RPS27B	YOL127W	0.0116469	Co-expression	Aceituno-Agosin-2012
RPS27B	YOR234C	0.0121343	Co-expression	Aceituno-Agosin-2012
RPS27B	YOR293W	0.016491	Co-expression	Aceituno-Agosin-2012
RPS27B	YOR369C	0.0169964	Co-expression	Aceituno-Agosin-2012
RPS27B	YPL143W	0.0120854	Co-expression	Aceituno-Agosin-2012
RPS27B	YPR102C	0.0132404	Co-expression	Aceituno-Agosin-2012
RPS28A	RPP1A	0.0120986	Co-expression	Aceituno-Agosin-2012
RPS28A	RPS31	0.0116821	Co-expression	Aceituno-Agosin-2012
RPS28A	YBL092W	0.0108033	Co-expression	Aceituno-Agosin-2012
RPS28A	YDR447C	0.012015	Co-expression	Aceituno-Agosin-2012
RPS28A	YFL034C-A	0.00976478	Co-expression	Aceituno-Agosin-2012
RPS28A	YGL103W	0.0124073	Co-expression	Aceituno-Agosin-2012
RPS28A	YGL147C	0.0117669	Co-expression	Aceituno-Agosin-2012
RPS28A	YGR027C	0.00995549	Co-expression	Aceituno-Agosin-2012
RPS28A	YGR034W	0.0117311	Co-expression	Aceituno-Agosin-2012
RPS28A	YGR085C	0.0136982	Co-expression	Aceituno-Agosin-2012
RPS28A	YHL001W	0.0114828	Co-expression	Aceituno-Agosin-2012
RPS28A	YHR010W	0.0103443	Co-expression	Aceituno-Agosin-2012
RPS28A	YJL190C	0.0120258	Co-expression	Aceituno-Agosin-2012
RPS28A	YKL006W	0.0120773	Co-expression	Aceituno-Agosin-2012
RPS28A	YLR075W	0.00982148	Co-expression	Aceituno-Agosin-2012
RPS28A	YLR325C	0.0129971	Co-expression	Aceituno-Agosin-2012
RPS28A	YLR344W	0.00995268	Co-expression	Aceituno-Agosin-2012
RPS28A	YLR441C	0.00939865	Co-expression	Aceituno-Agosin-2012
RPS28A	YML063W	0.00841632	Co-expression	Aceituno-Agosin-2012
RPS28A	YML073C	0.0105698	Co-expression	Aceituno-Agosin-2012
RPS28A	YMR230W	0.012743	Co-expression	Aceituno-Agosin-2012
RPS28A	YNL096C	0.010533	Co-expression	Aceituno-Agosin-2012
RPS28A	YNL302C	0.0128202	Co-expression	Aceituno-Agosin-2012
RPS28A	YOL121C	0.0106502	Co-expression	Aceituno-Agosin-2012
RPS28A	YOL127W	0.0097556	Co-expression	Aceituno-Agosin-2012
RPS28A	YOR234C	0.0103086	Co-expression	Aceituno-Agosin-2012
RPS28A	YOR293W	0.0124062	Co-expression	Aceituno-Agosin-2012
RPS28A	YOR369C	0.0121594	Co-expression	Aceituno-Agosin-2012
RPS28A	YPL143W	0.00983567	Co-expression	Aceituno-Agosin-2012
RPS28A	YPR102C	0.0107537	Co-expression	Aceituno-Agosin-2012
RPS28B	RPL13A	0.00984875	Co-expression	Aceituno-Agosin-2012
RPS28B	RPL15A	0.0114945	Co-expression	Aceituno-Agosin-2012
RPS28B	RPL39	0.0125364	Co-expression	Aceituno-Agosin-2012
RPS28B	RPP1A	0.0127236	Co-expression	Aceituno-Agosin-2012
RPS28B	RPS27B	0.0131819	Co-expression	Aceituno-Agosin-2012
RPS28B	RPS28A	0.010997	Co-expression	Aceituno-Agosin-2012
RPS28B	YBL092W	0.0109385	Co-expression	Aceituno-Agosin-2012
RPS28B	YGL103W	0.0129692	Co-expression	Aceituno-Agosin-2012
RPS28B	YGL147C	0.0115113	Co-expression	Aceituno-Agosin-2012
RPS28B	YGR027C	0.0106162	Co-expression	Aceituno-Agosin-2012
RPS28B	YGR034W	0.0127211	Co-expression	Aceituno-Agosin-2012
RPS28B	YGR085C	0.0142481	Co-expression	Aceituno-Agosin-2012
RPS28B	YHR010W	0.0106873	Co-expression	Aceituno-Agosin-2012
RPS28B	YJL190C	0.0125364	Co-expression	Aceituno-Agosin-2012
RPS28B	YKL006W	0.0126742	Co-expression	Aceituno-Agosin-2012
RPS28B	YLR325C	0.0132073	Co-expression	Aceituno-Agosin-2012
RPS28B	YLR344W	0.010376	Co-expression	Aceituno-Agosin-2012
RPS28B	YLR441C	0.00972829	Co-expression	Aceituno-Agosin-2012
RPS28B	YML063W	0.00866851	Co-expression	Aceituno-Agosin-2012
RPS28B	YML073C	0.0112728	Co-expression	Aceituno-Agosin-2012
RPS28B	YMR230W	0.013659	Co-expression	Aceituno-Agosin-2012
RPS28B	YNL096C	0.0119776	Co-expression	Aceituno-Agosin-2012
RPS28B	YNL302C	0.013526	Co-expression	Aceituno-Agosin-2012
RPS28B	YOL127W	0.0101943	Co-expression	Aceituno-Agosin-2012
RPS28B	YOR234C	0.0109844	Co-expression	Aceituno-Agosin-2012
RPS28B	YOR293W	0.0133362	Co-expression	Aceituno-Agosin-2012
RPS28B	YOR369C	0.0126574	Co-expression	Aceituno-Agosin-2012
RPS28B	YPL143W	0.0101155	Co-expression	Aceituno-Agosin-2012
RPS28B	YPR041W	0.0123666	Co-expression	Aceituno-Agosin-2012
RPS28B	YPR102C	0.0111368	Co-expression	Aceituno-Agosin-2012
RPS29B	RPL13A	0.0117777	Co-expression	Aceituno-Agosin-2012
RPS29B	RPS0B	0.0184058	Co-expression	Aceituno-Agosin-2012
RPS29B	YDL075W	0.013776	Co-expression	Aceituno-Agosin-2012
RPS29B	YDR471W	0.0128527	Co-expression	Aceituno-Agosin-2012
RPS29B	YHL001W	0.0190093	Co-expression	Aceituno-Agosin-2012
RPS29B	YIL053W	0.0141056	Co-expression	Aceituno-Agosin-2012
RPS29B	YJL177W	0.0170955	Co-expression	Aceituno-Agosin-2012
RPS29B	YKL006W	0.0147563	Co-expression	Aceituno-Agosin-2012
RPS29B	YKL180W	0.0173289	Co-expression	Aceituno-Agosin-2012
RPS29B	YNL096C	0.0141668	Co-expression	Aceituno-Agosin-2012
RPS29B	YPL081W	0.0184619	Co-expression	Aceituno-Agosin-2012
RPS31	YDR447C	0.0172603	Co-expression	Aceituno-Agosin-2012
RPS31	YGL030W	0.0176445	Co-expression	Aceituno-Agosin-2012
RPS31	YGL103W	0.0170117	Co-expression	Aceituno-Agosin-2012
RPS31	YGL147C	0.01532	Co-expression	Aceituno-Agosin-2012
RPS31	YGR027C	0.0131432	Co-expression	Aceituno-Agosin-2012
RPS31	YHR010W	0.0129264	Co-expression	Aceituno-Agosin-2012
RPS31	YJL190C	0.0148551	Co-expression	Aceituno-Agosin-2012
RPS31	YLR325C	0.0173974	Co-expression	Aceituno-Agosin-2012
RPS31	YLR441C	0.0117001	Co-expression	Aceituno-Agosin-2012
RPS31	YML063W	0.0105751	Co-expression	Aceituno-Agosin-2012
RPS31	YNL178W	0.0173697	Co-expression	Aceituno-Agosin-2012
RPS31	YNL302C	0.016689	Co-expression	Aceituno-Agosin-2012
RPS31	YOL127W	0.0119864	Co-expression	Aceituno-Agosin-2012
RPS31	YOR234C	0.01192	Co-expression	Aceituno-Agosin-2012
RPS31	YOR293W	0.0154714	Co-expression	Aceituno-Agosin-2012
RPS31	YPL143W	0.0133814	Co-expression	Aceituno-Agosin-2012
RPS31	YPR102C	0.0145773	Co-expression	Aceituno-Agosin-2012
YAL003W	YDR064W	0.0138149	Co-expression	Aceituno-Agosin-2012
YAL003W	YER056C-A	0.0143357	Co-expression	Aceituno-Agosin-2012
YAL003W	YGL076C	0.0148019	Co-expression	Aceituno-Agosin-2012
YAL003W	YGR148C	0.0158039	Co-expression	Aceituno-Agosin-2012
YAL003W	YJR123W	0.016541	Co-expression	Aceituno-Agosin-2012
YAL003W	YLR388W	0.0173663	Co-expression	Aceituno-Agosin-2012
YAL012W	YFL022C	0.010536	Co-expression	Aceituno-Agosin-2012
YAL012W	YGR204W	0.0101737	Co-expression	Aceituno-Agosin-2012
YAL012W	YHR019C	0.00831993	Co-expression	Aceituno-Agosin-2012
YAL012W	YJL159W	0.0118302	Co-expression	Aceituno-Agosin-2012
YAL012W	YOR063W	0.00943672	Co-expression	Aceituno-Agosin-2012
YAR015W	YBR031W	0.0124712	Co-expression	Aceituno-Agosin-2012
YAR015W	YMR120C	0.0178418	Co-expression	Aceituno-Agosin-2012
YBL045C	YBL099W	0.0148537	Co-expression	Aceituno-Agosin-2012
YBL092W	YBR191W	0.0149874	Co-expression	Aceituno-Agosin-2012
YBL092W	YDL075W	0.0118476	Co-expression	Aceituno-Agosin-2012
YBL092W	YDR447C	0.0133662	Co-expression	Aceituno-Agosin-2012
YBL092W	YML024W	0.0137593	Co-expression	Aceituno-Agosin-2012
YBL092W	YNL302C	0.0136919	Co-expression	Aceituno-Agosin-2012
YBL092W	YOL121C	0.0119839	Co-expression	Aceituno-Agosin-2012
YBL092W	YOR293W	0.0125809	Co-expression	Aceituno-Agosin-2012
YBR011C	YDR037W	0.00603088	Co-expression	Aceituno-Agosin-2012
YBR011C	YER165W	0.0077316	Co-expression	Aceituno-Agosin-2012
YBR011C	YLR150W	0.00732545	Co-expression	Aceituno-Agosin-2012
YBR011C	YMR205C	0.00677451	Co-expression	Aceituno-Agosin-2012
YBR011C	YOL040C	0.00704362	Co-expression	Aceituno-Agosin-2012
YBR011C	YOR332W	0.0068199	Co-expression	Aceituno-Agosin-2012
YBR079C	YCR088W	0.0090918	Co-expression	Aceituno-Agosin-2012
YBR079C	YDL014W	0.00593867	Co-expression	Aceituno-Agosin-2012
YBR079C	YFL022C	0.00675605	Co-expression	Aceituno-Agosin-2012
YBR079C	YHR019C	0.00546469	Co-expression	Aceituno-Agosin-2012
YBR079C	YLR192C	0.00607535	Co-expression	Aceituno-Agosin-2012
YBR127C	YDL229W	0.00967434	Co-expression	Aceituno-Agosin-2012
YBR127C	YLR060W	0.00824655	Co-expression	Aceituno-Agosin-2012
YBR127C	YNL209W	0.0103344	Co-expression	Aceituno-Agosin-2012
YBR127C	YOR375C	0.0121365	Co-expression	Aceituno-Agosin-2012
YBR169C	YCL035C	0.012083	Co-expression	Aceituno-Agosin-2012
YBR169C	YDL110C	0.0130747	Co-expression	Aceituno-Agosin-2012
YBR169C	YDR513W	0.0127068	Co-expression	Aceituno-Agosin-2012
YBR169C	YHR087W	0.0129892	Co-expression	Aceituno-Agosin-2012
YBR169C	YMR105C	0.0142797	Co-expression	Aceituno-Agosin-2012
YBR169C	YNR034W-A	0.0142038	Co-expression	Aceituno-Agosin-2012
YBR169C	YPR160W	0.0120724	Co-expression	Aceituno-Agosin-2012
YBR189W	YBL092W	0.012465	Co-expression	Aceituno-Agosin-2012
YBR189W	YBR191W	0.0178671	Co-expression	Aceituno-Agosin-2012
YBR189W	YDL075W	0.0143328	Co-expression	Aceituno-Agosin-2012
YBR189W	YDR064W	0.0134332	Co-expression	Aceituno-Agosin-2012
YBR189W	YER056C-A	0.0145948	Co-expression	Aceituno-Agosin-2012
YBR189W	YHL001W	0.0170104	Co-expression	Aceituno-Agosin-2012
YBR189W	YHL015W	0.0148308	Co-expression	Aceituno-Agosin-2012
YBR189W	YML073C	0.0148383	Co-expression	Aceituno-Agosin-2012
YBR189W	YNL069C	0.0174268	Co-expression	Aceituno-Agosin-2012
YBR189W	YOL121C	0.0144218	Co-expression	Aceituno-Agosin-2012
YBR189W	YOR096W	0.0130665	Co-expression	Aceituno-Agosin-2012
YBR191W	YDL075W	0.015505	Co-expression	Aceituno-Agosin-2012
YBR191W	YER056C-A	0.0148486	Co-expression	Aceituno-Agosin-2012
YBR191W	YOL121C	0.0156821	Co-expression	Aceituno-Agosin-2012
YBR196C	YFL045C	0.0139426	Co-expression	Aceituno-Agosin-2012
YBR221C	YBL099W	0.012356	Co-expression	Aceituno-Agosin-2012
YBR221C	YBR031W	0.0115289	Co-expression	Aceituno-Agosin-2012
YBR221C	YFL018C	0.0141741	Co-expression	Aceituno-Agosin-2012
YBR263W	YDR012W	0.0173157	Co-expression	Aceituno-Agosin-2012
YBR263W	YGL253W	0.0142889	Co-expression	Aceituno-Agosin-2012
YBR263W	YMR120C	0.0158779	Co-expression	Aceituno-Agosin-2012
YCL035C	YHR087W	0.0117789	Co-expression	Aceituno-Agosin-2012
YCL035C	YNR034W-A	0.0130904	Co-expression	Aceituno-Agosin-2012
YCR053W	YDR037W	0.00658785	Co-expression	Aceituno-Agosin-2012
YCR053W	YER165W	0.00866806	Co-expression	Aceituno-Agosin-2012
YCR053W	YHL033C	0.0121867	Co-expression	Aceituno-Agosin-2012
YCR053W	YLR150W	0.00817655	Co-expression	Aceituno-Agosin-2012
YCR053W	YLR293C	0.00829205	Co-expression	Aceituno-Agosin-2012
YCR053W	YLR448W	0.00946684	Co-expression	Aceituno-Agosin-2012
YCR053W	YOL040C	0.00791626	Co-expression	Aceituno-Agosin-2012
YCR088W	YDL195W	0.0181237	Co-expression	Aceituno-Agosin-2012
YCR088W	YHR019C	0.00936784	Co-expression	Aceituno-Agosin-2012
YDL014W	YFL022C	0.00785303	Co-expression	Aceituno-Agosin-2012
YDL014W	YGL234W	0.00861741	Co-expression	Aceituno-Agosin-2012
YDL014W	YHR019C	0.00653535	Co-expression	Aceituno-Agosin-2012
YDL014W	YOR063W	0.00703004	Co-expression	Aceituno-Agosin-2012
YDL066W	YBR011C	0.00835784	Co-expression	Aceituno-Agosin-2012
YDL066W	YDL171C	0.0128608	Co-expression	Aceituno-Agosin-2012
YDL066W	YDR037W	0.00754381	Co-expression	Aceituno-Agosin-2012
YDL066W	YER165W	0.0100547	Co-expression	Aceituno-Agosin-2012
YDL066W	YGL105W	0.0079951	Co-expression	Aceituno-Agosin-2012
YDL066W	YLR150W	0.00920557	Co-expression	Aceituno-Agosin-2012
YDL066W	YMR205C	0.0086054	Co-expression	Aceituno-Agosin-2012
YDL110C	YEL011W	0.0131815	Co-expression	Aceituno-Agosin-2012
YDL110C	YPR160W	0.012241	Co-expression	Aceituno-Agosin-2012
YDL185W	YDR037W	0.00724903	Co-expression	Aceituno-Agosin-2012
YDL185W	YMR205C	0.00831481	Co-expression	Aceituno-Agosin-2012
YDL195W	YFL022C	0.0130739	Co-expression	Aceituno-Agosin-2012
YDL195W	YHR019C	0.0106823	Co-expression	Aceituno-Agosin-2012
YDL229W	YDR037W	0.00720222	Co-expression	Aceituno-Agosin-2012
YDL229W	YIL051C	0.0122113	Co-expression	Aceituno-Agosin-2012
YDL229W	YKL152C	0.0104248	Co-expression	Aceituno-Agosin-2012
YDL229W	YLR150W	0.0091356	Co-expression	Aceituno-Agosin-2012
YDL229W	YMR205C	0.00844594	Co-expression	Aceituno-Agosin-2012
YDL229W	YNL209W	0.0109176	Co-expression	Aceituno-Agosin-2012
YDL229W	YOL040C	0.00915068	Co-expression	Aceituno-Agosin-2012
YDL229W	YPR163C	0.00960802	Co-expression	Aceituno-Agosin-2012
YDR002W	YOL127W	0.0103649	Co-expression	Aceituno-Agosin-2012
YDR002W	YOR369C	0.0142261	Co-expression	Aceituno-Agosin-2012
YDR023W	YNL067W	0.0144742	Co-expression	Aceituno-Agosin-2012
YDR037W	YER165W	0.00711244	Co-expression	Aceituno-Agosin-2012
YDR037W	YKL152C	0.00747379	Co-expression	Aceituno-Agosin-2012
YDR037W	YLR150W	0.00667469	Co-expression	Aceituno-Agosin-2012
YDR037W	YMR205C	0.00629459	Co-expression	Aceituno-Agosin-2012
YDR037W	YOL040C	0.00653898	Co-expression	Aceituno-Agosin-2012
YDR064W	YBR191W	0.0138202	Co-expression	Aceituno-Agosin-2012
YDR064W	YDR447C	0.0132314	Co-expression	Aceituno-Agosin-2012
YDR064W	YER056C-A	0.0132097	Co-expression	Aceituno-Agosin-2012
YDR064W	YJR123W	0.0132498	Co-expression	Aceituno-Agosin-2012
YDR064W	YML024W	0.0146295	Co-expression	Aceituno-Agosin-2012
YDR064W	YNL069C	0.0134284	Co-expression	Aceituno-Agosin-2012
YDR064W	YOR096W	0.0126654	Co-expression	Aceituno-Agosin-2012
YDR071C	YKL056C	0.0118395	Co-expression	Aceituno-Agosin-2012
YDR091C	YFL034C-A	0.0139952	Co-expression	Aceituno-Agosin-2012
YDR091C	YGL030W	0.0156124	Co-expression	Aceituno-Agosin-2012
YDR091C	YGR027C	0.0121851	Co-expression	Aceituno-Agosin-2012
YDR091C	YHR128W	0.0139583	Co-expression	Aceituno-Agosin-2012
YDR127W	YGL234W	0.0103324	Co-expression	Aceituno-Agosin-2012
YDR127W	YGR061C	0.0094945	Co-expression	Aceituno-Agosin-2012
YDR127W	YJL130C	0.0088963	Co-expression	Aceituno-Agosin-2012
YDR127W	YJR121W	0.0116636	Co-expression	Aceituno-Agosin-2012
YDR127W	YOR063W	0.00789059	Co-expression	Aceituno-Agosin-2012
YDR148C	YBL045C	0.0135734	Co-expression	Aceituno-Agosin-2012
YDR148C	YBL099W	0.0124733	Co-expression	Aceituno-Agosin-2012
YDR148C	YFL018C	0.0131717	Co-expression	Aceituno-Agosin-2012
YDR148C	YOR142W	0.0104073	Co-expression	Aceituno-Agosin-2012
YDR298C	YDL004W	0.00929281	Co-expression	Aceituno-Agosin-2012
YDR382W	YHL001W	0.017693	Co-expression	Aceituno-Agosin-2012
YDR382W	YLR406C	0.0158408	Co-expression	Aceituno-Agosin-2012
YDR447C	YML024W	0.0190519	Co-expression	Aceituno-Agosin-2012
YDR447C	YNL302C	0.0162359	Co-expression	Aceituno-Agosin-2012
YDR447C	YOR096W	0.0150179	Co-expression	Aceituno-Agosin-2012
YDR447C	YPL143W	0.0117407	Co-expression	Aceituno-Agosin-2012
YDR471W	YBL092W	0.0112473	Co-expression	Aceituno-Agosin-2012
YDR471W	YBR189W	0.0134158	Co-expression	Aceituno-Agosin-2012
YDR471W	YBR191W	0.0146306	Co-expression	Aceituno-Agosin-2012
YDR471W	YDL075W	0.0131612	Co-expression	Aceituno-Agosin-2012
YDR471W	YGL031C	0.01405	Co-expression	Aceituno-Agosin-2012
YDR471W	YGR034W	0.0114386	Co-expression	Aceituno-Agosin-2012
YDR471W	YHL001W	0.0154506	Co-expression	Aceituno-Agosin-2012
YDR471W	YHL015W	0.0116711	Co-expression	Aceituno-Agosin-2012
YDR471W	YHR010W	0.00985644	Co-expression	Aceituno-Agosin-2012
YDR471W	YIL052C	0.0124113	Co-expression	Aceituno-Agosin-2012
YDR471W	YJL177W	0.0123281	Co-expression	Aceituno-Agosin-2012
YDR471W	YJL190C	0.0110017	Co-expression	Aceituno-Agosin-2012
YDR471W	YKL006W	0.0117159	Co-expression	Aceituno-Agosin-2012
YDR471W	YLR061W	0.0123352	Co-expression	Aceituno-Agosin-2012
YDR471W	YLR344W	0.0101416	Co-expression	Aceituno-Agosin-2012
YDR471W	YLR406C	0.0137334	Co-expression	Aceituno-Agosin-2012
YDR471W	YLR441C	0.0106864	Co-expression	Aceituno-Agosin-2012
YDR471W	YML063W	0.00908863	Co-expression	Aceituno-Agosin-2012
YDR471W	YML073C	0.0117323	Co-expression	Aceituno-Agosin-2012
YDR471W	YMR230W	0.0130322	Co-expression	Aceituno-Agosin-2012
YDR471W	YNL069C	0.0139262	Co-expression	Aceituno-Agosin-2012
YDR471W	YNL096C	0.0108742	Co-expression	Aceituno-Agosin-2012
YDR471W	YOL121C	0.0135817	Co-expression	Aceituno-Agosin-2012
YDR471W	YOL127W	0.00925648	Co-expression	Aceituno-Agosin-2012
YDR471W	YOR234C	0.0102448	Co-expression	Aceituno-Agosin-2012
YDR471W	YOR369C	0.0133765	Co-expression	Aceituno-Agosin-2012
YDR471W	YPL079W	0.012426	Co-expression	Aceituno-Agosin-2012
YDR471W	YPR102C	0.0111456	Co-expression	Aceituno-Agosin-2012
YDR513W	YCL035C	0.0119197	Co-expression	Aceituno-Agosin-2012
YDR513W	YHR087W	0.011825	Co-expression	Aceituno-Agosin-2012
YDR513W	YKL067W	0.00965894	Co-expression	Aceituno-Agosin-2012
YDR513W	YNR034W-A	0.0126191	Co-expression	Aceituno-Agosin-2012
YDR513W	YPR160W	0.0108556	Co-expression	Aceituno-Agosin-2012
YDR516C	YNR034W-A	0.0152388	Co-expression	Aceituno-Agosin-2012
YDR516C	YOR136W	0.0140272	Co-expression	Aceituno-Agosin-2012
YDR516C	YPR160W	0.0158848	Co-expression	Aceituno-Agosin-2012
YEL011W	YPR160W	0.0112906	Co-expression	Aceituno-Agosin-2012
YER012W	YDR002W	0.0129464	Co-expression	Aceituno-Agosin-2012
YER057C	YJR123W	0.0144723	Co-expression	Aceituno-Agosin-2012
YER057C	YLL045C	0.0137605	Co-expression	Aceituno-Agosin-2012
YER057C	YLR388W	0.0139069	Co-expression	Aceituno-Agosin-2012
YER062C	YLL050C	0.0153063	Co-expression	Aceituno-Agosin-2012
YER091C	YBL099W	0.0123314	Co-expression	Aceituno-Agosin-2012
YER091C	YGR155W	0.0138871	Co-expression	Aceituno-Agosin-2012
YER165W	YLR150W	0.00879554	Co-expression	Aceituno-Agosin-2012
YER165W	YMR205C	0.00790268	Co-expression	Aceituno-Agosin-2012
YER165W	YOL040C	0.00856532	Co-expression	Aceituno-Agosin-2012
YFL018C	YBR031W	0.0121775	Co-expression	Aceituno-Agosin-2012
YFL022C	YHR019C	0.00726624	Co-expression	Aceituno-Agosin-2012
YFL034C-A	YBL092W	0.0114679	Co-expression	Aceituno-Agosin-2012
YFL034C-A	YBR191W	0.0145345	Co-expression	Aceituno-Agosin-2012
YFL034C-A	YDL075W	0.0114833	Co-expression	Aceituno-Agosin-2012
YFL034C-A	YDR447C	0.013882	Co-expression	Aceituno-Agosin-2012
YFL034C-A	YER056C-A	0.0118625	Co-expression	Aceituno-Agosin-2012
YFL034C-A	YGL030W	0.0139393	Co-expression	Aceituno-Agosin-2012
YFL034C-A	YGR027C	0.0109441	Co-expression	Aceituno-Agosin-2012
YFL034C-A	YIL052C	0.0132709	Co-expression	Aceituno-Agosin-2012
YFL034C-A	YLR406C	0.0120669	Co-expression	Aceituno-Agosin-2012
YFL034C-A	YML024W	0.0139227	Co-expression	Aceituno-Agosin-2012
YFL034C-A	YML063W	0.00988411	Co-expression	Aceituno-Agosin-2012
YFL034C-A	YML073C	0.0124828	Co-expression	Aceituno-Agosin-2012
YFL034C-A	YNL069C	0.0131469	Co-expression	Aceituno-Agosin-2012
YFL045C	YDL130W	0.0136664	Co-expression	Aceituno-Agosin-2012
YFL045C	YMR116C	0.0146665	Co-expression	Aceituno-Agosin-2012
YGL030W	YPL143W	0.0127317	Co-expression	Aceituno-Agosin-2012
YGL031C	YBR189W	0.0172333	Co-expression	Aceituno-Agosin-2012
YGL031C	YBR191W	0.016878	Co-expression	Aceituno-Agosin-2012
YGL031C	YDL075W	0.0157678	Co-expression	Aceituno-Agosin-2012
YGL031C	YDR382W	0.0208639	Co-expression	Aceituno-Agosin-2012
YGL031C	YGR148C	0.0179601	Co-expression	Aceituno-Agosin-2012
YGL031C	YHL001W	0.0199727	Co-expression	Aceituno-Agosin-2012
YGL031C	YHL015W	0.0134133	Co-expression	Aceituno-Agosin-2012
YGL031C	YIL052C	0.0139877	Co-expression	Aceituno-Agosin-2012
YGL031C	YJL136C	0.0176237	Co-expression	Aceituno-Agosin-2012
YGL031C	YKR057W	0.0171452	Co-expression	Aceituno-Agosin-2012
YGL031C	YLR406C	0.0167477	Co-expression	Aceituno-Agosin-2012
YGL031C	YNL069C	0.0165643	Co-expression	Aceituno-Agosin-2012
YGL031C	YOL121C	0.0139191	Co-expression	Aceituno-Agosin-2012
YGL068W	YML078W	0.0107478	Co-expression	Aceituno-Agosin-2012
YGL068W	YOR020C	0.0117348	Co-expression	Aceituno-Agosin-2012
YGL076C	YBR189W	0.0144219	Co-expression	Aceituno-Agosin-2012
YGL076C	YBR191W	0.0144244	Co-expression	Aceituno-Agosin-2012
YGL076C	YER056C-A	0.0126126	Co-expression	Aceituno-Agosin-2012
YGL076C	YML073C	0.0127056	Co-expression	Aceituno-Agosin-2012
YGL076C	YNL069C	0.0146301	Co-expression	Aceituno-Agosin-2012
YGL103W	YHR010W	0.0125784	Co-expression	Aceituno-Agosin-2012
YGL103W	YNL302C	0.0167233	Co-expression	Aceituno-Agosin-2012
YGL103W	YOL121C	0.0147866	Co-expression	Aceituno-Agosin-2012
YGL103W	YOL127W	0.0122348	Co-expression	Aceituno-Agosin-2012
YGL103W	YOR293W	0.0153351	Co-expression	Aceituno-Agosin-2012
YGL103W	YOR369C	0.0169622	Co-expression	Aceituno-Agosin-2012
YGL103W	YPL143W	0.0133683	Co-expression	Aceituno-Agosin-2012
YGL103W	YPR102C	0.0137669	Co-expression	Aceituno-Agosin-2012
YGL105W	YDL185W	0.00766809	Co-expression	Aceituno-Agosin-2012
YGL105W	YDL229W	0.00809865	Co-expression	Aceituno-Agosin-2012
YGL105W	YDR037W	0.00581272	Co-expression	Aceituno-Agosin-2012
YGL105W	YER165W	0.00790342	Co-expression	Aceituno-Agosin-2012
YGL105W	YHR020W	0.00668675	Co-expression	Aceituno-Agosin-2012
YGL105W	YJL130C	0.00739818	Co-expression	Aceituno-Agosin-2012
YGL105W	YLR060W	0.00693857	Co-expression	Aceituno-Agosin-2012
YGL105W	YLR150W	0.0072258	Co-expression	Aceituno-Agosin-2012
YGL105W	YLR293C	0.00680712	Co-expression	Aceituno-Agosin-2012
YGL105W	YMR205C	0.00652973	Co-expression	Aceituno-Agosin-2012
YGL105W	YOL040C	0.00717116	Co-expression	Aceituno-Agosin-2012
YGL105W	YOR332W	0.00656541	Co-expression	Aceituno-Agosin-2012
YGL105W	YPR163C	0.00709018	Co-expression	Aceituno-Agosin-2012
YGL123W	YGL030W	0.0180625	Co-expression	Aceituno-Agosin-2012
YGL123W	YGL103W	0.0175738	Co-expression	Aceituno-Agosin-2012
YGL123W	YHL015W	0.0148538	Co-expression	Aceituno-Agosin-2012
YGL123W	YPL143W	0.012944	Co-expression	Aceituno-Agosin-2012
YGL147C	YBL092W	0.0129617	Co-expression	Aceituno-Agosin-2012
YGL147C	YBR189W	0.0132748	Co-expression	Aceituno-Agosin-2012
YGL147C	YBR191W	0.0150317	Co-expression	Aceituno-Agosin-2012
YGL147C	YDL075W	0.0120693	Co-expression	Aceituno-Agosin-2012
YGL147C	YDR447C	0.0163016	Co-expression	Aceituno-Agosin-2012
YGL147C	YGL103W	0.0151397	Co-expression	Aceituno-Agosin-2012
YGL147C	YGL123W	0.0149782	Co-expression	Aceituno-Agosin-2012
YGL147C	YGR027C	0.0117326	Co-expression	Aceituno-Agosin-2012
YGL147C	YGR034W	0.0133336	Co-expression	Aceituno-Agosin-2012
YGL147C	YGR085C	0.0155844	Co-expression	Aceituno-Agosin-2012
YGL147C	YHL015W	0.0145662	Co-expression	Aceituno-Agosin-2012
YGL147C	YHR010W	0.0123355	Co-expression	Aceituno-Agosin-2012
YGL147C	YJL190C	0.0141824	Co-expression	Aceituno-Agosin-2012
YGL147C	YKL006W	0.0133569	Co-expression	Aceituno-Agosin-2012
YGL147C	YLR075W	0.0124295	Co-expression	Aceituno-Agosin-2012
YGL147C	YLR325C	0.0151234	Co-expression	Aceituno-Agosin-2012
YGL147C	YLR344W	0.0119105	Co-expression	Aceituno-Agosin-2012
YGL147C	YLR441C	0.0116606	Co-expression	Aceituno-Agosin-2012
YGL147C	YML024W	0.0157278	Co-expression	Aceituno-Agosin-2012
YGL147C	YML063W	0.0109366	Co-expression	Aceituno-Agosin-2012
YGL147C	YNL178W	0.0146752	Co-expression	Aceituno-Agosin-2012
YGL147C	YNL302C	0.0152204	Co-expression	Aceituno-Agosin-2012
YGL147C	YOL121C	0.0137627	Co-expression	Aceituno-Agosin-2012
YGL147C	YOL127W	0.0113628	Co-expression	Aceituno-Agosin-2012
YGL147C	YOR096W	0.0128803	Co-expression	Aceituno-Agosin-2012
YGL147C	YOR234C	0.011791	Co-expression	Aceituno-Agosin-2012
YGL147C	YOR293W	0.0135168	Co-expression	Aceituno-Agosin-2012
YGL147C	YPL079W	0.0135858	Co-expression	Aceituno-Agosin-2012
YGL147C	YPL143W	0.0118507	Co-expression	Aceituno-Agosin-2012
YGL147C	YPR102C	0.0129793	Co-expression	Aceituno-Agosin-2012
YGL202W	YCR053W	0.00952242	Co-expression	Aceituno-Agosin-2012
YGL202W	YDR037W	0.00746183	Co-expression	Aceituno-Agosin-2012
YGL202W	YGL234W	0.0110669	Co-expression	Aceituno-Agosin-2012
YGL202W	YLR293C	0.00898152	Co-expression	Aceituno-Agosin-2012
YGL234W	YFL022C	0.00954386	Co-expression	Aceituno-Agosin-2012
YGL234W	YHR019C	0.00762938	Co-expression	Aceituno-Agosin-2012
YGL234W	YML056C	0.0101763	Co-expression	Aceituno-Agosin-2012
YGL234W	YOR063W	0.00884028	Co-expression	Aceituno-Agosin-2012
YGL253W	YDR012W	0.0138372	Co-expression	Aceituno-Agosin-2012
YGL253W	YHR216W	0.014167	Co-expression	Aceituno-Agosin-2012
YGL253W	YMR120C	0.0148207	Co-expression	Aceituno-Agosin-2012
YGR027C	YDR447C	0.0129437	Co-expression	Aceituno-Agosin-2012
YGR027C	YGL030W	0.0141333	Co-expression	Aceituno-Agosin-2012
YGR027C	YGL103W	0.0124516	Co-expression	Aceituno-Agosin-2012
YGR027C	YGL123W	0.0133325	Co-expression	Aceituno-Agosin-2012
YGR027C	YGR034W	0.0113906	Co-expression	Aceituno-Agosin-2012
YGR027C	YHR010W	0.00956481	Co-expression	Aceituno-Agosin-2012
YGR027C	YJL190C	0.0113806	Co-expression	Aceituno-Agosin-2012
YGR027C	YKL006W	0.0112478	Co-expression	Aceituno-Agosin-2012
YGR027C	YLR441C	0.00922731	Co-expression	Aceituno-Agosin-2012
YGR027C	YML024W	0.0121281	Co-expression	Aceituno-Agosin-2012
YGR027C	YML063W	0.00936241	Co-expression	Aceituno-Agosin-2012
YGR027C	YML073C	0.01106	Co-expression	Aceituno-Agosin-2012
YGR027C	YNL302C	0.0137209	Co-expression	Aceituno-Agosin-2012
YGR027C	YOL127W	0.00916587	Co-expression	Aceituno-Agosin-2012
YGR027C	YOR293W	0.0115857	Co-expression	Aceituno-Agosin-2012
YGR027C	YPL143W	0.0101628	Co-expression	Aceituno-Agosin-2012
YGR027C	YPR102C	0.0105475	Co-expression	Aceituno-Agosin-2012
YGR034W	YBL092W	0.0117782	Co-expression	Aceituno-Agosin-2012
YGR034W	YDR447C	0.0140554	Co-expression	Aceituno-Agosin-2012
YGR034W	YGL103W	0.0143324	Co-expression	Aceituno-Agosin-2012
YGR034W	YHR010W	0.0121101	Co-expression	Aceituno-Agosin-2012
YGR034W	YNL302C	0.0154187	Co-expression	Aceituno-Agosin-2012
YGR034W	YOL121C	0.0132809	Co-expression	Aceituno-Agosin-2012
YGR034W	YOL127W	0.0108976	Co-expression	Aceituno-Agosin-2012
YGR034W	YOR293W	0.015216	Co-expression	Aceituno-Agosin-2012
YGR034W	YOR369C	0.0149622	Co-expression	Aceituno-Agosin-2012
YGR034W	YPL143W	0.010855	Co-expression	Aceituno-Agosin-2012
YGR034W	YPR102C	0.0135458	Co-expression	Aceituno-Agosin-2012
YGR061C	YDL185W	0.00987504	Co-expression	Aceituno-Agosin-2012
YGR061C	YOR332W	0.00805478	Co-expression	Aceituno-Agosin-2012
YGR085C	YBL092W	0.0148597	Co-expression	Aceituno-Agosin-2012
YGR085C	YDR447C	0.0178114	Co-expression	Aceituno-Agosin-2012
YGR085C	YFL034C-A	0.0142665	Co-expression	Aceituno-Agosin-2012
YGR085C	YGR027C	0.01315	Co-expression	Aceituno-Agosin-2012
YGR085C	YGR034W	0.0157611	Co-expression	Aceituno-Agosin-2012
YGR085C	YHR010W	0.0142091	Co-expression	Aceituno-Agosin-2012
YGR085C	YJL190C	0.0157367	Co-expression	Aceituno-Agosin-2012
YGR085C	YKL006W	0.0151207	Co-expression	Aceituno-Agosin-2012
YGR085C	YLR325C	0.0185129	Co-expression	Aceituno-Agosin-2012
YGR085C	YLR441C	0.0134723	Co-expression	Aceituno-Agosin-2012
YGR085C	YML063W	0.0117259	Co-expression	Aceituno-Agosin-2012
YGR085C	YMR230W	0.0177177	Co-expression	Aceituno-Agosin-2012
YGR085C	YNL302C	0.0170812	Co-expression	Aceituno-Agosin-2012
YGR085C	YOL127W	0.0126652	Co-expression	Aceituno-Agosin-2012
YGR085C	YOR293W	0.0173351	Co-expression	Aceituno-Agosin-2012
YGR085C	YPL143W	0.0128172	Co-expression	Aceituno-Agosin-2012
YGR085C	YPR102C	0.0151039	Co-expression	Aceituno-Agosin-2012
YGR148C	YBR189W	0.0159883	Co-expression	Aceituno-Agosin-2012
YGR148C	YDL075W	0.0128215	Co-expression	Aceituno-Agosin-2012
YGR148C	YDR064W	0.0125413	Co-expression	Aceituno-Agosin-2012
YGR148C	YDR382W	0.0157411	Co-expression	Aceituno-Agosin-2012
YGR148C	YER056C-A	0.0135139	Co-expression	Aceituno-Agosin-2012
YGR148C	YGL076C	0.0145681	Co-expression	Aceituno-Agosin-2012
YGR148C	YHL001W	0.015524	Co-expression	Aceituno-Agosin-2012
YGR148C	YJL136C	0.0166597	Co-expression	Aceituno-Agosin-2012
YGR148C	YKR057W	0.0167859	Co-expression	Aceituno-Agosin-2012
YGR148C	YLR388W	0.0169326	Co-expression	Aceituno-Agosin-2012
YGR148C	YLR406C	0.014549	Co-expression	Aceituno-Agosin-2012
YGR148C	YML073C	0.0129648	Co-expression	Aceituno-Agosin-2012
YGR148C	YNL069C	0.0154815	Co-expression	Aceituno-Agosin-2012
YGR204W	YDL195W	0.0128974	Co-expression	Aceituno-Agosin-2012
YGR204W	YDR127W	0.00827598	Co-expression	Aceituno-Agosin-2012
YGR204W	YHR019C	0.00697878	Co-expression	Aceituno-Agosin-2012
YGR204W	YOR063W	0.00793401	Co-expression	Aceituno-Agosin-2012
YGR240C	YBR127C	0.00884709	Co-expression	Aceituno-Agosin-2012
YGR240C	YKL157W	0.0107892	Co-expression	Aceituno-Agosin-2012
YGR240C	YLR060W	0.00760307	Co-expression	Aceituno-Agosin-2012
YGR240C	YMR108W	0.00807653	Co-expression	Aceituno-Agosin-2012
YGR240C	YMR205C	0.00704766	Co-expression	Aceituno-Agosin-2012
YHL001W	YBL092W	0.0139595	Co-expression	Aceituno-Agosin-2012
YHL001W	YBR191W	0.0179043	Co-expression	Aceituno-Agosin-2012
YHL001W	YDL075W	0.0164851	Co-expression	Aceituno-Agosin-2012
YHL001W	YOL121C	0.0163041	Co-expression	Aceituno-Agosin-2012
YHL001W	YOL127W	0.0111362	Co-expression	Aceituno-Agosin-2012
YHL015W	YBL092W	0.0116919	Co-expression	Aceituno-Agosin-2012
YHL015W	YBR191W	0.0154208	Co-expression	Aceituno-Agosin-2012
YHL015W	YDL075W	0.0120846	Co-expression	Aceituno-Agosin-2012
YHL015W	YDR064W	0.0123653	Co-expression	Aceituno-Agosin-2012
YHL015W	YDR447C	0.0142816	Co-expression	Aceituno-Agosin-2012
YHL015W	YER056C-A	0.0129153	Co-expression	Aceituno-Agosin-2012
YHL015W	YML024W	0.0148725	Co-expression	Aceituno-Agosin-2012
YHL015W	YML073C	0.0123277	Co-expression	Aceituno-Agosin-2012
YHL015W	YNL069C	0.0136138	Co-expression	Aceituno-Agosin-2012
YHL015W	YOL121C	0.0137193	Co-expression	Aceituno-Agosin-2012
YHL015W	YOL127W	0.01005	Co-expression	Aceituno-Agosin-2012
YHL015W	YOR096W	0.0133764	Co-expression	Aceituno-Agosin-2012
YHL015W	YPL143W	0.0105328	Co-expression	Aceituno-Agosin-2012
YHL033C	YOL040C	0.0116677	Co-expression	Aceituno-Agosin-2012
YHR008C	YBL045C	0.0147831	Co-expression	Aceituno-Agosin-2012
YHR008C	YPR191W	0.0183892	Co-expression	Aceituno-Agosin-2012
YHR010W	YBL092W	0.0110644	Co-expression	Aceituno-Agosin-2012
YHR010W	YDL075W	0.0100454	Co-expression	Aceituno-Agosin-2012
YHR010W	YDR447C	0.0130683	Co-expression	Aceituno-Agosin-2012
YHR010W	YML024W	0.0119062	Co-expression	Aceituno-Agosin-2012
YHR010W	YNL302C	0.0134967	Co-expression	Aceituno-Agosin-2012
YHR010W	YOL121C	0.0110744	Co-expression	Aceituno-Agosin-2012
YHR010W	YOL127W	0.0101841	Co-expression	Aceituno-Agosin-2012
YHR010W	YOR293W	0.0129571	Co-expression	Aceituno-Agosin-2012
YHR010W	YOR369C	0.0137273	Co-expression	Aceituno-Agosin-2012
YHR010W	YPL143W	0.00963796	Co-expression	Aceituno-Agosin-2012
YHR019C	YOR063W	0.00639179	Co-expression	Aceituno-Agosin-2012
YHR020W	YDL229W	0.00831558	Co-expression	Aceituno-Agosin-2012
YHR020W	YER165W	0.00792915	Co-expression	Aceituno-Agosin-2012
YHR020W	YLR293C	0.00699689	Co-expression	Aceituno-Agosin-2012
YHR047C	YBR263W	0.0183802	Co-expression	Aceituno-Agosin-2012
YHR047C	YDR483W	0.0165756	Co-expression	Aceituno-Agosin-2012
YHR087W	YNR034W-A	0.013023	Co-expression	Aceituno-Agosin-2012
YHR128W	YBR189W	0.0135208	Co-expression	Aceituno-Agosin-2012
YHR128W	YBR191W	0.0151729	Co-expression	Aceituno-Agosin-2012
YHR128W	YGL076C	0.0141656	Co-expression	Aceituno-Agosin-2012
YHR128W	YJL177W	0.0151938	Co-expression	Aceituno-Agosin-2012
YHR128W	YKL180W	0.0150404	Co-expression	Aceituno-Agosin-2012
YHR128W	YLR061W	0.0146476	Co-expression	Aceituno-Agosin-2012
YHR128W	YNL069C	0.015285	Co-expression	Aceituno-Agosin-2012
YHR128W	YNL096C	0.0124917	Co-expression	Aceituno-Agosin-2012
YHR193C	YHL033C	0.0199324	Co-expression	Aceituno-Agosin-2012
YHR193C	YLR448W	0.0151616	Co-expression	Aceituno-Agosin-2012
YHR193C	YPL081W	0.0173367	Co-expression	Aceituno-Agosin-2012
YHR216W	YNL220W	0.0116431	Co-expression	Aceituno-Agosin-2012
YIL051C	YOL040C	0.0109974	Co-expression	Aceituno-Agosin-2012
YIL052C	YBL092W	0.0128694	Co-expression	Aceituno-Agosin-2012
YIL052C	YBR189W	0.0138611	Co-expression	Aceituno-Agosin-2012
YIL052C	YBR191W	0.0163147	Co-expression	Aceituno-Agosin-2012
YIL052C	YDL075W	0.0140778	Co-expression	Aceituno-Agosin-2012
YIL052C	YDR064W	0.0116119	Co-expression	Aceituno-Agosin-2012
YIL052C	YDR447C	0.0141427	Co-expression	Aceituno-Agosin-2012
YIL052C	YER056C-A	0.0121766	Co-expression	Aceituno-Agosin-2012
YIL052C	YHL001W	0.0150494	Co-expression	Aceituno-Agosin-2012
YIL052C	YHR010W	0.0105203	Co-expression	Aceituno-Agosin-2012
YIL052C	YJL136C	0.0138159	Co-expression	Aceituno-Agosin-2012
YIL052C	YLR333C	0.0143392	Co-expression	Aceituno-Agosin-2012
YIL052C	YLR441C	0.0100772	Co-expression	Aceituno-Agosin-2012
YIL052C	YML024W	0.0145746	Co-expression	Aceituno-Agosin-2012
YIL052C	YML073C	0.0128481	Co-expression	Aceituno-Agosin-2012
YIL052C	YNL069C	0.0162198	Co-expression	Aceituno-Agosin-2012
YIL052C	YOR096W	0.0117031	Co-expression	Aceituno-Agosin-2012
YIL052C	YPR102C	0.0119946	Co-expression	Aceituno-Agosin-2012
YIL053W	YKL152C	0.0108659	Co-expression	Aceituno-Agosin-2012
YIL053W	YKL180W	0.0137524	Co-expression	Aceituno-Agosin-2012
YIL053W	YLR448W	0.011582	Co-expression	Aceituno-Agosin-2012
YIL053W	YPR035W	0.0133784	Co-expression	Aceituno-Agosin-2012
YIL078W	YBR263W	0.0143488	Co-expression	Aceituno-Agosin-2012
YIL078W	YDR012W	0.0155811	Co-expression	Aceituno-Agosin-2012
YIL078W	YGL253W	0.0132608	Co-expression	Aceituno-Agosin-2012
YIL078W	YIL133C	0.0126508	Co-expression	Aceituno-Agosin-2012
YIL078W	YPL160W	0.0151262	Co-expression	Aceituno-Agosin-2012
YIL125W	YBR039W	0.0176271	Co-expression	Aceituno-Agosin-2012
YJL052W	YBR196C	0.017263	Co-expression	Aceituno-Agosin-2012
YJL130C	YDL185W	0.00989545	Co-expression	Aceituno-Agosin-2012
YJL130C	YER165W	0.0088884	Co-expression	Aceituno-Agosin-2012
YJL130C	YGR061C	0.00945727	Co-expression	Aceituno-Agosin-2012
YJL130C	YHR020W	0.00799946	Co-expression	Aceituno-Agosin-2012
YJL130C	YKL157W	0.0113543	Co-expression	Aceituno-Agosin-2012
YJL130C	YLR060W	0.00817456	Co-expression	Aceituno-Agosin-2012
YJL130C	YOR332W	0.00766715	Co-expression	Aceituno-Agosin-2012
YJL136C	YDL075W	0.014478	Co-expression	Aceituno-Agosin-2012
YJL136C	YDR064W	0.013076	Co-expression	Aceituno-Agosin-2012
YJL136C	YOR096W	0.0128245	Co-expression	Aceituno-Agosin-2012
YJL159W	YFL022C	0.00970132	Co-expression	Aceituno-Agosin-2012
YJL159W	YHR019C	0.00779035	Co-expression	Aceituno-Agosin-2012
YJL159W	YOR063W	0.0085702	Co-expression	Aceituno-Agosin-2012
YJL177W	YBR189W	0.0152716	Co-expression	Aceituno-Agosin-2012
YJL177W	YDL075W	0.0140233	Co-expression	Aceituno-Agosin-2012
YJL177W	YDR382W	0.0174259	Co-expression	Aceituno-Agosin-2012
YJL177W	YGL031C	0.0168403	Co-expression	Aceituno-Agosin-2012
YJL177W	YGL076C	0.0149454	Co-expression	Aceituno-Agosin-2012
YJL177W	YGR148C	0.0158273	Co-expression	Aceituno-Agosin-2012
YJL177W	YHL001W	0.0158791	Co-expression	Aceituno-Agosin-2012
YJL177W	YIL052C	0.0134035	Co-expression	Aceituno-Agosin-2012
YJL177W	YKL180W	0.0147307	Co-expression	Aceituno-Agosin-2012
YJL177W	YLR406C	0.0151743	Co-expression	Aceituno-Agosin-2012
YJL177W	YNL069C	0.0161	Co-expression	Aceituno-Agosin-2012
YJL190C	YBL092W	0.0120346	Co-expression	Aceituno-Agosin-2012
YJL190C	YDR447C	0.014136	Co-expression	Aceituno-Agosin-2012
YJL190C	YGL103W	0.0155996	Co-expression	Aceituno-Agosin-2012
YJL190C	YGR034W	0.0142786	Co-expression	Aceituno-Agosin-2012
YJL190C	YHR010W	0.0122768	Co-expression	Aceituno-Agosin-2012
YJL190C	YKL006W	0.0141167	Co-expression	Aceituno-Agosin-2012
YJL190C	YLR325C	0.0156594	Co-expression	Aceituno-Agosin-2012
YJL190C	YLR441C	0.0112859	Co-expression	Aceituno-Agosin-2012
YJL190C	YMR230W	0.0156978	Co-expression	Aceituno-Agosin-2012
YJL190C	YNL302C	0.0152855	Co-expression	Aceituno-Agosin-2012
YJL190C	YOL121C	0.0133353	Co-expression	Aceituno-Agosin-2012
YJL190C	YOL127W	0.0114708	Co-expression	Aceituno-Agosin-2012
YJL190C	YOR293W	0.0149459	Co-expression	Aceituno-Agosin-2012
YJL190C	YOR369C	0.0152785	Co-expression	Aceituno-Agosin-2012
YJL190C	YPL143W	0.0117677	Co-expression	Aceituno-Agosin-2012
YJL190C	YPR102C	0.0130329	Co-expression	Aceituno-Agosin-2012
YJR045C	YPL048W	0.013689	Co-expression	Aceituno-Agosin-2012
YKL006W	YBL092W	0.0127837	Co-expression	Aceituno-Agosin-2012
YKL006W	YBR191W	0.0142888	Co-expression	Aceituno-Agosin-2012
YKL006W	YDL075W	0.0118179	Co-expression	Aceituno-Agosin-2012
YKL006W	YGL103W	0.0157747	Co-expression	Aceituno-Agosin-2012
YKL006W	YGR034W	0.0138252	Co-expression	Aceituno-Agosin-2012
YKL006W	YHL001W	0.0156044	Co-expression	Aceituno-Agosin-2012
YKL006W	YHR010W	0.0120947	Co-expression	Aceituno-Agosin-2012
YKL006W	YLR441C	0.0112255	Co-expression	Aceituno-Agosin-2012
YKL006W	YMR230W	0.0158916	Co-expression	Aceituno-Agosin-2012
YKL006W	YNL302C	0.0157645	Co-expression	Aceituno-Agosin-2012
YKL006W	YOL121C	0.0136838	Co-expression	Aceituno-Agosin-2012
YKL006W	YOL127W	0.0114141	Co-expression	Aceituno-Agosin-2012
YKL006W	YOR293W	0.014667	Co-expression	Aceituno-Agosin-2012
YKL006W	YOR369C	0.0161829	Co-expression	Aceituno-Agosin-2012
YKL006W	YPL143W	0.0111791	Co-expression	Aceituno-Agosin-2012
YKL006W	YPR102C	0.0132303	Co-expression	Aceituno-Agosin-2012
YKL035W	YFR053C	0.0146298	Co-expression	Aceituno-Agosin-2012
YKL035W	YNR001C	0.0106227	Co-expression	Aceituno-Agosin-2012
YKL035W	YPR160W	0.0130561	Co-expression	Aceituno-Agosin-2012
YKL056C	YHL015W	0.0149497	Co-expression	Aceituno-Agosin-2012
YKL056C	YJL136C	0.0182821	Co-expression	Aceituno-Agosin-2012
YKL056C	YLR333C	0.0186393	Co-expression	Aceituno-Agosin-2012
YKL056C	YLR367W	0.0171374	Co-expression	Aceituno-Agosin-2012
YKL056C	YOR096W	0.0140866	Co-expression	Aceituno-Agosin-2012
YKL067W	YNR034W-A	0.00999147	Co-expression	Aceituno-Agosin-2012
YKL085W	YBL099W	0.0145365	Co-expression	Aceituno-Agosin-2012
YKL085W	YDR148C	0.0138432	Co-expression	Aceituno-Agosin-2012
YKL085W	YHR008C	0.0167535	Co-expression	Aceituno-Agosin-2012
YKL085W	YPR191W	0.0181403	Co-expression	Aceituno-Agosin-2012
YKL103C	YAL012W	0.0120559	Co-expression	Aceituno-Agosin-2012
YKL103C	YFL022C	0.00987086	Co-expression	Aceituno-Agosin-2012
YKL103C	YGR204W	0.0100617	Co-expression	Aceituno-Agosin-2012
YKL103C	YHR019C	0.00789712	Co-expression	Aceituno-Agosin-2012
YKL103C	YJL159W	0.0110719	Co-expression	Aceituno-Agosin-2012
YKL152C	YLR150W	0.00919912	Co-expression	Aceituno-Agosin-2012
YKL152C	YNL209W	0.0112844	Co-expression	Aceituno-Agosin-2012
YKL152C	YOL040C	0.00885883	Co-expression	Aceituno-Agosin-2012
YKL164C	YCR053W	0.00974785	Co-expression	Aceituno-Agosin-2012
YKL210W	YIL133C	0.0148372	Co-expression	Aceituno-Agosin-2012
YKL210W	YML056C	0.0127293	Co-expression	Aceituno-Agosin-2012
YKR057W	YJL136C	0.0219695	Co-expression	Aceituno-Agosin-2012
YKR057W	YLR333C	0.0193916	Co-expression	Aceituno-Agosin-2012
YKR057W	YLR388W	0.0204105	Co-expression	Aceituno-Agosin-2012
YLL024C	YDR127W	0.0112371	Co-expression	Aceituno-Agosin-2012
YLL024C	YER165W	0.0118097	Co-expression	Aceituno-Agosin-2012
YLL024C	YGL105W	0.00949221	Co-expression	Aceituno-Agosin-2012
YLL024C	YOL040C	0.0105036	Co-expression	Aceituno-Agosin-2012
YLL024C	YOR063W	0.0104854	Co-expression	Aceituno-Agosin-2012
YLL045C	YAL003W	0.0167911	Co-expression	Aceituno-Agosin-2012
YLL045C	YGL076C	0.0136239	Co-expression	Aceituno-Agosin-2012
YLL045C	YGR148C	0.0159517	Co-expression	Aceituno-Agosin-2012
YLL045C	YKR057W	0.0162285	Co-expression	Aceituno-Agosin-2012
YLL045C	YLR388W	0.0178241	Co-expression	Aceituno-Agosin-2012
YLL050C	YJR123W	0.0135691	Co-expression	Aceituno-Agosin-2012
YLL050C	YPL037C	0.0125219	Co-expression	Aceituno-Agosin-2012
YLR058C	YDL229W	0.00895435	Co-expression	Aceituno-Agosin-2012
YLR058C	YDR037W	0.00673549	Co-expression	Aceituno-Agosin-2012
YLR058C	YHR020W	0.00722036	Co-expression	Aceituno-Agosin-2012
YLR058C	YKL152C	0.00935729	Co-expression	Aceituno-Agosin-2012
YLR058C	YLR150W	0.00793295	Co-expression	Aceituno-Agosin-2012
YLR058C	YMR205C	0.00742725	Co-expression	Aceituno-Agosin-2012
YLR058C	YOL040C	0.0078623	Co-expression	Aceituno-Agosin-2012
YLR058C	YPR163C	0.00818565	Co-expression	Aceituno-Agosin-2012
YLR060W	YDL229W	0.00928663	Co-expression	Aceituno-Agosin-2012
YLR060W	YHR020W	0.00746794	Co-expression	Aceituno-Agosin-2012
YLR060W	YLR150W	0.00758629	Co-expression	Aceituno-Agosin-2012
YLR060W	YMR205C	0.00712976	Co-expression	Aceituno-Agosin-2012
YLR060W	YNL209W	0.0090551	Co-expression	Aceituno-Agosin-2012
YLR060W	YPR163C	0.00814537	Co-expression	Aceituno-Agosin-2012
YLR061W	YAL003W	0.0185532	Co-expression	Aceituno-Agosin-2012
YLR061W	YBL092W	0.0122274	Co-expression	Aceituno-Agosin-2012
YLR061W	YBR189W	0.0168295	Co-expression	Aceituno-Agosin-2012
YLR061W	YBR191W	0.017666	Co-expression	Aceituno-Agosin-2012
YLR061W	YDL075W	0.0136716	Co-expression	Aceituno-Agosin-2012
YLR061W	YDR064W	0.013758	Co-expression	Aceituno-Agosin-2012
YLR061W	YER056C-A	0.0154426	Co-expression	Aceituno-Agosin-2012
YLR061W	YFL034C-A	0.0142302	Co-expression	Aceituno-Agosin-2012
YLR061W	YGL031C	0.0159992	Co-expression	Aceituno-Agosin-2012
YLR061W	YGL076C	0.0165012	Co-expression	Aceituno-Agosin-2012
YLR061W	YGR148C	0.0179415	Co-expression	Aceituno-Agosin-2012
YLR061W	YIL052C	0.0159419	Co-expression	Aceituno-Agosin-2012
YLR061W	YJL177W	0.0169918	Co-expression	Aceituno-Agosin-2012
YLR061W	YLR388W	0.0165287	Co-expression	Aceituno-Agosin-2012
YLR061W	YLR406C	0.0145422	Co-expression	Aceituno-Agosin-2012
YLR061W	YML073C	0.0158437	Co-expression	Aceituno-Agosin-2012
YLR061W	YNL069C	0.0183035	Co-expression	Aceituno-Agosin-2012
YLR061W	YNL096C	0.0131432	Co-expression	Aceituno-Agosin-2012
YLR061W	YPL079W	0.0143994	Co-expression	Aceituno-Agosin-2012
YLR075W	YBR189W	0.0123725	Co-expression	Aceituno-Agosin-2012
YLR075W	YBR191W	0.0132335	Co-expression	Aceituno-Agosin-2012
YLR075W	YER056C-A	0.0112383	Co-expression	Aceituno-Agosin-2012
YLR075W	YGL103W	0.0129959	Co-expression	Aceituno-Agosin-2012
YLR075W	YGL123W	0.0143057	Co-expression	Aceituno-Agosin-2012
YLR075W	YGR027C	0.0102385	Co-expression	Aceituno-Agosin-2012
YLR075W	YHL015W	0.0132049	Co-expression	Aceituno-Agosin-2012
YLR075W	YKL006W	0.0114358	Co-expression	Aceituno-Agosin-2012
YLR075W	YLR441C	0.0101281	Co-expression	Aceituno-Agosin-2012
YLR075W	YML024W	0.0125922	Co-expression	Aceituno-Agosin-2012
YLR075W	YML063W	0.00918436	Co-expression	Aceituno-Agosin-2012
YLR075W	YML073C	0.0117624	Co-expression	Aceituno-Agosin-2012
YLR075W	YNL178W	0.0136399	Co-expression	Aceituno-Agosin-2012
YLR075W	YOL127W	0.010038	Co-expression	Aceituno-Agosin-2012
YLR075W	YOR096W	0.0110669	Co-expression	Aceituno-Agosin-2012
YLR075W	YPL143W	0.0104427	Co-expression	Aceituno-Agosin-2012
YLR150W	YOL040C	0.00819909	Co-expression	Aceituno-Agosin-2012
YLR192C	YAL012W	0.00915917	Co-expression	Aceituno-Agosin-2012
YLR192C	YCR053W	0.00738467	Co-expression	Aceituno-Agosin-2012
YLR192C	YCR088W	0.010387	Co-expression	Aceituno-Agosin-2012
YLR192C	YDL014W	0.00691027	Co-expression	Aceituno-Agosin-2012
YLR192C	YFL022C	0.00785767	Co-expression	Aceituno-Agosin-2012
YLR192C	YHR019C	0.00633934	Co-expression	Aceituno-Agosin-2012
YLR192C	YJL159W	0.00854584	Co-expression	Aceituno-Agosin-2012
YLR192C	YKL164C	0.00864244	Co-expression	Aceituno-Agosin-2012
YLR259C	YDL229W	0.0109336	Co-expression	Aceituno-Agosin-2012
YLR259C	YFL018C	0.0134072	Co-expression	Aceituno-Agosin-2012
YLR259C	YIL051C	0.0151011	Co-expression	Aceituno-Agosin-2012
YLR259C	YKL085W	0.0149432	Co-expression	Aceituno-Agosin-2012
YLR259C	YPR191W	0.0153236	Co-expression	Aceituno-Agosin-2012
YLR293C	YDR037W	0.00624261	Co-expression	Aceituno-Agosin-2012
YLR293C	YER165W	0.00832272	Co-expression	Aceituno-Agosin-2012
YLR293C	YHL033C	0.0120627	Co-expression	Aceituno-Agosin-2012
YLR293C	YLR150W	0.00781986	Co-expression	Aceituno-Agosin-2012
YLR293C	YLR448W	0.00946451	Co-expression	Aceituno-Agosin-2012
YLR293C	YOL040C	0.00764082	Co-expression	Aceituno-Agosin-2012
YLR325C	YBL092W	0.0134309	Co-expression	Aceituno-Agosin-2012
YLR325C	YDR447C	0.0159537	Co-expression	Aceituno-Agosin-2012
YLR325C	YGL103W	0.0157651	Co-expression	Aceituno-Agosin-2012
YLR325C	YGR034W	0.0151261	Co-expression	Aceituno-Agosin-2012
YLR325C	YHR010W	0.0138848	Co-expression	Aceituno-Agosin-2012
YLR325C	YKL006W	0.0148519	Co-expression	Aceituno-Agosin-2012
YLR325C	YLR441C	0.0120578	Co-expression	Aceituno-Agosin-2012
YLR325C	YMR230W	0.0179715	Co-expression	Aceituno-Agosin-2012
YLR325C	YNL302C	0.0162394	Co-expression	Aceituno-Agosin-2012
YLR325C	YOL127W	0.0122182	Co-expression	Aceituno-Agosin-2012
YLR325C	YOR293W	0.0171353	Co-expression	Aceituno-Agosin-2012
YLR325C	YOR369C	0.0167939	Co-expression	Aceituno-Agosin-2012
YLR325C	YPL143W	0.0122876	Co-expression	Aceituno-Agosin-2012
YLR325C	YPR102C	0.0147041	Co-expression	Aceituno-Agosin-2012
YLR333C	YDL075W	0.0136867	Co-expression	Aceituno-Agosin-2012
YLR333C	YDR064W	0.0148886	Co-expression	Aceituno-Agosin-2012
YLR333C	YER056C-A	0.014111	Co-expression	Aceituno-Agosin-2012
YLR333C	YHL015W	0.0140958	Co-expression	Aceituno-Agosin-2012
YLR333C	YJL136C	0.0203092	Co-expression	Aceituno-Agosin-2012
YLR333C	YML024W	0.017471	Co-expression	Aceituno-Agosin-2012
YLR333C	YOR096W	0.0154381	Co-expression	Aceituno-Agosin-2012
YLR335W	YGR204W	0.00841916	Co-expression	Aceituno-Agosin-2012
YLR344W	YBL092W	0.0112534	Co-expression	Aceituno-Agosin-2012
YLR344W	YBR191W	0.0125847	Co-expression	Aceituno-Agosin-2012
YLR344W	YDL075W	0.0102515	Co-expression	Aceituno-Agosin-2012
YLR344W	YDR447C	0.0122491	Co-expression	Aceituno-Agosin-2012
YLR344W	YFL034C-A	0.0107402	Co-expression	Aceituno-Agosin-2012
YLR344W	YGL103W	0.0112052	Co-expression	Aceituno-Agosin-2012
YLR344W	YGR027C	0.00950954	Co-expression	Aceituno-Agosin-2012
YLR344W	YGR034W	0.0119081	Co-expression	Aceituno-Agosin-2012
YLR344W	YGR085C	0.0141223	Co-expression	Aceituno-Agosin-2012
YLR344W	YHL001W	0.0115523	Co-expression	Aceituno-Agosin-2012
YLR344W	YHR010W	0.0101321	Co-expression	Aceituno-Agosin-2012
YLR344W	YIL052C	0.0106256	Co-expression	Aceituno-Agosin-2012
YLR344W	YJL190C	0.0115372	Co-expression	Aceituno-Agosin-2012
YLR344W	YKL006W	0.0114809	Co-expression	Aceituno-Agosin-2012
YLR344W	YLR325C	0.0128098	Co-expression	Aceituno-Agosin-2012
YLR344W	YLR441C	0.00973082	Co-expression	Aceituno-Agosin-2012
YLR344W	YML024W	0.0116592	Co-expression	Aceituno-Agosin-2012
YLR344W	YML063W	0.00855463	Co-expression	Aceituno-Agosin-2012
YLR344W	YML073C	0.0108729	Co-expression	Aceituno-Agosin-2012
YLR344W	YMR230W	0.0131429	Co-expression	Aceituno-Agosin-2012
YLR344W	YNL302C	0.0124017	Co-expression	Aceituno-Agosin-2012
YLR344W	YOL121C	0.0114839	Co-expression	Aceituno-Agosin-2012
YLR344W	YOL127W	0.00880208	Co-expression	Aceituno-Agosin-2012
YLR344W	YOR293W	0.0123125	Co-expression	Aceituno-Agosin-2012
YLR344W	YPL143W	0.00911671	Co-expression	Aceituno-Agosin-2012
YLR344W	YPR102C	0.0107781	Co-expression	Aceituno-Agosin-2012
YLR367W	YGL031C	0.0157277	Co-expression	Aceituno-Agosin-2012
YLR367W	YGR148C	0.0139171	Co-expression	Aceituno-Agosin-2012
YLR367W	YJL136C	0.015974	Co-expression	Aceituno-Agosin-2012
YLR367W	YKR057W	0.0163782	Co-expression	Aceituno-Agosin-2012
YLR367W	YLR333C	0.0152387	Co-expression	Aceituno-Agosin-2012
YLR367W	YLR406C	0.013909	Co-expression	Aceituno-Agosin-2012
YLR367W	YNL067W	0.0152543	Co-expression	Aceituno-Agosin-2012
YLR367W	YOL039W	0.0145187	Co-expression	Aceituno-Agosin-2012
YLR388W	YDR064W	0.0138068	Co-expression	Aceituno-Agosin-2012
YLR388W	YER056C-A	0.0132067	Co-expression	Aceituno-Agosin-2012
YLR388W	YJL136C	0.0195002	Co-expression	Aceituno-Agosin-2012
YLR388W	YJR123W	0.0170098	Co-expression	Aceituno-Agosin-2012
YLR388W	YLR333C	0.0190987	Co-expression	Aceituno-Agosin-2012
YLR406C	YBR189W	0.0156724	Co-expression	Aceituno-Agosin-2012
YLR406C	YBR191W	0.0157408	Co-expression	Aceituno-Agosin-2012
YLR406C	YDL075W	0.0145102	Co-expression	Aceituno-Agosin-2012
YLR406C	YER056C-A	0.0125664	Co-expression	Aceituno-Agosin-2012
YLR406C	YGL076C	0.0132615	Co-expression	Aceituno-Agosin-2012
YLR406C	YHL001W	0.0170167	Co-expression	Aceituno-Agosin-2012
YLR406C	YHL015W	0.0132458	Co-expression	Aceituno-Agosin-2012
YLR406C	YJL136C	0.0154655	Co-expression	Aceituno-Agosin-2012
YLR406C	YLR441C	0.0109452	Co-expression	Aceituno-Agosin-2012
YLR406C	YML073C	0.0126568	Co-expression	Aceituno-Agosin-2012
YLR406C	YOL121C	0.0154942	Co-expression	Aceituno-Agosin-2012
YLR441C	YBL092W	0.0105122	Co-expression	Aceituno-Agosin-2012
YLR441C	YBR189W	0.0110162	Co-expression	Aceituno-Agosin-2012
YLR441C	YBR191W	0.0127005	Co-expression	Aceituno-Agosin-2012
YLR441C	YDL075W	0.0104106	Co-expression	Aceituno-Agosin-2012
YLR441C	YDR447C	0.0121141	Co-expression	Aceituno-Agosin-2012
YLR441C	YGL103W	0.0117606	Co-expression	Aceituno-Agosin-2012
YLR441C	YGR034W	0.010882	Co-expression	Aceituno-Agosin-2012
YLR441C	YHL001W	0.0121678	Co-expression	Aceituno-Agosin-2012
YLR441C	YHL015W	0.0112197	Co-expression	Aceituno-Agosin-2012
YLR441C	YHR010W	0.00991311	Co-expression	Aceituno-Agosin-2012
YLR441C	YML024W	0.0115899	Co-expression	Aceituno-Agosin-2012
YLR441C	YML073C	0.0105831	Co-expression	Aceituno-Agosin-2012
YLR441C	YMR230W	0.0123231	Co-expression	Aceituno-Agosin-2012
YLR441C	YNL069C	0.0110517	Co-expression	Aceituno-Agosin-2012
YLR441C	YNL302C	0.0124812	Co-expression	Aceituno-Agosin-2012
YLR441C	YOL121C	0.0122709	Co-expression	Aceituno-Agosin-2012
YLR441C	YOL127W	0.00931038	Co-expression	Aceituno-Agosin-2012
YLR441C	YOR096W	0.0101363	Co-expression	Aceituno-Agosin-2012
YLR441C	YOR293W	0.0115352	Co-expression	Aceituno-Agosin-2012
YLR441C	YOR369C	0.0126496	Co-expression	Aceituno-Agosin-2012
YLR441C	YPL143W	0.009375	Co-expression	Aceituno-Agosin-2012
YLR441C	YPR102C	0.010765	Co-expression	Aceituno-Agosin-2012
YLR448W	YHL033C	0.017274	Co-expression	Aceituno-Agosin-2012
YML024W	YBR191W	0.016685	Co-expression	Aceituno-Agosin-2012
YML024W	YER056C-A	0.0144097	Co-expression	Aceituno-Agosin-2012
YML024W	YOR096W	0.0156044	Co-expression	Aceituno-Agosin-2012
YML056C	YAR015W	0.0114883	Co-expression	Aceituno-Agosin-2012
YML056C	YHL033C	0.0143326	Co-expression	Aceituno-Agosin-2012
YML056C	YHR193C	0.012063	Co-expression	Aceituno-Agosin-2012
YML056C	YIL133C	0.0115004	Co-expression	Aceituno-Agosin-2012
YML056C	YKL180W	0.0120458	Co-expression	Aceituno-Agosin-2012
YML056C	YLR448W	0.0112876	Co-expression	Aceituno-Agosin-2012
YML063W	YBL092W	0.00961806	Co-expression	Aceituno-Agosin-2012
YML063W	YBR189W	0.0105797	Co-expression	Aceituno-Agosin-2012
YML063W	YBR191W	0.012464	Co-expression	Aceituno-Agosin-2012
YML063W	YDL075W	0.00943698	Co-expression	Aceituno-Agosin-2012
YML063W	YDR064W	0.00927062	Co-expression	Aceituno-Agosin-2012
YML063W	YDR447C	0.0124023	Co-expression	Aceituno-Agosin-2012
YML063W	YER056C-A	0.00973911	Co-expression	Aceituno-Agosin-2012
YML063W	YGR034W	0.00979811	Co-expression	Aceituno-Agosin-2012
YML063W	YHL015W	0.0103221	Co-expression	Aceituno-Agosin-2012
YML063W	YHR010W	0.00882292	Co-expression	Aceituno-Agosin-2012
YML063W	YIL052C	0.010372	Co-expression	Aceituno-Agosin-2012
YML063W	YJL190C	0.00968224	Co-expression	Aceituno-Agosin-2012
YML063W	YKL006W	0.00960225	Co-expression	Aceituno-Agosin-2012
YML063W	YLR325C	0.00994822	Co-expression	Aceituno-Agosin-2012
YML063W	YLR441C	0.00873963	Co-expression	Aceituno-Agosin-2012
YML063W	YML024W	0.0120786	Co-expression	Aceituno-Agosin-2012
YML063W	YML073C	0.0101816	Co-expression	Aceituno-Agosin-2012
YML063W	YNL069C	0.0118729	Co-expression	Aceituno-Agosin-2012
YML063W	YNL302C	0.0118431	Co-expression	Aceituno-Agosin-2012
YML063W	YOL121C	0.0101775	Co-expression	Aceituno-Agosin-2012
YML063W	YOL127W	0.00842543	Co-expression	Aceituno-Agosin-2012
YML063W	YOR096W	0.00997817	Co-expression	Aceituno-Agosin-2012
YML063W	YOR369C	0.0105452	Co-expression	Aceituno-Agosin-2012
YML063W	YPL143W	0.00814618	Co-expression	Aceituno-Agosin-2012
YML063W	YPR102C	0.00985323	Co-expression	Aceituno-Agosin-2012
YML073C	YBL092W	0.0125489	Co-expression	Aceituno-Agosin-2012
YML073C	YBR191W	0.0161865	Co-expression	Aceituno-Agosin-2012
YML073C	YDR064W	0.0117634	Co-expression	Aceituno-Agosin-2012
YML073C	YER056C-A	0.0136084	Co-expression	Aceituno-Agosin-2012
YML073C	YHL001W	0.01481	Co-expression	Aceituno-Agosin-2012
YML073C	YML024W	0.0140859	Co-expression	Aceituno-Agosin-2012
YML073C	YNL069C	0.0153054	Co-expression	Aceituno-Agosin-2012
YML073C	YOR096W	0.0116902	Co-expression	Aceituno-Agosin-2012
YML078W	YOL143C	0.0119405	Co-expression	Aceituno-Agosin-2012
YMR027W	YBR127C	0.0111726	Co-expression	Aceituno-Agosin-2012
YMR027W	YGR240C	0.0100852	Co-expression	Aceituno-Agosin-2012
YMR027W	YKL157W	0.0140742	Co-expression	Aceituno-Agosin-2012
YMR072W	YBR196C	0.014666	Co-expression	Aceituno-Agosin-2012
YMR105C	YDL110C	0.0138663	Co-expression	Aceituno-Agosin-2012
YMR105C	YDR513W	0.0118254	Co-expression	Aceituno-Agosin-2012
YMR105C	YDR516C	0.0175386	Co-expression	Aceituno-Agosin-2012
YMR105C	YEL011W	0.0147617	Co-expression	Aceituno-Agosin-2012
YMR105C	YHR087W	0.0116197	Co-expression	Aceituno-Agosin-2012
YMR105C	YNR034W-A	0.0143661	Co-expression	Aceituno-Agosin-2012
YMR105C	YPR160W	0.0139618	Co-expression	Aceituno-Agosin-2012
YMR108W	YKL152C	0.00945752	Co-expression	Aceituno-Agosin-2012
YMR108W	YNL209W	0.00973499	Co-expression	Aceituno-Agosin-2012
YMR108W	YOL086C	0.0108745	Co-expression	Aceituno-Agosin-2012
YMR116C	YNL178W	0.0166422	Co-expression	Aceituno-Agosin-2012
YMR120C	YDR012W	0.0168917	Co-expression	Aceituno-Agosin-2012
YMR120C	YLR359W	0.0156884	Co-expression	Aceituno-Agosin-2012
YMR205C	YKL152C	0.00848898	Co-expression	Aceituno-Agosin-2012
YMR205C	YLR150W	0.0074913	Co-expression	Aceituno-Agosin-2012
YMR205C	YNL209W	0.00850086	Co-expression	Aceituno-Agosin-2012
YMR230W	YBL092W	0.0134788	Co-expression	Aceituno-Agosin-2012
YMR230W	YGL103W	0.0158846	Co-expression	Aceituno-Agosin-2012
YMR230W	YGR034W	0.0161437	Co-expression	Aceituno-Agosin-2012
YMR230W	YHL001W	0.0161728	Co-expression	Aceituno-Agosin-2012
YMR230W	YHR010W	0.0135252	Co-expression	Aceituno-Agosin-2012
YMR230W	YNL302C	0.0159028	Co-expression	Aceituno-Agosin-2012
YMR230W	YOL121C	0.0147026	Co-expression	Aceituno-Agosin-2012
YMR230W	YOL127W	0.0118465	Co-expression	Aceituno-Agosin-2012
YMR230W	YOR293W	0.0175387	Co-expression	Aceituno-Agosin-2012
YMR230W	YOR369C	0.0178858	Co-expression	Aceituno-Agosin-2012
YMR230W	YPL143W	0.0113614	Co-expression	Aceituno-Agosin-2012
YMR230W	YPR102C	0.0145866	Co-expression	Aceituno-Agosin-2012
YNL007C	YKL164C	0.013063	Co-expression	Aceituno-Agosin-2012
YNL016W	YBR127C	0.0116869	Co-expression	Aceituno-Agosin-2012
YNL016W	YBR221C	0.0128706	Co-expression	Aceituno-Agosin-2012
YNL016W	YER043C	0.0191302	Co-expression	Aceituno-Agosin-2012
YNL016W	YPL262W	0.0156767	Co-expression	Aceituno-Agosin-2012
YNL064C	YCR053W	0.0074643	Co-expression	Aceituno-Agosin-2012
YNL064C	YDR037W	0.00583181	Co-expression	Aceituno-Agosin-2012
YNL064C	YFL022C	0.0075933	Co-expression	Aceituno-Agosin-2012
YNL064C	YKL164C	0.00874735	Co-expression	Aceituno-Agosin-2012
YNL064C	YLR150W	0.00717391	Co-expression	Aceituno-Agosin-2012
YNL064C	YLR192C	0.00682832	Co-expression	Aceituno-Agosin-2012
YNL064C	YLR293C	0.00711186	Co-expression	Aceituno-Agosin-2012
YNL067W	YDR064W	0.0146355	Co-expression	Aceituno-Agosin-2012
YNL067W	YER056C-A	0.0145106	Co-expression	Aceituno-Agosin-2012
YNL067W	YHL015W	0.0149249	Co-expression	Aceituno-Agosin-2012
YNL067W	YLR333C	0.018398	Co-expression	Aceituno-Agosin-2012
YNL067W	YLR406C	0.0152364	Co-expression	Aceituno-Agosin-2012
YNL067W	YML063W	0.0110298	Co-expression	Aceituno-Agosin-2012
YNL067W	YOR096W	0.0145976	Co-expression	Aceituno-Agosin-2012
YNL069C	YBL092W	0.0133786	Co-expression	Aceituno-Agosin-2012
YNL069C	YBR191W	0.019322	Co-expression	Aceituno-Agosin-2012
YNL069C	YDL075W	0.0150383	Co-expression	Aceituno-Agosin-2012
YNL069C	YER056C-A	0.0143392	Co-expression	Aceituno-Agosin-2012
YNL069C	YHL001W	0.0169358	Co-expression	Aceituno-Agosin-2012
YNL069C	YOR096W	0.0129968	Co-expression	Aceituno-Agosin-2012
YNL071W	YAL012W	0.0110689	Co-expression	Aceituno-Agosin-2012
YNL071W	YBR011C	0.00802062	Co-expression	Aceituno-Agosin-2012
YNL071W	YER165W	0.00985051	Co-expression	Aceituno-Agosin-2012
YNL071W	YLR150W	0.00892719	Co-expression	Aceituno-Agosin-2012
YNL071W	YLR192C	0.00827089	Co-expression	Aceituno-Agosin-2012
YNL096C	YBL092W	0.0116899	Co-expression	Aceituno-Agosin-2012
YNL096C	YFL034C-A	0.0118814	Co-expression	Aceituno-Agosin-2012
YNL096C	YGR027C	0.0104898	Co-expression	Aceituno-Agosin-2012
YNL096C	YGR034W	0.0125214	Co-expression	Aceituno-Agosin-2012
YNL096C	YKL006W	0.0120008	Co-expression	Aceituno-Agosin-2012
YNL096C	YKL180W	0.0136188	Co-expression	Aceituno-Agosin-2012
YNL096C	YLR344W	0.0113326	Co-expression	Aceituno-Agosin-2012
YNL096C	YLR441C	0.00980208	Co-expression	Aceituno-Agosin-2012
YNL096C	YML073C	0.0134271	Co-expression	Aceituno-Agosin-2012
YNL096C	YNL069C	0.0133334	Co-expression	Aceituno-Agosin-2012
YNL178W	YGL030W	0.0181509	Co-expression	Aceituno-Agosin-2012
YNL178W	YGL123W	0.0184167	Co-expression	Aceituno-Agosin-2012
YNL178W	YHL015W	0.0147877	Co-expression	Aceituno-Agosin-2012
YNL178W	YPL143W	0.0128682	Co-expression	Aceituno-Agosin-2012
YNL302C	YBR191W	0.016291	Co-expression	Aceituno-Agosin-2012
YNL302C	YOL121C	0.0148451	Co-expression	Aceituno-Agosin-2012
YNL302C	YPL143W	0.0123238	Co-expression	Aceituno-Agosin-2012
YOL039W	YGL031C	0.014287	Co-expression	Aceituno-Agosin-2012
YOL039W	YGR148C	0.0154521	Co-expression	Aceituno-Agosin-2012
YOL039W	YJL136C	0.016139	Co-expression	Aceituno-Agosin-2012
YOL039W	YKR057W	0.0167584	Co-expression	Aceituno-Agosin-2012
YOL039W	YLR388W	0.0161574	Co-expression	Aceituno-Agosin-2012
YOL086C	YKL152C	0.0112707	Co-expression	Aceituno-Agosin-2012
YOL121C	YDL075W	0.0136966	Co-expression	Aceituno-Agosin-2012
YOL127W	YBL092W	0.00996735	Co-expression	Aceituno-Agosin-2012
YOL127W	YDR447C	0.0120171	Co-expression	Aceituno-Agosin-2012
YOL127W	YNL302C	0.0126812	Co-expression	Aceituno-Agosin-2012
YOL127W	YOR293W	0.0115604	Co-expression	Aceituno-Agosin-2012
YOL127W	YPL143W	0.00933835	Co-expression	Aceituno-Agosin-2012
YOR096W	YBR191W	0.014045	Co-expression	Aceituno-Agosin-2012
YOR096W	YDL075W	0.0111958	Co-expression	Aceituno-Agosin-2012
YOR096W	YER056C-A	0.0126229	Co-expression	Aceituno-Agosin-2012
YOR136W	YNR001C	0.00971916	Co-expression	Aceituno-Agosin-2012
YOR136W	YPR160W	0.0111277	Co-expression	Aceituno-Agosin-2012
YOR142W	YER091C	0.0110096	Co-expression	Aceituno-Agosin-2012
YOR142W	YGR155W	0.0100169	Co-expression	Aceituno-Agosin-2012
YOR185C	YAL060W	0.01718	Co-expression	Aceituno-Agosin-2012
YOR185C	YOR136W	0.0133071	Co-expression	Aceituno-Agosin-2012
YOR187W	YDR483W	0.0133976	Co-expression	Aceituno-Agosin-2012
YOR234C	YBL092W	0.0107941	Co-expression	Aceituno-Agosin-2012
YOR234C	YDL075W	0.0102062	Co-expression	Aceituno-Agosin-2012
YOR234C	YDR447C	0.0128273	Co-expression	Aceituno-Agosin-2012
YOR234C	YFL034C-A	0.010063	Co-expression	Aceituno-Agosin-2012
YOR234C	YGL103W	0.0118491	Co-expression	Aceituno-Agosin-2012
YOR234C	YGR027C	0.00965819	Co-expression	Aceituno-Agosin-2012
YOR234C	YGR034W	0.0125953	Co-expression	Aceituno-Agosin-2012
YOR234C	YGR085C	0.0143214	Co-expression	Aceituno-Agosin-2012
YOR234C	YHL001W	0.0116693	Co-expression	Aceituno-Agosin-2012
YOR234C	YHR010W	0.0107003	Co-expression	Aceituno-Agosin-2012
YOR234C	YIL052C	0.0106398	Co-expression	Aceituno-Agosin-2012
YOR234C	YJL190C	0.0121692	Co-expression	Aceituno-Agosin-2012
YOR234C	YKL006W	0.0117891	Co-expression	Aceituno-Agosin-2012
YOR234C	YLR325C	0.0132972	Co-expression	Aceituno-Agosin-2012
YOR234C	YLR344W	0.0103226	Co-expression	Aceituno-Agosin-2012
YOR234C	YLR441C	0.00990757	Co-expression	Aceituno-Agosin-2012
YOR234C	YML024W	0.0114836	Co-expression	Aceituno-Agosin-2012
YOR234C	YML063W	0.00878414	Co-expression	Aceituno-Agosin-2012
YOR234C	YML073C	0.0104727	Co-expression	Aceituno-Agosin-2012
YOR234C	YMR230W	0.0136044	Co-expression	Aceituno-Agosin-2012
YOR234C	YNL096C	0.010854	Co-expression	Aceituno-Agosin-2012
YOR234C	YNL302C	0.013061	Co-expression	Aceituno-Agosin-2012
YOR234C	YOL121C	0.0112971	Co-expression	Aceituno-Agosin-2012
YOR234C	YOL127W	0.0098718	Co-expression	Aceituno-Agosin-2012
YOR234C	YOR293W	0.0128974	Co-expression	Aceituno-Agosin-2012
YOR234C	YOR369C	0.0129144	Co-expression	Aceituno-Agosin-2012
YOR234C	YPL143W	0.00951943	Co-expression	Aceituno-Agosin-2012
YOR234C	YPR102C	0.0114973	Co-expression	Aceituno-Agosin-2012
YOR293W	YNL302C	0.0160378	Co-expression	Aceituno-Agosin-2012
YOR293W	YPL143W	0.0115821	Co-expression	Aceituno-Agosin-2012
YOR332W	YDL185W	0.00845983	Co-expression	Aceituno-Agosin-2012
YOR332W	YER165W	0.00792912	Co-expression	Aceituno-Agosin-2012
YOR332W	YLR150W	0.00730423	Co-expression	Aceituno-Agosin-2012
YOR332W	YMR205C	0.00682674	Co-expression	Aceituno-Agosin-2012
YOR332W	YOL040C	0.00731305	Co-expression	Aceituno-Agosin-2012
YOR332W	YPR163C	0.0074809	Co-expression	Aceituno-Agosin-2012
YOR369C	YBL092W	0.0128507	Co-expression	Aceituno-Agosin-2012
YOR369C	YDL075W	0.0138185	Co-expression	Aceituno-Agosin-2012
YOR369C	YHL001W	0.0172269	Co-expression	Aceituno-Agosin-2012
YOR369C	YNL302C	0.0180627	Co-expression	Aceituno-Agosin-2012
YOR369C	YOL121C	0.0152904	Co-expression	Aceituno-Agosin-2012
YOR369C	YOL127W	0.0132554	Co-expression	Aceituno-Agosin-2012
YOR369C	YOR293W	0.0162582	Co-expression	Aceituno-Agosin-2012
YOR369C	YPL143W	0.0115239	Co-expression	Aceituno-Agosin-2012
YPL037C	YAL003W	0.0135285	Co-expression	Aceituno-Agosin-2012
YPL037C	YDR064W	0.0116472	Co-expression	Aceituno-Agosin-2012
YPL037C	YER056C-A	0.0113151	Co-expression	Aceituno-Agosin-2012
YPL037C	YJR123W	0.0140335	Co-expression	Aceituno-Agosin-2012
YPL037C	YLR333C	0.0135855	Co-expression	Aceituno-Agosin-2012
YPL037C	YLR388W	0.0134259	Co-expression	Aceituno-Agosin-2012
YPL037C	YNL067W	0.0133859	Co-expression	Aceituno-Agosin-2012
YPL037C	YOR096W	0.0106358	Co-expression	Aceituno-Agosin-2012
YPL048W	YDL014W	0.00824144	Co-expression	Aceituno-Agosin-2012
YPL079W	YBL092W	0.0123086	Co-expression	Aceituno-Agosin-2012
YPL079W	YBR189W	0.0157334	Co-expression	Aceituno-Agosin-2012
YPL079W	YBR191W	0.0168234	Co-expression	Aceituno-Agosin-2012
YPL079W	YDL075W	0.0131181	Co-expression	Aceituno-Agosin-2012
YPL079W	YDR064W	0.0127696	Co-expression	Aceituno-Agosin-2012
YPL079W	YDR447C	0.0140608	Co-expression	Aceituno-Agosin-2012
YPL079W	YER056C-A	0.0134406	Co-expression	Aceituno-Agosin-2012
YPL079W	YFL034C-A	0.0116505	Co-expression	Aceituno-Agosin-2012
YPL079W	YGL031C	0.0146586	Co-expression	Aceituno-Agosin-2012
YPL079W	YGL076C	0.0118577	Co-expression	Aceituno-Agosin-2012
YPL079W	YGR148C	0.0131493	Co-expression	Aceituno-Agosin-2012
YPL079W	YHL001W	0.0152756	Co-expression	Aceituno-Agosin-2012
YPL079W	YHL015W	0.0142482	Co-expression	Aceituno-Agosin-2012
YPL079W	YIL052C	0.0131287	Co-expression	Aceituno-Agosin-2012
YPL079W	YLR075W	0.0123775	Co-expression	Aceituno-Agosin-2012
YPL079W	YLR344W	0.0103191	Co-expression	Aceituno-Agosin-2012
YPL079W	YLR406C	0.0136097	Co-expression	Aceituno-Agosin-2012
YPL079W	YLR441C	0.0110934	Co-expression	Aceituno-Agosin-2012
YPL079W	YML024W	0.0148557	Co-expression	Aceituno-Agosin-2012
YPL079W	YML063W	0.0107499	Co-expression	Aceituno-Agosin-2012
YPL079W	YML073C	0.0139035	Co-expression	Aceituno-Agosin-2012
YPL079W	YNL069C	0.0160934	Co-expression	Aceituno-Agosin-2012
YPL079W	YNL302C	0.0137032	Co-expression	Aceituno-Agosin-2012
YPL079W	YOL121C	0.0136981	Co-expression	Aceituno-Agosin-2012
YPL079W	YOL127W	0.0100586	Co-expression	Aceituno-Agosin-2012
YPL079W	YOR096W	0.0130998	Co-expression	Aceituno-Agosin-2012
YPL081W	YHL033C	0.019215	Co-expression	Aceituno-Agosin-2012
YPL081W	YLR448W	0.0135491	Co-expression	Aceituno-Agosin-2012
YPL106C	YAL012W	0.00991493	Co-expression	Aceituno-Agosin-2012
YPL106C	YBR011C	0.00744395	Co-expression	Aceituno-Agosin-2012
YPL106C	YNL071W	0.00898773	Co-expression	Aceituno-Agosin-2012
YPL106C	YOR332W	0.0075433	Co-expression	Aceituno-Agosin-2012
YPL143W	YOL121C	0.0111098	Co-expression	Aceituno-Agosin-2012
YPL160W	YIL133C	0.0158811	Co-expression	Aceituno-Agosin-2012
YPL160W	YML056C	0.0133379	Co-expression	Aceituno-Agosin-2012
YPL262W	YBL099W	0.0145581	Co-expression	Aceituno-Agosin-2012
YPL262W	YBR221C	0.01402	Co-expression	Aceituno-Agosin-2012
YPL262W	YER043C	0.0175039	Co-expression	Aceituno-Agosin-2012
YPR041W	YFL045C	0.0179155	Co-expression	Aceituno-Agosin-2012
YPR041W	YGR034W	0.0142029	Co-expression	Aceituno-Agosin-2012
YPR041W	YHR128W	0.0145077	Co-expression	Aceituno-Agosin-2012
YPR041W	YNL096C	0.0152809	Co-expression	Aceituno-Agosin-2012
YPR041W	YOL121C	0.0151833	Co-expression	Aceituno-Agosin-2012
YPR052C	YAR015W	0.0153335	Co-expression	Aceituno-Agosin-2012
YPR052C	YDR012W	0.0172638	Co-expression	Aceituno-Agosin-2012
YPR052C	YIL078W	0.0156391	Co-expression	Aceituno-Agosin-2012
YPR052C	YIL133C	0.0167058	Co-expression	Aceituno-Agosin-2012
YPR052C	YPL160W	0.0187948	Co-expression	Aceituno-Agosin-2012
YPR060C	YNL220W	0.0115626	Co-expression	Aceituno-Agosin-2012
YPR102C	YBL092W	0.0116344	Co-expression	Aceituno-Agosin-2012
YPR102C	YDL075W	0.0116704	Co-expression	Aceituno-Agosin-2012
YPR102C	YDR447C	0.0140333	Co-expression	Aceituno-Agosin-2012
YPR102C	YHR010W	0.0119688	Co-expression	Aceituno-Agosin-2012
YPR102C	YNL302C	0.0154214	Co-expression	Aceituno-Agosin-2012
YPR102C	YOL121C	0.0127289	Co-expression	Aceituno-Agosin-2012
YPR102C	YOL127W	0.0108563	Co-expression	Aceituno-Agosin-2012
YPR102C	YOR293W	0.0140276	Co-expression	Aceituno-Agosin-2012
YPR102C	YOR369C	0.0161248	Co-expression	Aceituno-Agosin-2012
YPR102C	YPL143W	0.0101089	Co-expression	Aceituno-Agosin-2012
YPR145W	YAL012W	0.0147017	Co-expression	Aceituno-Agosin-2012
YPR145W	YBR011C	0.0105746	Co-expression	Aceituno-Agosin-2012
YPR145W	YDR037W	0.00950837	Co-expression	Aceituno-Agosin-2012
YPR145W	YER165W	0.0126688	Co-expression	Aceituno-Agosin-2012
YPR145W	YGL202W	0.013824	Co-expression	Aceituno-Agosin-2012
YPR145W	YLR058C	0.0116491	Co-expression	Aceituno-Agosin-2012
YPR145W	YOR332W	0.0107066	Co-expression	Aceituno-Agosin-2012
YPR160W	YFR053C	0.0119218	Co-expression	Aceituno-Agosin-2012
YPR163C	YKL152C	0.00935632	Co-expression	Aceituno-Agosin-2012
YPR163C	YLR150W	0.00801246	Co-expression	Aceituno-Agosin-2012
YPR163C	YNL209W	0.00943636	Co-expression	Aceituno-Agosin-2012
YPR163C	YOL040C	0.00825072	Co-expression	Aceituno-Agosin-2012
YPR191W	YBL045C	0.0152233	Co-expression	Aceituno-Agosin-2012
YPR191W	YBL099W	0.01346	Co-expression	Aceituno-Agosin-2012
YPR191W	YIL051C	0.0163428	Co-expression	Aceituno-Agosin-2012
YPR191W	YJR121W	0.0154475	Co-expression	Aceituno-Agosin-2012
RPL13A	YBL092W	0.00470933	Co-expression	Brauer-Botstein-2008
RPL13A	YBR189W	0.00377906	Co-expression	Brauer-Botstein-2008
RPL13A	YBR191W	0.00442942	Co-expression	Brauer-Botstein-2008
RPL13A	YDL075W	0.00280629	Co-expression	Brauer-Botstein-2008
RPL13A	YDL130W	0.0039153	Co-expression	Brauer-Botstein-2008
RPL13A	YDR064W	0.00583372	Co-expression	Brauer-Botstein-2008
RPL13A	YDR382W	0.00509533	Co-expression	Brauer-Botstein-2008
RPL13A	YDR471W	0.00387529	Co-expression	Brauer-Botstein-2008
RPL13A	YFL034C-A	0.00440994	Co-expression	Brauer-Botstein-2008
RPL13A	YGR034W	0.00431361	Co-expression	Brauer-Botstein-2008
RPL13A	YGR085C	0.00338144	Co-expression	Brauer-Botstein-2008
RPL13A	YGR148C	0.00447415	Co-expression	Brauer-Botstein-2008
RPL13A	YHL001W	0.00412375	Co-expression	Brauer-Botstein-2008
RPL13A	YHL015W	0.00464945	Co-expression	Brauer-Botstein-2008
RPL13A	YHR010W	0.0034848	Co-expression	Brauer-Botstein-2008
RPL13A	YIL051C	0.00578714	Co-expression	Brauer-Botstein-2008
RPL13A	YKL006W	0.0044246	Co-expression	Brauer-Botstein-2008
RPL13A	YKL180W	0.00568685	Co-expression	Brauer-Botstein-2008
RPL13A	YLR325C	0.00357428	Co-expression	Brauer-Botstein-2008
RPL13A	YLR333C	0.00441004	Co-expression	Brauer-Botstein-2008
RPL13A	YLR344W	0.00416859	Co-expression	Brauer-Botstein-2008
RPL13A	YLR367W	0.00362676	Co-expression	Brauer-Botstein-2008
RPL13A	YLR388W	0.00463092	Co-expression	Brauer-Botstein-2008
RPL13A	YLR406C	0.00364907	Co-expression	Brauer-Botstein-2008
RPL13A	YLR448W	0.00458527	Co-expression	Brauer-Botstein-2008
RPL13A	YML063W	0.00387155	Co-expression	Brauer-Botstein-2008
RPL13A	YML073C	0.00511838	Co-expression	Brauer-Botstein-2008
RPL13A	YMR230W	0.00354041	Co-expression	Brauer-Botstein-2008
RPL13A	YNL178W	0.00424267	Co-expression	Brauer-Botstein-2008
RPL13A	YNL302C	0.00394632	Co-expression	Brauer-Botstein-2008
RPL13A	YOL039W	0.00387546	Co-expression	Brauer-Botstein-2008
RPL13A	YOL040C	0.00437036	Co-expression	Brauer-Botstein-2008
RPL13A	YOL121C	0.00476865	Co-expression	Brauer-Botstein-2008
RPL13A	YOR096W	0.00349451	Co-expression	Brauer-Botstein-2008
RPL13A	YOR293W	0.00372187	Co-expression	Brauer-Botstein-2008
RPL13A	YPL037C	0.00430054	Co-expression	Brauer-Botstein-2008
RPL13A	YPL079W	0.00451743	Co-expression	Brauer-Botstein-2008
RPL13A	YPL081W	0.00441851	Co-expression	Brauer-Botstein-2008
RPL13A	YPR102C	0.00394323	Co-expression	Brauer-Botstein-2008
RPL13B	YBL092W	0.00694293	Co-expression	Brauer-Botstein-2008
RPL13B	YGL031C	0.00423878	Co-expression	Brauer-Botstein-2008
RPL13B	YGR027C	0.00771634	Co-expression	Brauer-Botstein-2008
RPL13B	YGR085C	0.00425031	Co-expression	Brauer-Botstein-2008
RPL13B	YHR010W	0.00481835	Co-expression	Brauer-Botstein-2008
RPL13B	YIL052C	0.00611604	Co-expression	Brauer-Botstein-2008
RPL13B	YLR325C	0.00499521	Co-expression	Brauer-Botstein-2008
RPL13B	YLR333C	0.00642228	Co-expression	Brauer-Botstein-2008
RPL13B	YNL067W	0.00924147	Co-expression	Brauer-Botstein-2008
RPL13B	YNL178W	0.00582564	Co-expression	Brauer-Botstein-2008
RPL13B	YNL302C	0.00520301	Co-expression	Brauer-Botstein-2008
RPL13B	YOL121C	0.00684821	Co-expression	Brauer-Botstein-2008
RPL13B	YOL127W	0.00632272	Co-expression	Brauer-Botstein-2008
RPL13B	YOR020C	0.00761528	Co-expression	Brauer-Botstein-2008
RPL13B	YOR096W	0.00484875	Co-expression	Brauer-Botstein-2008
RPL13B	YOR293W	0.00521734	Co-expression	Brauer-Botstein-2008
RPL13B	YPR102C	0.00530131	Co-expression	Brauer-Botstein-2008
RPL15A	RPS31	0.0115735	Co-expression	Brauer-Botstein-2008
RPL15A	YDR447C	0.00883213	Co-expression	Brauer-Botstein-2008
RPL15A	YGR027C	0.00886547	Co-expression	Brauer-Botstein-2008
RPL36A	RPL13A	0.00380397	Co-expression	Brauer-Botstein-2008
RPL36A	RPP1A	0.00422347	Co-expression	Brauer-Botstein-2008
RPL36A	RPS14A	0.00403046	Co-expression	Brauer-Botstein-2008
RPL36A	YBR189W	0.003615	Co-expression	Brauer-Botstein-2008
RPL36A	YBR191W	0.00428299	Co-expression	Brauer-Botstein-2008
RPL36A	YDL075W	0.00274618	Co-expression	Brauer-Botstein-2008
RPL36A	YDL130W	0.004048	Co-expression	Brauer-Botstein-2008
RPL36A	YDR064W	0.00552089	Co-expression	Brauer-Botstein-2008
RPL36A	YDR471W	0.003988	Co-expression	Brauer-Botstein-2008
RPL36A	YFL034C-A	0.00432977	Co-expression	Brauer-Botstein-2008
RPL36A	YGL076C	0.00313515	Co-expression	Brauer-Botstein-2008
RPL36A	YGR085C	0.00330114	Co-expression	Brauer-Botstein-2008
RPL36A	YGR148C	0.00427403	Co-expression	Brauer-Botstein-2008
RPL36A	YHL001W	0.00416018	Co-expression	Brauer-Botstein-2008
RPL36A	YHL015W	0.00474693	Co-expression	Brauer-Botstein-2008
RPL36A	YHL033C	0.00454214	Co-expression	Brauer-Botstein-2008
RPL36A	YHR010W	0.00338004	Co-expression	Brauer-Botstein-2008
RPL36A	YJL136C	0.00499541	Co-expression	Brauer-Botstein-2008
RPL36A	YJL190C	0.00527112	Co-expression	Brauer-Botstein-2008
RPL36A	YKL006W	0.00436943	Co-expression	Brauer-Botstein-2008
RPL36A	YKR057W	0.00504791	Co-expression	Brauer-Botstein-2008
RPL36A	YLR293C	0.00394749	Co-expression	Brauer-Botstein-2008
RPL36A	YLR325C	0.00342636	Co-expression	Brauer-Botstein-2008
RPL36A	YLR344W	0.00401195	Co-expression	Brauer-Botstein-2008
RPL36A	YLR367W	0.00365066	Co-expression	Brauer-Botstein-2008
RPL36A	YLR406C	0.00363211	Co-expression	Brauer-Botstein-2008
RPL36A	YLR448W	0.00460811	Co-expression	Brauer-Botstein-2008
RPL36A	YML063W	0.00391626	Co-expression	Brauer-Botstein-2008
RPL36A	YMR230W	0.00345202	Co-expression	Brauer-Botstein-2008
RPL36A	YNL178W	0.00403524	Co-expression	Brauer-Botstein-2008
RPL36A	YNL302C	0.00382525	Co-expression	Brauer-Botstein-2008
RPL36A	YOL039W	0.0038121	Co-expression	Brauer-Botstein-2008
RPL36A	YOL040C	0.00418077	Co-expression	Brauer-Botstein-2008
RPL36A	YOR096W	0.00346988	Co-expression	Brauer-Botstein-2008
RPL36A	YOR234C	0.00515189	Co-expression	Brauer-Botstein-2008
RPL36A	YOR293W	0.00373446	Co-expression	Brauer-Botstein-2008
RPL36A	YPL037C	0.00412269	Co-expression	Brauer-Botstein-2008
RPL36A	YPL079W	0.00420324	Co-expression	Brauer-Botstein-2008
RPL36A	YPL081W	0.00427057	Co-expression	Brauer-Botstein-2008
RPL36A	YPL143W	0.00537064	Co-expression	Brauer-Botstein-2008
RPL36A	YPR102C	0.00378564	Co-expression	Brauer-Botstein-2008
RPL37A	RPS26B	0.00792885	Co-expression	Brauer-Botstein-2008
RPL37A	RPS31	0.00908757	Co-expression	Brauer-Botstein-2008
RPL37A	YDR447C	0.00939587	Co-expression	Brauer-Botstein-2008
RPL37A	YLR061W	0.00724236	Co-expression	Brauer-Botstein-2008
RPL37A	YNL067W	0.011003	Co-expression	Brauer-Botstein-2008
RPL37A	YNL069C	0.0122374	Co-expression	Brauer-Botstein-2008
RPL37A	YOL127W	0.00603889	Co-expression	Brauer-Botstein-2008
RPL37B	RPL37A	0.0113001	Co-expression	Brauer-Botstein-2008
RPL37B	RPS31	0.00870543	Co-expression	Brauer-Botstein-2008
RPL37B	YDR447C	0.00876193	Co-expression	Brauer-Botstein-2008
RPL37B	YLR061W	0.00750684	Co-expression	Brauer-Botstein-2008
RPL37B	YNL067W	0.0104919	Co-expression	Brauer-Botstein-2008
RPL37B	YNL069C	0.0116125	Co-expression	Brauer-Botstein-2008
RPL37B	YOL127W	0.006119	Co-expression	Brauer-Botstein-2008
RPL39	RPL13B	0.00590888	Co-expression	Brauer-Botstein-2008
RPL39	RPL37A	0.00676121	Co-expression	Brauer-Botstein-2008
RPL39	RPL37B	0.00704055	Co-expression	Brauer-Botstein-2008
RPL39	YGR027C	0.00615189	Co-expression	Brauer-Botstein-2008
RPL39	YIL052C	0.00502965	Co-expression	Brauer-Botstein-2008
RPL39	YLR061W	0.00582162	Co-expression	Brauer-Botstein-2008
RPL39	YLR333C	0.00501889	Co-expression	Brauer-Botstein-2008
RPL39	YNL067W	0.00747725	Co-expression	Brauer-Botstein-2008
RPL39	YNL069C	0.00727309	Co-expression	Brauer-Botstein-2008
RPL39	YOL121C	0.00541695	Co-expression	Brauer-Botstein-2008
RPL39	YOL127W	0.00514133	Co-expression	Brauer-Botstein-2008
RPL39	YOR096W	0.00378485	Co-expression	Brauer-Botstein-2008
RPL39	YOR293W	0.00420796	Co-expression	Brauer-Botstein-2008
RPL5	RPS0A	0.00941919	Co-expression	Brauer-Botstein-2008
RPL5	RPS14A	0.00567666	Co-expression	Brauer-Botstein-2008
RPL5	YBR189W	0.00487917	Co-expression	Brauer-Botstein-2008
RPL5	YCR053W	0.00726013	Co-expression	Brauer-Botstein-2008
RPL5	YDL014W	0.00491908	Co-expression	Brauer-Botstein-2008
RPL5	YDL130W	0.00553323	Co-expression	Brauer-Botstein-2008
RPL5	YHL033C	0.00704899	Co-expression	Brauer-Botstein-2008
RPL5	YHR019C	0.00648883	Co-expression	Brauer-Botstein-2008
RPL5	YHR020W	0.00740875	Co-expression	Brauer-Botstein-2008
RPL5	YLL045C	0.00739604	Co-expression	Brauer-Botstein-2008
RPL5	YMR116C	0.0101802	Co-expression	Brauer-Botstein-2008
RPL5	YOL040C	0.00620093	Co-expression	Brauer-Botstein-2008
RPL5	YOR063W	0.00871644	Co-expression	Brauer-Botstein-2008
RPP0	RPL5	0.00865086	Co-expression	Brauer-Botstein-2008
RPP0	YBR221C	0.00889557	Co-expression	Brauer-Botstein-2008
RPP0	YDL229W	0.00795578	Co-expression	Brauer-Botstein-2008
RPP0	YHL033C	0.00672817	Co-expression	Brauer-Botstein-2008
RPP0	YHR019C	0.00669815	Co-expression	Brauer-Botstein-2008
RPP0	YHR020W	0.00729317	Co-expression	Brauer-Botstein-2008
RPP0	YKL164C	0.00967334	Co-expression	Brauer-Botstein-2008
RPP0	YLL045C	0.00749264	Co-expression	Brauer-Botstein-2008
RPP0	YMR116C	0.0110358	Co-expression	Brauer-Botstein-2008
RPP0	YNL209W	0.00863957	Co-expression	Brauer-Botstein-2008
RPP1A	YAR015W	0.00665586	Co-expression	Brauer-Botstein-2008
RPP1A	YBR189W	0.00388462	Co-expression	Brauer-Botstein-2008
RPP1A	YDL130W	0.00477163	Co-expression	Brauer-Botstein-2008
RPP1A	YDR471W	0.00443146	Co-expression	Brauer-Botstein-2008
RPP1A	YGR085C	0.00342807	Co-expression	Brauer-Botstein-2008
RPP1A	YGR148C	0.00471732	Co-expression	Brauer-Botstein-2008
RPP1A	YHL015W	0.00540682	Co-expression	Brauer-Botstein-2008
RPP1A	YHL033C	0.00564784	Co-expression	Brauer-Botstein-2008
RPP1A	YJL177W	0.00620417	Co-expression	Brauer-Botstein-2008
RPP1A	YLL050C	0.00572494	Co-expression	Brauer-Botstein-2008
RPP1A	YLR344W	0.00442296	Co-expression	Brauer-Botstein-2008
RPP1A	YLR367W	0.00418403	Co-expression	Brauer-Botstein-2008
RPP1A	YLR448W	0.00535087	Co-expression	Brauer-Botstein-2008
RPP1A	YML063W	0.00443677	Co-expression	Brauer-Botstein-2008
RPP1A	YOL039W	0.00410713	Co-expression	Brauer-Botstein-2008
RPP1A	YOL040C	0.00499232	Co-expression	Brauer-Botstein-2008
RPP1A	YPL143W	0.00640857	Co-expression	Brauer-Botstein-2008
RPS0A	YDL014W	0.00586581	Co-expression	Brauer-Botstein-2008
RPS0A	YDL130W	0.00622184	Co-expression	Brauer-Botstein-2008
RPS0A	YGL076C	0.00524312	Co-expression	Brauer-Botstein-2008
RPS0A	YHR068W	0.00522943	Co-expression	Brauer-Botstein-2008
RPS0A	YLL045C	0.00799912	Co-expression	Brauer-Botstein-2008
RPS0A	YLR293C	0.00649486	Co-expression	Brauer-Botstein-2008
RPS0A	YML056C	0.00691007	Co-expression	Brauer-Botstein-2008
RPS0A	YMR116C	0.011618	Co-expression	Brauer-Botstein-2008
RPS0A	YNL016W	0.00910559	Co-expression	Brauer-Botstein-2008
RPS0A	YPL198W	0.00866122	Co-expression	Brauer-Botstein-2008
RPS0A	YPR041W	0.00535391	Co-expression	Brauer-Botstein-2008
RPS0B	YFL022C	0.00614318	Co-expression	Brauer-Botstein-2008
RPS0B	YHR068W	0.00476017	Co-expression	Brauer-Botstein-2008
RPS0B	YNL096C	0.00749334	Co-expression	Brauer-Botstein-2008
RPS14A	RPL13A	0.00418991	Co-expression	Brauer-Botstein-2008
RPS14A	RPS0A	0.00641276	Co-expression	Brauer-Botstein-2008
RPS14A	YBR189W	0.00409088	Co-expression	Brauer-Botstein-2008
RPS14A	YBR191W	0.00465327	Co-expression	Brauer-Botstein-2008
RPS14A	YDL014W	0.00381691	Co-expression	Brauer-Botstein-2008
RPS14A	YDL075W	0.00298555	Co-expression	Brauer-Botstein-2008
RPS14A	YDL130W	0.00452082	Co-expression	Brauer-Botstein-2008
RPS14A	YDR064W	0.00644585	Co-expression	Brauer-Botstein-2008
RPS14A	YDR382W	0.00543834	Co-expression	Brauer-Botstein-2008
RPS14A	YDR471W	0.00412395	Co-expression	Brauer-Botstein-2008
RPS14A	YFL034C-A	0.00466939	Co-expression	Brauer-Botstein-2008
RPS14A	YGL068W	0.00564053	Co-expression	Brauer-Botstein-2008
RPS14A	YGL076C	0.00351636	Co-expression	Brauer-Botstein-2008
RPS14A	YGR034W	0.00452258	Co-expression	Brauer-Botstein-2008
RPS14A	YGR085C	0.0035544	Co-expression	Brauer-Botstein-2008
RPS14A	YGR148C	0.00479415	Co-expression	Brauer-Botstein-2008
RPS14A	YHL001W	0.00469508	Co-expression	Brauer-Botstein-2008
RPS14A	YHL033C	0.00498142	Co-expression	Brauer-Botstein-2008
RPS14A	YIL051C	0.00634121	Co-expression	Brauer-Botstein-2008
RPS14A	YKL006W	0.00501423	Co-expression	Brauer-Botstein-2008
RPS14A	YLR293C	0.00437969	Co-expression	Brauer-Botstein-2008
RPS14A	YLR325C	0.0037015	Co-expression	Brauer-Botstein-2008
RPS14A	YLR344W	0.00440975	Co-expression	Brauer-Botstein-2008
RPS14A	YLR367W	0.00386996	Co-expression	Brauer-Botstein-2008
RPS14A	YLR406C	0.0039805	Co-expression	Brauer-Botstein-2008
RPS14A	YML056C	0.00447539	Co-expression	Brauer-Botstein-2008
RPS14A	YMR116C	0.00757028	Co-expression	Brauer-Botstein-2008
RPS14A	YMR230W	0.00369425	Co-expression	Brauer-Botstein-2008
RPS14A	YNL302C	0.00404474	Co-expression	Brauer-Botstein-2008
RPS14A	YOL039W	0.00434642	Co-expression	Brauer-Botstein-2008
RPS14A	YPL037C	0.00443005	Co-expression	Brauer-Botstein-2008
RPS14A	YPL079W	0.00464278	Co-expression	Brauer-Botstein-2008
RPS14A	YPL081W	0.00466836	Co-expression	Brauer-Botstein-2008
RPS14A	YPL198W	0.00571259	Co-expression	Brauer-Botstein-2008
RPS14A	YPR102C	0.00417642	Co-expression	Brauer-Botstein-2008
RPS26A	RPL13B	0.00701014	Co-expression	Brauer-Botstein-2008
RPS26A	RPL15A	0.00850655	Co-expression	Brauer-Botstein-2008
RPS26A	RPL37A	0.00861255	Co-expression	Brauer-Botstein-2008
RPS26A	RPL37B	0.00868621	Co-expression	Brauer-Botstein-2008
RPS26A	RPL39	0.00656806	Co-expression	Brauer-Botstein-2008
RPS26A	RPS31	0.00860671	Co-expression	Brauer-Botstein-2008
RPS26A	YGR027C	0.00888864	Co-expression	Brauer-Botstein-2008
RPS26A	YIL052C	0.00579313	Co-expression	Brauer-Botstein-2008
RPS26A	YLR333C	0.00629478	Co-expression	Brauer-Botstein-2008
RPS26A	YNL069C	0.00908153	Co-expression	Brauer-Botstein-2008
RPS26A	YOL121C	0.00671621	Co-expression	Brauer-Botstein-2008
RPS26A	YOL127W	0.00605353	Co-expression	Brauer-Botstein-2008
RPS26A	YOR020C	0.00780576	Co-expression	Brauer-Botstein-2008
RPS26B	RPS28A	0.00473592	Co-expression	Brauer-Botstein-2008
RPS26B	YDL075W	0.0041794	Co-expression	Brauer-Botstein-2008
RPS26B	YER056C-A	0.00916942	Co-expression	Brauer-Botstein-2008
RPS26B	YGL147C	0.00876943	Co-expression	Brauer-Botstein-2008
RPS26B	YLR061W	0.00814191	Co-expression	Brauer-Botstein-2008
RPS26B	YNL067W	0.0112458	Co-expression	Brauer-Botstein-2008
RPS26B	YNL096C	0.0077135	Co-expression	Brauer-Botstein-2008
RPS27B	YER012W	0.00575647	Co-expression	Brauer-Botstein-2008
RPS27B	YGR034W	0.00460125	Co-expression	Brauer-Botstein-2008
RPS27B	YGR148C	0.00478158	Co-expression	Brauer-Botstein-2008
RPS27B	YJL177W	0.0066245	Co-expression	Brauer-Botstein-2008
RPS27B	YKL180W	0.00665122	Co-expression	Brauer-Botstein-2008
RPS27B	YLL050C	0.00578947	Co-expression	Brauer-Botstein-2008
RPS27B	YLR344W	0.00445092	Co-expression	Brauer-Botstein-2008
RPS27B	YLR367W	0.00383474	Co-expression	Brauer-Botstein-2008
RPS27B	YLR388W	0.00594345	Co-expression	Brauer-Botstein-2008
RPS27B	YLR448W	0.00511268	Co-expression	Brauer-Botstein-2008
RPS27B	YML024W	0.00499885	Co-expression	Brauer-Botstein-2008
RPS27B	YML063W	0.00442377	Co-expression	Brauer-Botstein-2008
RPS27B	YML073C	0.00597205	Co-expression	Brauer-Botstein-2008
RPS27B	YMR230W	0.0037008	Co-expression	Brauer-Botstein-2008
RPS27B	YNL302C	0.00412844	Co-expression	Brauer-Botstein-2008
RPS27B	YOL040C	0.00471617	Co-expression	Brauer-Botstein-2008
RPS27B	YOR369C	0.00507487	Co-expression	Brauer-Botstein-2008
RPS27B	YPL079W	0.00473386	Co-expression	Brauer-Botstein-2008
RPS28A	YDL075W	0.00242362	Co-expression	Brauer-Botstein-2008
RPS28A	YDR382W	0.00417475	Co-expression	Brauer-Botstein-2008
[truncated: 79,851 more rows]
[truncated: 227 more columns]

## Sheet: GO
GO id	Description	q-value	Occurrences in Sample	Occurrences in Genome
GO:0002181	cytoplasmic translation	1.31775e-141	121	162
GO:0022626	cytosolic ribosome	1.53298e-138	121	168
GO:0044445	cytosolic part	6.96562e-124	127	230
GO:0003735	structural constituent of ribosome	3.54559e-115	119	215
GO:0044391	ribosomal subunit	9.37763e-111	119	229
GO:0022625	cytosolic large ribosomal subunit	8.36471e-73	66	89
GO:0022627	cytosolic small ribosomal subunit	6.4933e-64	53	62
GO:0015934	large ribosomal subunit	1.99718e-55	66	134
GO:0015935	small ribosomal subunit	1.47296e-47	53	95
GO:0051029	rRNA transport	2.51411e-18	16	18
GO:0006407	rRNA export from nucleus	2.51411e-18	16	18
GO:0006414	translational elongation	4.82176e-16	22	48
GO:0042274	ribosomal small subunit biogenesis	4.98048e-15	32	126
GO:0042255	ribosome assembly	3.94881e-13	21	56
GO:0006364	rRNA processing	1.62888e-12	39	227
GO:0030684	preribosome	1.66366e-12	34	173
GO:0000462	maturation of SSU-rRNA from tricistronic rRNA transcript (SSU-rRNA, 5.8S rRNA, LSU-rRNA)	7.1492e-12	25	95
GO:0030490	maturation of SSU-rRNA	7.55117e-12	26	104
GO:0016072	rRNA metabolic process	1.7586e-11	39	245
GO:0030686	90S preribosome	7.88268e-08	20	90
GO:0070925	organelle assembly	2.39047e-07	22	116
GO:0042645	mitochondrial nucleoid	4.61323e-07	11	26
GO:0009295	nucleoid	4.61323e-07	11	26
GO:0006450	regulation of translational fidelity	5.5744e-07	9	16
GO:0000028	ribosomal small subunit assembly	5.5744e-07	9	16
GO:0006520	cellular amino acid metabolic process	1.49471e-06	31	241
GO:0006405	RNA export from nucleus	2.85817e-06	18	90
GO:0071826	ribonucleoprotein complex subunit organization	3.14558e-06	23	146
GO:0042273	ribosomal large subunit biogenesis	4.29022e-06	18	93
GO:0051236	establishment of RNA localization	4.29022e-06	18	93
GO:0050658	RNA transport	4.29022e-06	18	93
GO:0051168	nuclear export	5.69655e-06	21	128
GO:0050657	nucleic acid transport	5.69655e-06	18	95
GO:0022618	ribonucleoprotein complex assembly	5.69655e-06	22	140
GO:0000027	ribosomal large subunit assembly	8.42049e-06	11	34
GO:0006091	generation of precursor metabolites and energy	1.39325e-05	23	160
GO:0006403	RNA localization	1.39325e-05	19	112
GO:0043648	dicarboxylic acid metabolic process	2.34933e-05	10	30
GO:0006448	regulation of translational elongation	3.07311e-05	9	24
GO:0033178	proton-transporting two-sector ATPase complex, catalytic domain	3.55355e-05	7	13
GO:0006457	protein folding	5.91746e-05	16	89
GO:0006164	purine nucleotide biosynthetic process	0.00010213	11	43
GO:0006417	regulation of translation	0.000102901	16	93
GO:0010608	posttranscriptional regulation of gene expression	0.000102901	18	116
GO:0072522	purine-containing compound biosynthetic process	0.000122883	12	53
GO:0006913	nucleocytoplasmic transport	0.000171354	22	172
GO:0006099	tricarboxylic acid cycle	0.000177727	7	16
GO:0051169	nuclear transport	0.000177727	22	173
GO:0015931	nucleobase-containing compound transport	0.000177727	18	121
GO:0006458	'de novo' protein folding	0.000202011	6	11
GO:0009127	purine nucleoside monophosphate biosynthetic process	0.000203838	9	30
GO:0009168	purine ribonucleoside monophosphate biosynthetic process	0.000203838	9	30
GO:1901605	alpha-amino acid metabolic process	0.000213804	19	136
GO:1901607	alpha-amino acid biosynthetic process	0.000339616	16	103
GO:0009126	purine nucleoside monophosphate metabolic process	0.000339616	9	32
GO:0009167	purine ribonucleoside monophosphate metabolic process	0.000339616	9	32
GO:0009156	ribonucleoside monophosphate biosynthetic process	0.000339616	9	32
GO:0009152	purine ribonucleotide biosynthetic process	0.000491195	10	42
GO:0009124	nucleoside monophosphate biosynthetic process	0.000562062	9	34
GO:0009161	ribonucleoside monophosphate metabolic process	0.000562062	9	34
GO:0009123	nucleoside monophosphate metabolic process	0.000909547	9	36
GO:0006418	tRNA aminoacylation for protein translation	0.000909547	9	36
GO:0009260	ribonucleotide biosynthetic process	0.00108636	10	46
GO:0030687	preribosome, large subunit precursor	0.00115049	13	78
GO:0006096	glycolysis	0.00158974	7	22
GO:0044769	ATPase activity, coupled to transmembrane movement of ions, rotational mechanism	0.00163611	8	30
GO:0008652	cellular amino acid biosynthetic process	0.00164221	17	131
GO:0043038	amino acid activation	0.00165442	9	39
GO:0043039	tRNA aminoacylation	0.00165442	9	39
GO:1990204	oxidoreductase complex	0.00200755	8	31
GO:0046365	monosaccharide catabolic process	0.00210676	10	50
GO:0009142	nucleoside triphosphate biosynthetic process	0.00271755	7	24
GO:0046390	ribose phosphate biosynthetic process	0.00293897	10	52
GO:0042026	protein refolding	0.00297896	6	17
GO:0016469	proton-transporting two-sector ATPase complex	0.00307455	8	33
GO:0072521	purine-containing compound metabolic process	0.00309012	14	99
GO:0051082	unfolded protein binding	0.00456621	11	66
GO:0006537	glutamate biosynthetic process	0.00525238	5	12
GO:0005759	mitochondrial matrix	0.00525238	19	174
GO:0009206	purine ribonucleoside triphosphate biosynthetic process	0.0052619	6	19
GO:0055086	nucleobase-containing small molecule metabolic process	0.0052619	20	190
GO:0016875	ligase activity, forming carbon-oxygen bonds	0.0052619	8	36
GO:0009145	purine nucleoside triphosphate biosynthetic process	0.0052619	6	19
GO:0015992	proton transport	0.0052619	7	27
GO:0004812	aminoacyl-tRNA ligase activity	0.0052619	8	36
GO:0016876	ligase activity, forming aminoacyl-tRNA and related compounds	0.0052619	8	36
GO:0019320	hexose catabolic process	0.00532719	9	46
GO:0009165	nucleotide biosynthetic process	0.00537953	12	80
GO:1901293	nucleoside phosphate biosynthetic process	0.00602428	12	81
GO:0006818	hydrogen transport	0.00647624	7	28
GO:0044283	small molecule biosynthetic process	0.00675665	25	274
GO:0043650	dicarboxylic acid biosynthetic process	0.00677563	6	20
GO:0032040	small-subunit processome	0.00706949	9	48
GO:0019829	cation-transporting ATPase activity	0.00725367	8	38
GO:0016053	organic acid biosynthetic process	0.00736826	18	166
GO:0046394	carboxylic acid biosynthetic process	0.00736826	18	166
GO:0015980	energy derivation by oxidation of organic compounds	0.00736826	16	137
GO:0015078	hydrogen ion transmembrane transporter activity	0.00785227	10	60
GO:0006007	glucose catabolic process	0.00836713	8	39
GO:0009201	ribonucleoside triphosphate biosynthetic process	0.00843525	6	21
GO:0032268	regulation of cellular protein metabolic process	0.00875052	19	184
GO:0006163	purine nucleotide metabolic process	0.0114018	11	75
GO:0006536	glutamate metabolic process	0.0137238	5	15
GO:0044724	single-organism carbohydrate catabolic process	0.0142047	11	77
GO:0009150	purine ribonucleotide metabolic process	0.0145739	10	65
GO:0051246	regulation of protein metabolic process	0.0145932	19	192
GO:0042625	ATPase activity, coupled to transmembrane movement of ions	0.0158684	8	43
GO:0005844	polysome	0.0163854	7	33
GO:0046961	proton-transporting ATPase activity, rotational mechanism	0.0182477	5	16
GO:0009117	nucleotide metabolic process	0.0187961	16	150
GO:0009060	aerobic respiration	0.0201338	10	68
GO:0016052	carbohydrate catabolic process	0.020756	11	81
GO:0009259	ribonucleotide metabolic process	0.0223251	10	69
GO:1902600	hydrogen ion transmembrane transport	0.0229066	5	17
GO:0006754	ATP biosynthetic process	0.0229066	5	17
GO:0016866	intramolecular transferase activity	0.0229066	5	17
GO:0015985	energy coupled proton transport, down electrochemical gradient	0.0229066	5	17
GO:0015986	ATP synthesis coupled proton transport	0.0229066	5	17
GO:0046933	proton-transporting ATP synthase activity, rotational mechanism	0.0229066	5	17
GO:0006753	nucleoside phosphate metabolic process	0.0249857	16	155
GO:0045259	proton-transporting ATP synthase complex	0.0294467	5	18
GO:0036442	hydrogen-exporting ATPase activity	0.0294467	5	18
GO:0046034	ATP metabolic process	0.0294467	5	18
GO:0005753	mitochondrial proton-transporting ATP synthase complex	0.0294467	5	18
GO:0055114	oxidation-reduction process	0.030492	17	174
GO:0019200	carbohydrate kinase activity	0.0346627	4	11
GO:0015077	monovalent inorganic cation transmembrane transporter activity	0.0391662	10	75
GO:0016491	oxidoreductase activity	0.0396263	23	279
GO:0019693	ribose phosphate metabolic process	0.04286	10	76
GO:0009084	glutamine family amino acid biosynthetic process	0.0433097	6	29
GO:0006090	pyruvate metabolic process	0.0484375	4	12
GO:0043624	cellular protein complex disassembly	0.0612007	7	42
GO:0009064	glutamine family amino acid metabolic process	0.0612007	7	42
GO:0015672	monovalent inorganic cation transport	0.0612007	7	42
GO:0031125	rRNA 3'-end processing	0.0728423	5	22
GO:0016874	ligase activity	0.0842692	17	192
GO:0006637	acyl-CoA metabolic process	0.0872399	4	14
GO:0035383	thioester metabolic process	0.0872399	4	14
GO:0046129	purine ribonucleoside biosynthetic process	0.0955009	6	34
GO:0042451	purine nucleoside biosynthetic process	0.0955009	6	34
GO:0071705	nitrogen compound transport	0.0955009	18	212
GO:0016853	isomerase activity	0.0955009	8	58
GO:0000478	endonucleolytic cleavage involved in rRNA processing	0.0985216	7	46
GO:0000479	endonucleolytic cleavage of tricistronic rRNA transcript (SSU-rRNA, 5.8S rRNA, LSU-rRNA)	0.0985216	7	46

## Sheet: Graph
q-value	Description	-log q-value
0.0985216	endonucleolytic cleavage involved in rRNA processing	1.00647
0.0985216	endonucleolytic cleavage of tricistronic rRNA transcript (SSU-rRNA, 5.8S rRNA, LSU-rRNA)	1.00647
0.0955009	purine ribonucleoside biosynthetic process	1.01999
0.0955009	purine nucleoside biosynthetic process	1.01999
0.0955009	nitrogen compound transport	1.01999
0.0955009	isomerase activity	1.01999
0.0872399	acyl-CoA metabolic process	1.05928
0.0872399	thioester metabolic process	1.05928
0.0842692	ligase activity	1.07433
0.0728423	rRNA 3'-end processing	1.13762
0.0612007	cellular protein complex disassembly	1.21324
0.0612007	glutamine family amino acid metabolic process	1.21324
0.0612007	monovalent inorganic cation transport	1.21324
0.0484375	pyruvate metabolic process	1.31482
0.0433097	glutamine family amino acid biosynthetic process	1.36341
0.04286	ribose phosphate metabolic process	1.36795
0.0396263	oxidoreductase activity	1.40202
0.0391662	monovalent inorganic cation transmembrane transporter activity	1.40709
0.0346627	carbohydrate kinase activity	1.46014
0.030492	oxidation-reduction process	1.51581
0.0294467	proton-transporting ATP synthase complex	1.53096
0.0294467	hydrogen-exporting ATPase activity	1.53096
0.0294467	ATP metabolic process	1.53096
0.0294467	mitochondrial proton-transporting ATP synthase complex	1.53096
0.0249857	nucleoside phosphate metabolic process	1.60231
0.0229066	hydrogen ion transmembrane transport	1.64004
0.0229066	ATP biosynthetic process	1.64004
0.0229066	intramolecular transferase activity	1.64004
0.0229066	energy coupled proton transport, down electrochemical gradient	1.64004
0.0229066	ATP synthesis coupled proton transport	1.64004
0.0229066	proton-transporting ATP synthase activity, rotational mechanism	1.64004
0.0223251	ribonucleotide metabolic process	1.65121
0.020756	carbohydrate catabolic process	1.68286
0.0201338	aerobic respiration	1.69607
0.0187961	nucleotide metabolic process	1.72593
0.0182477	proton-transporting ATPase activity, rotational mechanism	1.73879
0.0163854	polysome	1.78554
0.0158684	ATPase activity, coupled to transmembrane movement of ions	1.79947
0.0145932	regulation of protein metabolic process	1.83585
0.0145739	purine ribonucleotide metabolic process	1.83643
0.0142047	single-organism carbohydrate catabolic process	1.84757
0.0137238	glutamate metabolic process	1.86252
0.0114018	purine nucleotide metabolic process	1.94303
0.00875052	regulation of cellular protein metabolic process	2.05797
0.00843525	ribonucleoside triphosphate biosynthetic process	2.0739
0.00836713	glucose catabolic process	2.07742
0.00785227	hydrogen ion transmembrane transporter activity	2.105
0.00736826	organic acid biosynthetic process	2.13264
0.00736826	carboxylic acid biosynthetic process	2.13264
0.00736826	energy derivation by oxidation of organic compounds	2.13264
0.00725367	cation-transporting ATPase activity	2.13944
0.00706949	small-subunit processome	2.15061
0.00677563	dicarboxylic acid biosynthetic process	2.16905
0.00675665	small molecule biosynthetic process	2.17027
0.00647624	hydrogen transport	2.18868
0.00602428	nucleoside phosphate biosynthetic process	2.22009
0.00537953	nucleotide biosynthetic process	2.26926
0.00532719	hexose catabolic process	2.2735
0.0052619	purine ribonucleoside triphosphate biosynthetic process	2.27886
0.0052619	nucleobase-containing small molecule metabolic process	2.27886
0.0052619	ligase activity, forming carbon-oxygen bonds	2.27886
0.0052619	purine nucleoside triphosphate biosynthetic process	2.27886
0.0052619	proton transport	2.27886
0.0052619	aminoacyl-tRNA ligase activity	2.27886
0.0052619	ligase activity, forming aminoacyl-tRNA and related compounds	2.27886
0.00525238	glutamate biosynthetic process	2.27964
0.00525238	mitochondrial matrix	2.27964
0.00456621	unfolded protein binding	2.34044
0.00309012	purine-containing compound metabolic process	2.51003
0.00307455	proton-transporting two-sector ATPase complex	2.51222
0.00297896	protein refolding	2.52594
0.00293897	ribose phosphate biosynthetic process	2.53181
0.00271755	nucleoside triphosphate biosynthetic process	2.56582
0.00210676	monosaccharide catabolic process	2.67639
0.00200755	oxidoreductase complex	2.69733
0.00165442	amino acid activation	2.78135
0.00165442	tRNA aminoacylation	2.78135
0.00164221	cellular amino acid biosynthetic process	2.78457
0.00163611	ATPase activity, coupled to transmembrane movement of ions, rotational mechanism	2.78619
0.00158974	glycolysis	2.79867
0.00115049	preribosome, large subunit precursor	2.93912
0.00108636	ribonucleotide biosynthetic process	2.96403
0.000909547	nucleoside monophosphate metabolic process	3.04117
0.000909547	tRNA aminoacylation for protein translation	3.04117
0.000562062	nucleoside monophosphate biosynthetic process	3.25022
0.000562062	ribonucleoside monophosphate metabolic process	3.25022
0.000491195	purine ribonucleotide biosynthetic process	3.30875
0.000339616	alpha-amino acid biosynthetic process	3.46901
0.000339616	purine nucleoside monophosphate metabolic process	3.46901
0.000339616	purine ribonucleoside monophosphate metabolic process	3.46901
0.000339616	ribonucleoside monophosphate biosynthetic process	3.46901
0.000213804	alpha-amino acid metabolic process	3.66998
0.000203838	purine nucleoside monophosphate biosynthetic process	3.69071
0.000203838	purine ribonucleoside monophosphate biosynthetic process	3.69071
0.000202011	'de novo' protein folding	3.69462
0.000177727	tricarboxylic acid cycle	3.75025
0.000177727	nuclear transport	3.75025
0.000177727	nucleobase-containing compound transport	3.75025
0.000171354	nucleocytoplasmic transport	3.76611
0.000122883	purine-containing compound biosynthetic process	3.91051
0.000102901	regulation of translation	3.98758
0.000102901	posttranscriptional regulation of gene expression	3.98758
0.00010213	purine nucleotide biosynthetic process	3.99085
5.91746e-05	protein folding	4.22786
3.55355e-05	proton-transporting two-sector ATPase complex, catalytic domain	4.44934
3.07311e-05	regulation of translational elongation	4.51242
2.34933e-05	dicarboxylic acid metabolic process	4.62906
1.39325e-05	generation of precursor metabolites and energy	4.85597
1.39325e-05	RNA localization	4.85597
8.42049e-06	ribosomal large subunit assembly	5.07466
5.69655e-06	nuclear export	5.24439
5.69655e-06	nucleic acid transport	5.24439
5.69655e-06	ribonucleoprotein complex assembly	5.24439
4.29022e-06	ribosomal large subunit biogenesis	5.36752
4.29022e-06	establishment of RNA localization	5.36752
4.29022e-06	RNA transport	5.36752
3.14558e-06	ribonucleoprotein complex subunit organization	5.5023
2.85817e-06	RNA export from nucleus	5.54391
1.49471e-06	cellular amino acid metabolic process	5.82544
5.5744e-07	regulation of translational fidelity	6.2538
5.5744e-07	ribosomal small subunit assembly	6.2538
4.61323e-07	mitochondrial nucleoid	6.33599
4.61323e-07	nucleoid	6.33599
2.39047e-07	organelle assembly	6.62152
7.88268e-08	90S preribosome	7.10333
1.7586e-11	rRNA metabolic process	10.7548
7.55117e-12	maturation of SSU-rRNA	11.122
7.1492e-12	maturation of SSU-rRNA from tricistronic rRNA transcript (SSU-rRNA, 5.8S rRNA, LSU-rRNA)	11.1457
1.66366e-12	preribosome	11.7789
1.62888e-12	rRNA processing	11.7881
3.94881e-13	ribosome assembly	12.4035
4.98048e-15	ribosomal small subunit biogenesis	14.3027
4.82176e-16	translational elongation	15.3168
2.51411e-18	rRNA transport	17.5996
2.51411e-18	rRNA export from nucleus	17.5996
1.47296e-47	small ribosomal subunit	46.8318
1.99718e-55	large ribosomal subunit	54.6996
6.4933e-64	cytosolic small ribosomal subunit	63.1875
8.36471e-73	cytosolic large ribosomal subunit	72.0775
9.37763e-111	ribosomal subunit	110.028
3.54559e-115	structural constituent of ribosome	114.45
6.96562e-124	cytosolic part	123.157
1.53298e-138	cytosolic ribosome	137.814
1.31775e-141	cytoplasmic translation	140.88
